# Supplementary material
Source: PubMed Central journal article supplement (PMC7315949)
Supplement: mmc1.pdf [file mmc1.pdf]

**Table 1S Summary of the data. COVID-19 confirmed cases, deaths, and tests, and burden of non-communicable diseases, lockdown delay, number of tourists, life expectancy, and healthy life expectancy according to the A) Global Burden of Disease Study classification of countries and B) World Bank income level classification.**

| Super regions                                           | COVID-19                     |                            |                             |                                                      | Non-communicable diseases       |                              | Cardiovascular diseases       |                            | Life expectancy        | Healthy life expectancy | Lockdown*          | International tourism    |
|---------------------------------------------------------|------------------------------|----------------------------|-----------------------------|------------------------------------------------------|---------------------------------|------------------------------|-------------------------------|----------------------------|------------------------|-------------------------|--------------------|--------------------------|
|                                                         | Tests per million (95% CI)   | Cases per million (95% CI) | Deaths per million (95% CI) | Percentage of confirmed cases to tests performed (%) | DALYs per 100000 (95% UI)       | Deaths per 100000 (95% UI)   | DALYs per 100000 (95% UI)     | Deaths per 100000 (95% UI) | Years (95% UI)         | Years (95% UI)          | Days (IQR)         | Million arrivals in 2018 |
| <b>A. Global Burden of Disease Study classification</b> |                              |                            |                             |                                                      |                                 |                              |                               |                            |                        |                         |                    |                          |
| Central Europe, Eastern Europe, and Central Asia region | 41927.31 (41905.17–41949.45) | 1343.95 (1340.40–1347.49)  | 23.15 (22.68–23.61)         | 1.56                                                 | 29870.30 (27200.42 to 32884.00) | 1013.35 (1003.91 to 1022.59) | 11067.6 (10800.75 to 1339.18) | 612.83 (605.82 to 620.59)  | 73.06 (72.9 to 73.2)   | 63.06 (60.24 to 65.55)  | 9 (2 to 13)        | 245.89                   |
| High-income region                                      | 34757.76 (34746.66–34768.86) | 3050.60 (3047.30–3053.88)  | 249.72 (248.78–250.66)      | 6.55                                                 | 23778.16 (20877.82 to 27083.21) | 799.07 (789.08 to 808.45)    | 4231.29 (4034.62 to 4435.93)  | 277.96 (273.37 to 283.23)  | 81.02 (80.88 to 81.16) | 69.59 (66.35 to 72.36)  | 19 (13 to 44)      | 364.16                   |
| Latin America and Caribbean region                      | 2216.54 (2212.37–2220.72)    | 1276.58 (1273.67–1279.48)  | 75.42 (74.71–76.12)         | 18.98                                                | 18282.75 (16095.66 to 20785.06) | 441.20 (435.76 to 446.57)    | 3300.12 (3192.61 to 3416.93)  | 157.32 (154.88 to 159.78)  | 75.86 (75.56 to 76.15) | 66.21 (63.44 to 68.57)  | 1 (0 to 10)        | 129.69                   |
| North Africa and Middle East region                     | 16152.44 (16136.89–16168.04) | 1014.67 (1011.98–1017.36)  | 27.60 (27.16–28.04)         | 7.20                                                 | 18345.83 (15982.13 to 20996.15) | 353.61 (343.56 to 364.54)    | 4377.16 (4193.87 to 4578.48)  | 187.11 (181.23 to 193.44)  | 75.86 (75.56 to 76.15) | 66.21 (63.44 to 68.57)  | 9 (4 to 13)        | 100.17                   |
| South Asia region                                       | 2199.04 (2196.87–2201.21)    | 147.85 (147.29–148.40)     | 3.57 (3.49–3.66)            | 1.67                                                 | 19263.67 (17262.69 to 21591.08) | 444.10 (423.55 to 458.55)    | 4681.63 (4492.75 to 4847.12)  | 189.89 (180.87 to 196.67)  | 72.54 (72.09 to 72.96) | 59.48 (56.9 to 61.8)    | 17 (12 to 54)      | 897.41                   |
| Southeast Asia, East Asia, and Oceania region           | 2643.1 (2639.18–2647.01)     | 63.86 (63.52–64.20)        | 3.34 (3.26–3.42)            | 1.74                                                 | 21301.25 (19072.91 to 23900.89) | 606.41 (592.67 to 621.96)    | 5677.22 (5466.53 to 5892.72)  | 275.91 (269.21 to 283.01)  | 75.61 (75.33 to 75.88) | 66.64 (64.11 to 68.81)  | 34 (2 to 52)       | 499.70                   |
| Sub-Saharan Africa                                      | 2190.69 (2186.80–2194.59)    | 80.60 (80.08–81.12)        | 1.9 (1.82–1.98)             | 1.47                                                 | 14746.32 (12998.59 to 16739.18) | 250.40 (236.48 to 268.17)    | 2228.06 (2096.14 to 2368.79)  | 85.19 (80.47 to 90.93)     | 63.91 (63.06 to 64.65) | 55.2 (52.68 to 57.58)   | 2 (-5 to 5)        | 297.25                   |
| <b>B. World Bank classification</b>                     |                              |                            |                             |                                                      |                                 |                              |                               |                            |                        |                         |                    |                          |
| High-income countries                                   | 34908.03 (34897.34–34918.73) | 2962.47 (2959.39–2965.56)  | 228.79 (227.93–229.65)      | 6.24                                                 | 23691.99 (20786.54 to 26962.76) | 784.51 (775.53 to 792.79)    | 4362.40 (4160.84 to 4572.38)  | 280.60 (276.48 to 285.56)  | 80.82 (80.7 to 80.94)  | 69.4 (66.15 to 72.18)   | 14.5 (7.5 to 31.5) | 798.71                   |
| Upper middle-income countries                           | 15810.48 (15802.91–15818.06) | 614.39 (613.45–615.33)     | 25.51 (25.32–25.70)         | 3.65                                                 | 21298.92 (18991.72 to 23967.28) | 609.96 (599.38 to 620.65)    | 5593.41 (5406.94 to 5794.14)  | 286.57 (281.26 to 291.92)  | 76.07 (75.86 to 76.28) | 66.63 (64 to 68.9)      | 5 (1 to 12)        | 382.01                   |
| Lower middle-income countries                           | 2043.03 (2041.33–2044.74)    | 135.17 (134.77–135.58)     | 3.90 (3.83–3.97)            | 2.30                                                 | 19084.26 (17071.08 to 21435.58) | 434.61 (420.93 to 445.92)    | 4685.64 (4533.35 to 4825.17)  | 195.61 (189.77 to 200.96)  | 68.89 (68.5 to 69.28)  | 59.55 (56.95 to 61.87)  | 3 (1 to 13)        | 149.16                   |
| Low-income countries                                    | 1487.74 (1482.80–1492.68)    | 53.17 (52.63–53.71)        | 1.23 (1.15–1.31)            | 1.70                                                 | 15910.57 (14190.80 to 17798.17) | 287.97 (275.44 to 299.99)    | 2803.09 (2658.78 to 2936.56)  | 107.00 (101.97 to 112.26)  | 64.32 (63.66 to 64.93) | 55.66 (53.17 to 57.97)  | 1 (0 to 8)         | 12.16                    |

\*Days from COVID-19 first case to institutional shot down as median (25th to 75th); CI, confidence interval; COVID-19, coronavirus disease 2019; DALY, disability-adjusted life years; IQR, interquartile range; UI, uncertainty interval.

**Table 2S Regional and national rates of COVID-19 cases, deaths, and tests as of May 28, 2020**

| GBD regions and countries                               | Total cases per million | Total deaths per million | Total tests per thousand | Percentage of confirmed cases to tests performed |
|---------------------------------------------------------|-------------------------|--------------------------|--------------------------|--------------------------------------------------|
| <b>Central Europe, Eastern Europe, and Central Asia</b> |                         |                          |                          |                                                  |
| Albania                                                 | 364.9                   | 11.5                     |                          |                                                  |
| Armenia                                                 | 2623.5                  | 33.1                     |                          |                                                  |
| Azerbaijan                                              | 450.5                   | 5.3                      |                          |                                                  |
| Belarus                                                 | 4122.6                  | 22.6                     | 50.0                     | 8.2%                                             |
| Bosnia and Herzegovina                                  | 742.2                   | 46.0                     |                          |                                                  |
| Bulgaria                                                | 354.0                   | 19.1                     | 11.0                     | 3.2%                                             |
| Croatia                                                 | 546.6                   | 24.6                     | 15.5                     | 3.5%                                             |
| Czech Republic                                          | 848.4                   | 29.6                     | 39.0                     | 2.2%                                             |
| Estonia                                                 | 1387.1                  | 49.8                     | 60.0                     | 2.3%                                             |
| Georgia                                                 | 184.2                   | 3.0                      |                          |                                                  |
| Hungary                                                 | 395.0                   | 52.7                     | 17.6                     | 2.2%                                             |
| Kazakhstan                                              | 510.0                   | 2.0                      | 37.8                     | 1.3%                                             |
| Kyrgyzstan                                              | 244.3                   | 2.5                      |                          |                                                  |
| Latvia                                                  | 560.4                   | 12.2                     | 54.9                     | 1.0%                                             |
| Lithuania                                               | 605.0                   | 24.2                     | 103.3                    | 0.6%                                             |
| Macedonia                                               | 979.2                   | 57.1                     |                          |                                                  |
| Moldova                                                 | 1868.4                  | 67.9                     |                          |                                                  |
| Mongolia                                                | 49.1                    | 0.0                      |                          |                                                  |
| Montenegro                                              | 515.9                   | 14.3                     |                          |                                                  |
| Poland                                                  | 593.8                   | 27.2                     | 21.8                     | 2.7%                                             |
| Romania                                                 | 966.5                   | 63.4                     | 20.1                     | 4.8%                                             |
| Russian Federation                                      | 2540.0                  | 27.2                     | 64.5                     | 3.9%                                             |
| Serbia                                                  | 1657.0                  | 35.3                     | 32.9                     | 5.0%                                             |
| Slovakia                                                | 277.5                   | 5.1                      | 29.9                     | 0.9%                                             |
| Slovenia                                                | 707.6                   | 51.5                     | 36.8                     | 1.9%                                             |
| Tajikistan                                              | 325.0                   | 4.8                      |                          |                                                  |
| Turkmenistan                                            |                         |                          |                          |                                                  |
| Ukraine                                                 | 493.5                   | 14.7                     | 7.1                      | 6.9%                                             |
| Uzbekistan                                              | 99.6                    | 0.4                      |                          |                                                  |
| <b>High-income</b>                                      |                         |                          |                          |                                                  |
| Andorra                                                 | 9875.1                  | 660.1                    |                          |                                                  |
| Argentina                                               | 308.0                   | 11.1                     | 3.1                      | 9.9%                                             |
| Australia                                               | 280.0                   | 4.0                      | 52.5                     | 0.5%                                             |
| Austria                                                 | 1833.7                  | 71.6                     | 46.5                     | 3.9%                                             |
| Belgium                                                 | 4969.3                  | 808.0                    | 56.0                     | 8.9%                                             |
| Brunei                                                  | 322.3                   | 4.6                      |                          |                                                  |
| Canada                                                  | 2318.6                  | 179.2                    | 40.5                     | 5.7%                                             |
| Chile                                                   | 4304.7                  | 44.0                     | 26.9                     | 16.0%                                            |
| Cyprus                                                  | 1072.0                  | 19.4                     |                          |                                                  |
| Denmark                                                 | 1982.0                  | 97.5                     | 82.9                     | 2.4%                                             |
| Finland                                                 | 1207.8                  | 56.5                     | 31.3                     | 3.9%                                             |
| France                                                  | 2232.9                  | 438.1                    | 12.7                     | 17.5%                                            |
| Germany                                                 | 2145.0                  | 100.4                    | 47.2                     | 4.5%                                             |
| Greece                                                  | 278.5                   | 16.6                     | 16.0                     | 1.7%                                             |
| Iceland                                                 | 5289.4                  | 29.3                     | 174.6                    | 3.0%                                             |
| Ireland                                                 | 5023.1                  | 330.3                    | 66.0                     | 7.6%                                             |
| Israel                                                  | 1940.1                  | 32.5                     | 57.6                     | 3.4%                                             |
| Italy                                                   | 3822.9                  | 547.0                    | 59.7                     | 6.4%                                             |
| Japan                                                   | 131.7                   | 6.8                      | 2.2                      | 6.0%                                             |
| Luxembourg                                              | 6391.6                  | 175.7                    | 112.1                    | 5.7%                                             |
| Malta                                                   | 1392.9                  | 15.9                     |                          |                                                  |
| Netherlands                                             | 2671.0                  | 342.6                    | 19.6                     | 13.6%                                            |
| New Zealand                                             | 239.3                   | 4.6                      | 55.5                     | 0.4%                                             |
| Norway                                                  | 1546.3                  | 43.3                     | 44.2                     | 3.5%                                             |
| Portugal                                                | 3068.8                  | 133.0                    | 74.9                     | 4.1%                                             |
| Singapore                                               | 5619.5                  | 3.9                      | 37.4                     | 15.0%                                            |
| South Korea                                             | 221.3                   | 5.2                      | 16.6                     | 1.3%                                             |
| Spain                                                   | 5064.1                  | 615.0                    | 47.5                     | 10.7%                                            |

**Table 2S Regional and national rates of COVID-19 cases, deaths, and tests as of May 28, 2020**

| <b>GBD regions and countries</b>    | <b>Total cases per million</b> | <b>Total deaths per million</b> | <b>Total tests per thousand</b> | <b>Percentage of confirmed cases to tests performed</b> |
|-------------------------------------|--------------------------------|---------------------------------|---------------------------------|---------------------------------------------------------|
| Sweden                              | 3474.3                         | 417.9                           | 23.6                            | 14.7%                                                   |
| Switzerland                         | 3544.7                         | 190.3                           | 44.0                            | 8.1%                                                    |
| United Kingdom                      | 3936.6                         | 551.8                           | 31.6                            | 12.5%                                                   |
| United States                       | 5135.7                         | 303.4                           | 45.0                            | 11.4%                                                   |
| Uruguay                             | 231.2                          | 6.3                             | 11.4                            | 2.0%                                                    |
| <b>Latin America and Caribbean</b>  |                                |                                 |                                 |                                                         |
| Antigua and Barbuda                 | 255.3                          | 30.6                            |                                 |                                                         |
| Barbados                            | 320.1                          | 24.4                            |                                 |                                                         |
| Belize                              | 45.3                           | 5.0                             |                                 |                                                         |
| Bolivia                             | 665.5                          | 24.0                            | 1.1                             | 58.8%                                                   |
| Brazil                              | 1937.4                         | 120.4                           | 0.6                             | 310.9%                                                  |
| Colombia                            | 473.7                          | 15.8                            | 5.1                             | 9.2%                                                    |
| Costa Rica                          | 193.2                          | 2.0                             | 3.4                             | 5.7%                                                    |
| Cuba                                | 174.3                          | 7.2                             | 8.7                             | 2.0%                                                    |
| Dominica                            | 222.3                          | 0.0                             |                                 |                                                         |
| Dominican Republic                  | 1449.4                         | 43.7                            |                                 |                                                         |
| Ecuador                             | 2159.7                         | 185.6                           | 3.8                             | 57.4%                                                   |
| El Salvador                         | 325.2                          | 6.0                             | 12.3                            | 2.6%                                                    |
| Grenada                             | 204.4                          | 0.0                             |                                 |                                                         |
| Guatemala                           | 231.4                          | 3.8                             |                                 |                                                         |
| Guyana                              | 176.7                          | 14.0                            |                                 |                                                         |
| Haiti                               | 115.8                          | 3.0                             |                                 |                                                         |
| Honduras                            | 468.5                          | 19.6                            |                                 |                                                         |
| Jamaica                             | 192.2                          | 3.0                             |                                 |                                                         |
| Mexico                              | 605.1                          | 66.7                            | 1.6                             | 38.4%                                                   |
| Nicaragua                           | 114.6                          | 5.3                             |                                 |                                                         |
| Panama                              | 2718.1                         | 73.0                            | 13.5                            | 20.1%                                                   |
| Paraguay                            | 123.9                          | 1.5                             | 3.8                             | 3.3%                                                    |
| Peru                                | 4121.9                         | 120.8                           | 3.9                             | 106.6%                                                  |
| Saint Lucia                         | 98.0                           | 0.0                             |                                 |                                                         |
| Saint Vincent and the Grenadines    | 162.2                          | 0.0                             |                                 |                                                         |
| Suriname                            | 20.5                           | 1.7                             |                                 |                                                         |
| The Bahamas                         | 254.3                          | 28.0                            |                                 |                                                         |
| Trinidad and Tobago                 | 82.9                           | 5.7                             |                                 |                                                         |
| Venezuela                           | 43.8                           | 0.4                             |                                 |                                                         |
| <b>North Africa and Middle East</b> |                                |                                 |                                 |                                                         |
| Algeria                             | 202.0                          | 14.2                            |                                 |                                                         |
| Bahrain                             | 5661.2                         | 8.8                             | 171.1                           | 3.3%                                                    |
| Egypt                               | 192.2                          | 8.0                             |                                 |                                                         |
| Iran                                | 1685.7                         | 90.1                            | 10.2                            | 16.5%                                                   |
| Iraq                                | 127.7                          | 4.4                             |                                 |                                                         |
| Jordan                              | 70.6                           | 0.9                             |                                 |                                                         |
| Kuwait                              | 5448.2                         | 41.0                            |                                 |                                                         |
| Lebanon                             | 170.1                          | 3.8                             |                                 |                                                         |
| Libya                               | 14.4                           | 0.6                             |                                 |                                                         |
| Morocco                             | 205.9                          | 5.5                             | 2.6                             | 8.0%                                                    |
| Oman                                | 1639.6                         | 7.4                             |                                 |                                                         |
| Palestine                           | 120.2                          | 1.0                             |                                 |                                                         |
| Qatar                               | 16989.2                        | 10.4                            | 69.8                            | 24.3%                                                   |
| Saudi Arabia                        | 2256.0                         | 12.2                            | 21.7                            | 10.4%                                                   |
| Syria                               | 6.9                            | 0.2                             |                                 |                                                         |
| Tunisia                             | 88.9                           | 4.1                             | 4.2                             | 2.1%                                                    |
| Turkey                              | 1882.4                         | 52.1                            | 22.5                            | 8.4%                                                    |
| United Arab Emirates                | 3232.3                         | 25.8                            |                                 |                                                         |
| Yemen                               | 8.6                            | 1.8                             |                                 |                                                         |
| <b>South Asia</b>                   |                                |                                 |                                 |                                                         |
| Afghanistan                         | 320.0                          | 5.8                             |                                 |                                                         |
| Bangladesh                          | 232.5                          | 3.3                             | 1.6                             | 14.4%                                                   |

**Table 2S Regional and national rates of COVID-19 cases, deaths, and tests as of May 28, 2020**

| <b>GBD regions and countries</b>              | <b>Total cases per million</b> | <b>Total deaths per million</b> | <b>Total tests per thousand</b> | <b>Percentage of confirmed cases to tests performed</b> |
|-----------------------------------------------|--------------------------------|---------------------------------|---------------------------------|---------------------------------------------------------|
| Bhutan                                        | 36.3                           | 0.0                             |                                 |                                                         |
| India                                         | 114.7                          | 3.3                             | 2.3                             | 5.1%                                                    |
| Nepal                                         | 30.4                           | 0.1                             | 1.9                             | 1.6%                                                    |
| Pakistan                                      | 277.2                          | 5.7                             | 2.3                             | 12.3%                                                   |
| <b>Southeast Asia, East Asia, and Oceania</b> |                                |                                 |                                 |                                                         |
| Cambodia                                      | 7.4                            | 0.0                             |                                 |                                                         |
| China                                         | 58.4                           | 3.2                             |                                 |                                                         |
| Federated States of Micronesia                |                                |                                 |                                 |                                                         |
| Fiji                                          | 20.1                           | 0.0                             |                                 |                                                         |
| Indonesia                                     | 87.2                           | 5.4                             | 0.7                             | 12.2%                                                   |
| Kiribati                                      |                                |                                 |                                 |                                                         |
| Laos                                          | 2.6                            | 0.0                             |                                 |                                                         |
| Malaysia                                      | 235.4                          | 3.6                             | 16.1                            | 1.5%                                                    |
| Maldives                                      | 2695.4                         | 9.3                             | 37.0                            | 7.3%                                                    |
| Marshall Islands                              |                                |                                 |                                 |                                                         |
| Myanmar                                       | 3.8                            | 0.1                             | 0.4                             | 1.0%                                                    |
| North Korea                                   |                                |                                 |                                 |                                                         |
| Papua New Guinea                              | 0.9                            | 0.0                             |                                 |                                                         |
| Philippines                                   | 137.3                          | 8.3                             | 2.6                             | 5.3%                                                    |
| Samoa                                         |                                |                                 |                                 |                                                         |
| Solomon Islands                               |                                |                                 |                                 |                                                         |
| Sri Lanka                                     | 68.6                           | 0.5                             |                                 |                                                         |
| Taiwan (Province of China)                    | 18.5                           | 0.3                             | 3.0                             | 0.6%                                                    |
| Thailand                                      | 43.8                           | 0.8                             | 5.4                             | 0.8%                                                    |
| Timor-Leste                                   | 18.2                           | 0.0                             |                                 |                                                         |
| Tonga                                         |                                |                                 |                                 |                                                         |
| Vanuatu                                       |                                |                                 |                                 |                                                         |
| Vietnam                                       | 3.4                            | 0.0                             | 2.7                             | 0.1%                                                    |
| <b>Sub-Saharan Africa</b>                     |                                |                                 |                                 |                                                         |
| American Samoa                                |                                |                                 |                                 |                                                         |
| Angola                                        | 2.2                            | 0.1                             |                                 |                                                         |
| Benin                                         | 28.0                           | 0.2                             |                                 |                                                         |
| Bermuda                                       | 2232.1                         | 144.5                           |                                 |                                                         |
| Botswana                                      | 14.9                           | 0.4                             |                                 |                                                         |
| Burkina Faso                                  | 40.4                           | 2.5                             |                                 |                                                         |
| Burundi                                       | 3.5                            | 0.1                             |                                 |                                                         |
| Cameroon                                      | 204.8                          | 6.7                             |                                 |                                                         |
| Cape Verde                                    | 701.5                          | 7.2                             |                                 |                                                         |
| Central African Republic                      | 145.3                          | 0.2                             |                                 |                                                         |
| Chad                                          | 43.5                           | 3.9                             |                                 |                                                         |
| Comoros                                       | 100.0                          | 2.3                             |                                 |                                                         |
| Congo                                         | 103.5                          | 3.4                             |                                 |                                                         |
| Cote d'Ivoire                                 | 96.9                           | 1.2                             |                                 |                                                         |
| Democratic Republic of the Congo              | 29.7                           | 0.8                             |                                 |                                                         |
| Djibouti                                      | 2729.8                         | 18.2                            |                                 |                                                         |
| Equatorial Guinea                             | 743.4                          | 8.6                             |                                 |                                                         |
| Eritrea                                       | 11.0                           | 0.0                             |                                 |                                                         |
| Ethiopia                                      | 6.4                            | 0.1                             | 0.8                             | 0.8%                                                    |
| Gabon                                         | 1041.9                         | 6.3                             |                                 |                                                         |
| Ghana                                         | 235.0                          | 1.1                             | 6.5                             | 3.6%                                                    |
| Greenland                                     | 211.4                          | 0.0                             |                                 |                                                         |
| Guam                                          | 1013.1                         | 29.6                            |                                 |                                                         |
| Guinea                                        | 262.4                          | 1.6                             |                                 |                                                         |
| Guinea-Bissau                                 | 598.6                          | 3.6                             |                                 |                                                         |
| Kenya                                         | 27.4                           | 1.0                             | 1.3                             | 2.2%                                                    |
| Lesotho                                       | 0.9                            | 0.0                             |                                 |                                                         |
| Liberia                                       | 52.6                           | 5.3                             |                                 |                                                         |
| Madagascar                                    | 22.1                           | 0.1                             |                                 |                                                         |

**Table 2S Regional and national rates of COVID-19 cases, deaths, and tests as of May 28, 2020**

| GBD regions and countries            | Total cases per million | Total deaths per million | Total tests per thousand | Percentage of confirmed cases to tests performed |
|--------------------------------------|-------------------------|--------------------------|--------------------------|--------------------------------------------------|
| Malawi                               | 5.3                     | 0.2                      |                          |                                                  |
| Mali                                 | 55.1                    | 3.5                      |                          |                                                  |
| Mauritania                           | 62.8                    | 3.4                      |                          |                                                  |
| Mauritius                            | 262.6                   | 7.9                      |                          |                                                  |
| Mozambique                           | 7.3                     | 0.0                      |                          |                                                  |
| Namibia                              | 8.7                     | 0.0                      |                          |                                                  |
| Niger                                | 39.5                    | 2.6                      |                          |                                                  |
| Nigeria                              | 42.4                    | 1.2                      | 0.2                      | 18.0%                                            |
| Northern Mariana Islands             | 382.2                   | 34.7                     |                          |                                                  |
| Puerto Rico                          | 1187.4                  | 45.1                     |                          |                                                  |
| Rwanda                               | 26.7                    | 0.0                      | 4.7                      | 0.6%                                             |
| Sao Tome and Principe                | 2021.3                  | 54.8                     |                          |                                                  |
| Senegal                              | 194.3                   | 2.3                      | 2.3                      | 8.5%                                             |
| Seychelles                           | 111.9                   | 0.0                      |                          |                                                  |
| Sierra Leone                         | 98.0                    | 5.6                      |                          |                                                  |
| Somalia                              | 108.9                   | 4.2                      |                          |                                                  |
| South Africa                         | 437.3                   | 9.3                      | 10.2                     | 4.3%                                             |
| South Sudan                          | 72.0                    | 0.7                      |                          |                                                  |
| Sudan                                | 94.6                    | 4.2                      |                          |                                                  |
| Swaziland                            | 234.5                   | 1.7                      |                          |                                                  |
| Tanzania                             | 8.5                     | 0.4                      |                          |                                                  |
| The Gambia                           | 10.3                    | 0.4                      |                          |                                                  |
| Togo                                 | 47.7                    | 1.6                      |                          |                                                  |
| Uganda                               | 6.1                     | 0.0                      | 1.9                      | 0.3%                                             |
| Virgin Islands, U.S.                 | 660.8                   | 57.5                     |                          |                                                  |
| Zambia                               | 57.5                    | 0.4                      |                          |                                                  |
| Zimbabwe                             | 8.9                     | 0.3                      | 1.1                      | 0.8%                                             |
| <b>Number of countries with data</b> | <b>185</b>              | <b>185</b>               | <b>84</b>                | <b>84</b>                                        |

Number of COVID-19 confirmed cases, deaths, and number of tests were retrieved from the Worldometers

**Table 3S National and regional disability-adjusted life years (DALYs) and deaths of non-communicable and cardiovascular diseases for 195 countries according to the GBD 2017 study.**

| Countries                                        | Cause                      | DALYs                        |         |                                 | Deaths                 |         |                              |
|--------------------------------------------------|----------------------------|------------------------------|---------|---------------------------------|------------------------|---------|------------------------------|
|                                                  |                            | Number (thousand)            | Percent | Rate                            | Number (thousand)      | Percent | Rate                         |
|                                                  |                            | Mean (95% UI)                | Mean    | Mean (95% UI)                   | Mean (95% UI)          | Mean    | Mean (95% UI)                |
| <b>Global</b>                                    | All causes                 | 2499.29 (2285.52 to 2737.39) | 1.00    | 32711.25 (29913.42 to 35827.54) | 55.95 (55.36 to 56.52) | 1.00    | 732.23 (724.52 to 739.70)    |
|                                                  | Non-communicable diseases  | 1550.90 (1380.12 to 1748.21) | 0.62    | 20298.45 (18063.26 to 22880.88) | 41.07 (40.47 to 41.55) | 0.73    | 537.55 (529.69 to 543.80)    |
|                                                  | Cardiovascular diseases    | 365.87 (355.16 to 376.75)    | 0.15    | 4788.58 (4648.44 to 4930.95)    | 17.79 (17.53 to 18.04) | 0.32    | 232.85 (229.40 to 236.15)    |
|                                                  | Ischemic heart disease     | 170.28 (167.14 to 174.05)    | 0.07    | 2228.60 (2187.56 to 2277.96)    | 8.93 (8.79 to 9.14)    | 0.16    | 116.88 (115.05 to 119.61)    |
|                                                  | Stroke                     | 132.05 (126.50 to 137.35)    | 0.05    | 1728.32 (1655.64 to 1797.67)    | 6.17 (6.04 to 6.33)    | 0.11    | 80.72 (79.11 to 82.82)       |
|                                                  | Ischemic stroke            | 55.14 (50.93 to 59.42)       | 0.02    | 721.66 (666.62 to 777.66)       | 2.75 (2.66 to 2.86)    | 0.05    | 35.96 (34.78 to 37.40)       |
|                                                  | Hypertensive heart disease | 16.54 (12.74 to 17.88)       | 0.01    | 216.52 (166.78 to 233.99)       | 0.93 (0.68 to 0.99)    | 0.02    | 12.12 (8.92 to 13.02)        |
| <b>GBD super regions</b>                         |                            |                              |         |                                 |                        |         |                              |
| Central Europe, Eastern Europe, and Central Asia | All causes                 | 157.81 (143.98 to 173.42)    | 1.00    | 37942.75 (34615.89 to 41693.83) | 4.73 (4.69 to 4.77)    | 1.00    | 1137.09 (1126.79 to 1147.19) |
|                                                  | Non-communicable diseases  | 124.24 (113.13 to 136.77)    | 0.79    | 29870.30 (27200.42 to 32884.00) | 4.21 (4.18 to 4.25)    | 0.89    | 1013.35 (1003.91 to 1022.59) |
|                                                  | Cardiovascular diseases    | 46.03 (44.92 to 47.16)       | 0.29    | 11067.59 (10800.75 to 11339.18) | 2.55 (2.52 to 2.58)    | 0.54    | 612.83 (605.82 to 620.59)    |
|                                                  | Ischemic heart disease     | 25.23 (24.73 to 25.91)       | 0.16    | 6066.22 (5945.25 to 6229.47)    | 1.53 (1.50 to 1.56)    | 0.32    | 367.50 (361.83 to 376.17)    |
|                                                  | Stroke                     | 13.41 (12.81 to 13.97)       | 0.09    | 3224.92 (3080.69 to 3358.28)    | 0.71 (0.70 to 0.73)    | 0.15    | 171.61 (168.83 to 176.09)    |
|                                                  | Ischemic stroke            | 7.87 (7.40 to 8.32)          | 0.05    | 1892.20 (1779.23 to 2001.11)    | 0.45 (0.44 to 0.46)    | 0.10    | 108.65 (106.84 to 111.59)    |
|                                                  | Hypertensive heart disease | 1.15 (0.86 to 1.25)          | 0.01    | 277.46 (205.92 to 299.56)       | 0.07 (0.05 to 0.07)    | 0.01    | 16.71 (11.05 to 17.89)       |
| High-income                                      | All causes                 | 300.62 (264.12 to 342.80)    | 1.00    | 27967.30 (24571.95 to 31892.06) | 9.67 (9.55 to 9.78)    | 1.00    | 899.54 (888.77 to 909.84)    |
|                                                  | Non-communicable diseases  | 255.59 (224.41 to 291.11)    | 0.85    | 23778.16 (20877.82 to 27083.21) | 8.59 (8.48 to 8.69)    | 0.89    | 799.07 (789.08 to 808.45)    |
|                                                  | Cardiovascular diseases    | 45.48 (43.37 to 47.68)       | 0.15    | 4231.29 (4034.62 to 4435.93)    | 2.99 (2.94 to 3.04)    | 0.31    | 277.96 (273.37 to 283.23)    |
|                                                  | Ischemic heart disease     | 20.84 (20.33 to 21.49)       | 0.07    | 1938.65 (1891.41 to 1999.15)    | 1.53 (1.49 to 1.59)    | 0.16    | 142.10 (139.00 to 147.99)    |
|                                                  | Stroke                     | 12.43 (11.43 to 13.39)       | 0.04    | 1156.35 (1063.07 to 1245.33)    | 0.75 (0.73 to 0.78)    | 0.08    | 69.35 (67.75 to 72.39)       |
|                                                  | Ischemic stroke            | 6.42 (5.66 to 7.14)          | 0.02    | 597.21 (526.24 to 664.19)       | 0.39 (0.38 to 0.41)    | 0.04    | 36.36 (35.42 to 38.20)       |
|                                                  | Hypertensive heart disease | 2.02 (1.43 to 2.21)          | 0.01    | 188.08 (133.41 to 206.03)       | 0.15 (0.09 to 0.16)    | 0.02    | 13.59 (8.36 to 14.62)        |
| Latin America and Caribbean                      | All causes                 | 154.91 (139.54 to 172.08)    | 1.00    | 26619.11 (23977.92 to 29569.73) | 3.40 (3.35 to 3.44)    | 1.00    | 583.60 (576.09 to 590.62)    |
|                                                  | Non-communicable diseases  | 106.40 (93.67 to 120.96)     | 0.69    | 18282.75 (16095.66 to 20785.06) | 2.57 (2.54 to 2.60)    | 0.76    | 441.20 (435.76 to 446.57)    |
|                                                  | Cardiovascular diseases    | 19.20 (18.58 to 19.88)       | 0.12    | 3300.12 (3192.61 to 3416.93)    | 0.92 (0.90 to 0.93)    | 0.27    | 157.32 (154.88 to 159.78)    |
|                                                  | Ischemic heart disease     | 9.22 (8.95 to 9.47)          | 0.06    | 1584.84 (1538.74 to 1626.46)    | 0.48 (0.46 to 0.49)    | 0.14    | 82.02 (79.83 to 83.80)       |
|                                                  | Stroke                     | 5.47 (5.28 to 5.66)          | 0.04    | 939.18 (907.70 to 972.21)       | 0.26 (0.25 to 0.26)    | 0.08    | 44.49 (43.37 to 45.49)       |
|                                                  | Ischemic stroke            | 1.80 (1.69 to 1.92)          | 0.01    | 309.88 (290.73 to 329.67)       | 0.10 (0.10 to 0.10)    | 0.03    | 17.56 (17.04 to 17.98)       |
|                                                  | Hypertensive heart disease | 1.08 (0.98 to 1.36)          | 0.01    | 184.83 (169.09 to 233.86)       | 0.06 (0.05 to 0.08)    | 0.02    | 9.99 (8.77 to 12.97)         |
| North Africa and Middle East                     | All causes                 | 167.84 (150.55 to 186.92)    | 1.00    | 27964.53 (25084.51 to 31143.74) | 2.86 (2.79 to 2.94)    | 1.00    | 477.06 (464.37 to 490.05)    |
|                                                  | Non-communicable diseases  | 110.11 (95.92 to 126.02)     | 0.66    | 18345.83 (15982.13 to 20996.15) | 2.12 (2.06 to 2.19)    | 0.74    | 353.61 (343.56 to 364.54)    |
|                                                  | Cardiovascular diseases    | 26.27 (25.17 to 27.48)       | 0.16    | 4377.16 (4193.87 to 4578.48)    | 1.12 (1.09 to 1.16)    | 0.39    | 187.11 (181.23 to 193.44)    |
|                                                  | Ischemic heart disease     | 15.59 (14.77 to 16.46)       | 0.09    | 2597.77 (2461.36 to 2742.25)    | 0.71 (0.68 to 0.75)    | 0.25    | 118.26 (112.85 to 124.70)    |
|                                                  | Stroke                     | 6.62 (6.17 to 7.07)          | 0.04    | 1102.33 (1027.54 to 1178.48)    | 0.27 (0.25 to 0.29)    | 0.09    | 44.76 (41.86 to 47.59)       |
|                                                  | Ischemic stroke            | 3.56 (3.28 to 3.84)          | 0.02    | 593.08 (547.01 to 639.27)       | 0.16 (0.15 to 0.17)    | 0.06    | 26.99 (25.09 to 28.80)       |

**Table 3S National and regional disability-adjusted life years (DALYs) and deaths of non-communicable and cardiovascular diseases for 195 countries according to the GBD 2017 study.**

| Countries                              | Cause                      | DALYs                     |         |                                 | Deaths                 |         |                           |
|----------------------------------------|----------------------------|---------------------------|---------|---------------------------------|------------------------|---------|---------------------------|
|                                        |                            | Number (thousand)         | Percent | Rate                            | Number (thousand)      | Percent | Rate                      |
|                                        |                            | Mean (95% UI)             | Mean    | Mean (95% UI)                   | Mean (95% UI)          | Mean    | Mean (95% UI)             |
| South Asia                             | Hypertensive heart disease | 1.45 (0.91 to 1.62)       | 0.01    | 240.96 (151.11 to 270.17)       | 0.07 (0.04 to 0.08)    | 0.03    | 12.33 (7.28 to 13.84)     |
|                                        | All causes                 | 620.26 (571.07 to 677.72) | 1.00    | 34793.64 (32034.38 to 38016.97) | 12.40 (12.13 to 12.64) | 1.00    | 695.56 (680.52 to 709.31) |
|                                        | Non-communicable diseases  | 343.41 (307.74 to 384.90) | 0.55    | 19263.67 (17262.69 to 21591.08) | 7.92 (7.55 to 8.17)    | 0.64    | 444.10 (423.55 to 458.55) |
|                                        | Cardiovascular diseases    | 83.46 (80.09 to 86.41)    | 0.13    | 4681.63 (4492.75 to 4847.12)    | 3.39 (3.22 to 3.51)    | 0.27    | 189.89 (180.87 to 196.67) |
|                                        | Ischemic heart disease     | 46.18 (44.28 to 47.97)    | 0.07    | 2590.53 (2484.01 to 2690.65)    | 1.92 (1.83 to 2.00)    | 0.15    | 107.64 (102.55 to 112.22) |
|                                        | Stroke                     | 24.34 (23.17 to 25.45)    | 0.04    | 1365.23 (1299.93 to 1427.54)    | 1.02 (0.97 to 1.07)    | 0.08    | 57.19 (54.13 to 59.88)    |
|                                        | Ischemic stroke            | 8.75 (7.41 to 10.49)      | 0.01    | 491.00 (415.61 to 588.68)       | 0.41 (0.35 to 0.50)    | 0.03    | 23.14 (19.75 to 27.84)    |
| Southeast Asia, East Asia, and Oceania | Hypertensive heart disease | 2.58 (1.97 to 3.20)       | 0.00    | 144.97 (110.60 to 179.61)       | 0.12 (0.09 to 0.15)    | 0.01    | 6.99 (5.32 to 8.60)       |
|                                        | All causes                 | 590.25 (534.07 to 655.58) | 1.00    | 27341.60 (24739.00 to 30367.62) | 15.41 (15.08 to 15.75) | 1.00    | 713.88 (698.47 to 729.72) |
|                                        | Non-communicable diseases  | 459.85 (411.75 to 515.97) | 0.78    | 21301.25 (19072.91 to 23900.89) | 13.09 (12.79 to 13.43) | 0.85    | 606.41 (592.67 to 621.96) |
|                                        | Cardiovascular diseases    | 122.56 (118.01 to 127.21) | 0.21    | 5677.22 (5466.53 to 5892.72)    | 5.96 (5.81 to 6.11)    | 0.39    | 275.91 (269.21 to 283.01) |
|                                        | Ischemic heart disease     | 44.76 (43.46 to 46.13)    | 0.08    | 2073.42 (2012.94 to 2136.97)    | 2.40 (2.34 to 2.47)    | 0.16    | 111.12 (108.19 to 114.19) |
|                                        | Stroke                     | 61.66 (58.85 to 64.52)    | 0.10    | 2856.19 (2726.23 to 2988.61)    | 2.84 (2.77 to 2.93)    | 0.18    | 131.71 (128.19 to 135.81) |
|                                        | Ischemic stroke            | 24.29 (22.23 to 26.32)    | 0.04    | 1124.94 (1029.76 to 1219.14)    | 1.12 (1.08 to 1.16)    | 0.07    | 51.79 (50.10 to 53.58)    |
| Sub-Saharan Africa                     | Hypertensive heart disease | 6.66 (4.72 to 7.25)       | 0.01    | 308.68 (218.79 to 335.92)       | 0.38 (0.26 to 0.41)    | 0.02    | 17.70 (11.90 to 19.22)    |
|                                        | All causes                 | 507.60 (477.65 to 543.66) | 1.00    | 49472.07 (46552.81 to 52985.89) | 7.48 (7.21 to 7.81)    | 1.00    | 728.71 (702.47 to 761.46) |
|                                        | Non-communicable diseases  | 151.30 (133.37 to 171.75) | 0.30    | 14746.32 (12998.59 to 16739.18) | 2.57 (2.43 to 2.75)    | 0.34    | 250.40 (236.48 to 268.17) |
|                                        | Cardiovascular diseases    | 22.86 (21.51 to 24.30)    | 0.05    | 2228.06 (2096.14 to 2368.79)    | 0.87 (0.83 to 0.93)    | 0.12    | 85.19 (80.47 to 90.93)    |
|                                        | Ischemic heart disease     | 8.45 (7.81 to 9.25)       | 0.02    | 823.53 (761.54 to 901.38)       | 0.37 (0.34 to 0.41)    | 0.05    | 36.01 (33.13 to 39.52)    |
|                                        | Stroke                     | 8.13 (7.58 to 8.67)       | 0.02    | 792.36 (738.75 to 845.36)       | 0.32 (0.29 to 0.34)    | 0.04    | 30.97 (28.74 to 33.59)    |
|                                        | Ischemic stroke            | 2.45 (2.12 to 2.79)       | 0.00    | 238.56 (207.06 to 272.37)       | 0.11 (0.09 to 0.13)    | 0.01    | 10.73 (9.19 to 12.30)     |
|                                        | Hypertensive heart disease | 1.60 (1.03 to 2.06)       | 0.00    | 155.69 (100.76 to 200.41)       | 0.07 (0.05 to 0.10)    | 0.01    | 6.94 (4.49 to 9.26)       |
| <b>World Bank income level regions</b> |                            |                           |         |                                 |                        |         |                           |
| World Bank High Income                 | All causes                 | 332.62 (292.69 to 379.53) | 1.00    | 27962.08 (24604.84 to 31905.26) | 10.50 (10.38 to 10.61) | 1.00    | 882.56 (872.97 to 891.63) |
|                                        | Non-communicable diseases  | 281.83 (247.27 to 320.74) | 0.85    | 23691.99 (20786.54 to 26962.76) | 9.33 (9.23 to 9.43)    | 0.89    | 784.51 (775.53 to 792.79) |
|                                        | Cardiovascular diseases    | 51.89 (49.50 to 54.39)    | 0.16    | 4362.40 (4160.84 to 4572.38)    | 3.34 (3.29 to 3.40)    | 0.32    | 280.60 (276.48 to 285.56) |
|                                        | Ischemic heart disease     | 24.32 (23.74 to 25.09)    | 0.07    | 2044.41 (1995.90 to 2109.49)    | 1.74 (1.71 to 1.81)    | 0.17    | 146.50 (143.39 to 152.49) |
|                                        | Stroke                     | 14.17 (13.07 to 15.23)    | 0.04    | 1191.48 (1098.41 to 1280.16)    | 0.83 (0.81 to 0.87)    | 0.08    | 69.73 (68.22 to 72.75)    |
|                                        | Ischemic stroke            | 7.55 (6.69 to 8.36)       | 0.02    | 634.33 (562.68 to 702.81)       | 0.45 (0.44 to 0.47)    | 0.04    | 37.72 (36.82 to 39.53)    |
|                                        | Hypertensive heart disease | 2.27 (1.61 to 2.49)       | 0.01    | 191.12 (135.57 to 208.96)       | 0.16 (0.10 to 0.17)    | 0.02    | 13.47 (8.37 to 14.44)     |
| World Bank Upper Middle Income         | All causes                 | 729.07 (658.67 to 810.80) | 1.00    | 27669.32 (24997.81 to 30771.38) | 18.94 (18.62 to 19.25) | 1.00    | 718.68 (706.56 to 730.51) |
|                                        | Non-communicable diseases  | 561.21 (500.42 to 631.52) | 0.77    | 21298.92 (18991.72 to 23967.28) | 16.07 (15.79 to 16.35) | 0.85    | 609.96 (599.38 to 620.65) |
|                                        | Cardiovascular diseases    | 147.38 (142.47 to 152.67) | 0.20    | 5593.41 (5406.94 to 5794.14)    | 7.55 (7.41 to 7.69)    | 0.40    | 286.57 (281.26 to 291.92) |
|                                        | Ischemic heart disease     | 61.19 (59.85 to 62.71)    | 0.08    | 2322.35 (2271.56 to 2379.93)    | 3.48 (3.41 to 3.55)    | 0.18    | 131.91 (129.54 to 134.54) |
|                                        | Stroke                     | 63.14 (60.12 to 66.22)    | 0.09    | 2396.16 (2281.59 to 2513.24)    | 3.06 (2.98 to 3.14)    | 0.16    | 115.99 (113.22 to 119.20) |
|                                        | Ischemic stroke            | 27.87 (25.62 to 30.07)    | 0.04    | 1057.76 (972.38 to 1141.21)     | 1.37 (1.33 to 1.40)    | 0.07    | 51.88 (50.63 to 53.19)    |

**Table 3S National and regional disability-adjusted life years (DALYs) and deaths of non-communicable and cardiovascular diseases for 195 countries according to the GBD 2017 study.**

| Countries                      | Cause                      | DALYs                           |         |                                 | Deaths                    |         |                           |
|--------------------------------|----------------------------|---------------------------------|---------|---------------------------------|---------------------------|---------|---------------------------|
|                                |                            | Number (thousand)               | Percent | Rate                            | Number (thousand)         | Percent | Rate                      |
|                                |                            | Mean (95% UI)                   | Mean    | Mean (95% UI)                   | Mean (95% UI)             | Mean    | Mean (95% UI)             |
| World Bank Lower Middle Income | Hypertensive heart disease | 7.52 (5.69 to 8.15)             | 0.01    | 285.45 (215.98 to 309.32)       | 0.45 (0.32 to 0.49)       | 0.02    | 17.11 (12.15 to 18.52)    |
|                                | All causes                 | 1109.50 (1024.62 to 1208.48)    | 1.00    | 35551.81 (32832.24 to 38723.56) | 21.47 (21.03 to 21.93)    | 1.00    | 688.02 (674.01 to 702.78) |
|                                | Non-communicable diseases  | 595.58 (532.75 to 668.96)       | 0.54    | 19084.26 (17071.08 to 21435.58) | 13.56 (13.14 to 13.92)    | 0.63    | 434.61 (420.93 to 445.92) |
|                                | Cardiovascular diseases    | 146.23 (141.48 to 150.58)       | 0.13    | 4685.64 (4533.35 to 4825.17)    | 6.10 (5.92 to 6.27)       | 0.28    | 195.61 (189.77 to 200.96) |
|                                | Ischemic heart disease     | 76.72 (74.46 to 79.03)          | 0.07    | 2458.43 (2385.95 to 2532.48)    | 3.36 (3.26 to 3.46)       | 0.16    | 107.77 (104.51 to 110.98) |
|                                | Stroke                     | 47.06 (45.23 to 48.84)          | 0.04    | 1508.10 (1449.42 to 1564.95)    | 1.98 (1.90 to 2.05)       | 0.09    | 63.31 (60.97 to 65.66)    |
|                                | Ischemic stroke            | 17.26 (15.59 to 19.40)          | 0.02    | 553.03 (499.62 to 621.68)       | 0.82 (0.75 to 0.92)       | 0.04    | 26.34 (23.94 to 29.45)    |
| World Bank Low Income          | Hypertensive heart disease | 5.43 (4.27 to 6.24)             | 0.00    | 173.89 (136.98 to 200.10)       | 0.25 (0.20 to 0.29)       | 0.01    | 8.13 (6.49 to 9.30)       |
|                                | All causes                 | 320.25 (301.33 to 341.45)       | 1.00    | 48030.11 (45192.39 to 51210.71) | 4.83 (4.70 to 4.95)       | 1.00    | 724.04 (705.29 to 741.81) |
|                                | Non-communicable diseases  | 106.09 (94.62 to 118.67)        | 0.33    | 15910.57 (14190.80 to 17798.17) | 1.92 (1.84 to 2.00)       | 0.40    | 287.97 (275.44 to 299.99) |
|                                | Cardiovascular diseases    | 18.69 (17.73 to 19.58)          | 0.06    | 2803.09 (2658.78 to 2936.56)    | 0.71 (0.68 to 0.75)       | 0.15    | 107.00 (101.97 to 112.26) |
|                                | Ischemic heart disease     | 7.43 (6.97 to 7.93)             | 0.02    | 1113.66 (1045.59 to 1189.68)    | 0.31 (0.29 to 0.34)       | 0.07    | 47.08 (43.83 to 50.64)    |
|                                | Stroke                     | 6.85 (6.42 to 7.21)             | 0.02    | 1027.21 (962.76 to 1080.81)     | 0.27 (0.25 to 0.28)       | 0.06    | 40.03 (37.33 to 42.62)    |
|                                | Ischemic stroke            | 2.12 (1.85 to 2.40)             | 0.01    | 318.24 (277.98 to 359.46)       | 0.09 (0.08 to 0.11)       | 0.02    | 14.10 (11.96 to 16.01)    |
|                                | Hypertensive heart disease | 1.23 (0.77 to 1.63)             | 0.00    | 183.97 (115.57 to 244.91)       | 0.06 (0.03 to 0.08)       | 0.01    | 8.28 (5.12 to 11.46)      |
| <b>GBD nations</b>             |                            |                                 |         |                                 |                           |         |                           |
| Afghanistan                    | All causes                 | 16307.23 (14399.69 to 18288.65) | 1.00    | 49634.29 (43828.32 to 55665.15) | 226.65 (202.69 to 253.55) | 1.00    | 689.85 (616.94 to 771.74) |
|                                | Non-communicable diseases  | 6948.56 (6058.38 to 7934.18)    | 0.43    | 21149.32 (18439.87 to 24149.24) | 116.29 (103.23 to 130.40) | 0.51    | 353.96 (314.19 to 396.89) |
|                                | Cardiovascular diseases    | 1637.82 (1401.52 to 1893.59)    | 0.10    | 4985.02 (4265.81 to 5763.53)    | 56.12 (49.28 to 62.91)    | 0.25    | 170.81 (150.01 to 191.48) |
|                                | Ischemic heart disease     | 936.16 (783.69 to 1105.46)      | 0.06    | 2849.39 (2385.31 to 3364.68)    | 33.68 (29.24 to 38.71)    | 0.15    | 102.52 (89.00 to 117.83)  |
|                                | Stroke                     | 470.53 (401.20 to 551.68)       | 0.03    | 1432.14 (1221.14 to 1679.14)    | 15.60 (13.53 to 17.95)    | 0.07    | 47.50 (41.18 to 54.64)    |
|                                | Ischemic stroke            | 215.81 (183.17 to 253.70)       | 0.01    | 656.86 (557.50 to 772.20)       | 8.27 (7.06 to 9.58)       | 0.04    | 25.17 (21.48 to 29.16)    |
|                                | Hypertensive heart disease | 89.60 (39.05 to 125.76)         | 0.01    | 272.71 (118.87 to 382.78)       | 3.61 (1.58 to 4.78)       | 0.02    | 10.98 (4.81 to 14.56)     |
| Albania                        | All causes                 | 769.54 (653.15 to 884.64)       | 1.00    | 27819.79 (23612.06 to 31980.70) | 21.76 (18.73 to 25.05)    | 1.00    | 786.53 (677.08 to 905.68) |
|                                | Non-communicable diseases  | 627.63 (532.49 to 721.45)       | 0.82    | 22689.46 (19250.24 to 26081.16) | 20.27 (17.40 to 23.41)    | 0.93    | 732.62 (629.10 to 846.20) |
|                                | Cardiovascular diseases    | 209.56 (181.48 to 241.62)       | 0.27    | 7575.95 (6560.59 to 8734.81)    | 12.14 (10.48 to 14.05)    | 0.56    | 439.05 (378.73 to 508.09) |
|                                | Ischemic heart disease     | 96.44 (81.29 to 113.57)         | 0.13    | 3486.51 (2938.55 to 4105.60)    | 5.87 (4.99 to 6.89)       | 0.27    | 212.30 (180.48 to 249.07) |
|                                | Stroke                     | 77.73 (67.20 to 89.81)          | 0.10    | 2810.13 (2429.32 to 3246.64)    | 4.84 (4.11 to 5.61)       | 0.22    | 174.98 (148.64 to 202.79) |
|                                | Ischemic stroke            | 17.27 (14.54 to 20.10)          | 0.02    | 624.33 (525.69 to 726.59)       | 0.74 (0.62 to 0.87)       | 0.03    | 26.71 (22.43 to 31.51)    |
|                                | Hypertensive heart disease | 2.11 (1.72 to 2.89)             | 0.00    | 76.24 (62.19 to 104.47)         | 0.13 (0.10 to 0.18)       | 0.01    | 4.62 (3.71 to 6.35)       |
| Algeria                        | All causes                 | 9288.02 (8126.94 to 10578.39)   | 1.00    | 22953.96 (20084.51 to 26142.90) | 167.91 (161.07 to 174.98) | 1.00    | 414.96 (398.05 to 432.43) |
|                                | Non-communicable diseases  | 7036.44 (6025.85 to 8176.51)    | 0.76    | 17389.52 (14891.99 to 20207.02) | 139.17 (132.99 to 145.12) | 0.83    | 343.93 (328.68 to 358.63) |
|                                | Cardiovascular diseases    | 1607.33 (1500.94 to 1703.79)    | 0.17    | 3972.28 (3709.35 to 4210.65)    | 79.39 (75.56 to 83.17)    | 0.47    | 196.20 (186.74 to 205.55) |
|                                | Ischemic heart disease     | 918.61 (837.75 to 1021.12)      | 0.10    | 2270.22 (2070.38 to 2523.55)    | 49.21 (45.34 to 54.22)    | 0.29    | 121.62 (112.06 to 134.00) |
|                                | Stroke                     | 408.07 (358.24 to 456.59)       | 0.04    | 1008.47 (885.35 to 1128.39)     | 19.19 (16.77 to 21.62)    | 0.11    | 47.42 (41.45 to 53.43)    |
|                                | Ischemic stroke            | 244.46 (212.92 to 277.10)       | 0.03    | 604.15 (526.19 to 684.82)       | 13.01 (11.26 to 14.85)    | 0.08    | 32.15 (27.82 to 36.70)    |



**Table 3S National and regional disability-adjusted life years (DALYs) and deaths of non-communicable and cardiovascular diseases for 195 countries according to the GBD 2017 study.**

| Countries           | Cause                      | DALYs                           |         |                                 | Deaths                    |         |                           |
|---------------------|----------------------------|---------------------------------|---------|---------------------------------|---------------------------|---------|---------------------------|
|                     |                            | Number (thousand)               | Percent | Rate                            | Number (thousand)         | Percent | Rate                      |
|                     |                            | Mean (95% UI)                   | Mean    | Mean (95% UI)                   | Mean (95% UI)             | Mean    | Mean (95% UI)             |
| American Samoa      | Hypertensive heart disease | 109.36 (50.40 to 153.38)        | 0.01    | 270.25 (124.55 to 379.06)       | 6.01 (2.41 to 8.74)       | 0.04    | 14.85 (5.95 to 21.61)     |
|                     | All causes                 | 15.60 (13.85 to 17.41)          | 1.00    | 28049.05 (24904.24 to 31288.98) | 0.33 (0.30 to 0.35)       | 1.00    | 589.51 (541.31 to 637.16) |
|                     | Non-communicable diseases  | 12.23 (10.80 to 13.77)          | 0.78    | 21992.36 (19421.63 to 24755.08) | 0.28 (0.25 to 0.30)       | 0.84    | 496.87 (454.58 to 540.27) |
|                     | Cardiovascular diseases    | 2.78 (2.53 to 3.04)             | 0.18    | 4989.03 (4545.94 to 5462.71)    | 0.10 (0.09 to 0.11)       | 0.30    | 179.49 (162.48 to 196.54) |
|                     | Ischemic heart disease     | 1.28 (1.14 to 1.43)             | 0.08    | 2300.17 (2053.40 to 2561.87)    | 0.05 (0.04 to 0.06)       | 0.15    | 89.39 (80.03 to 99.06)    |
|                     | Stroke                     | 0.86 (0.78 to 0.94)             | 0.06    | 1546.74 (1404.79 to 1694.33)    | 0.03 (0.03 to 0.03)       | 0.09    | 54.77 (49.39 to 60.56)    |
|                     | Ischemic stroke            | 0.22 (0.19 to 0.25)             | 0.01    | 398.04 (347.12 to 445.34)       | 0.01 (0.01 to 0.01)       | 0.02    | 14.02 (12.51 to 15.61)    |
| Andorra             | Hypertensive heart disease | 0.12 (0.10 to 0.14)             | 0.01    | 211.71 (181.57 to 252.79)       | 0.00 (0.00 to 0.01)       | 0.01    | 8.04 (6.84 to 9.66)       |
|                     | All causes                 | 19.40 (16.60 to 22.50)          | 1.00    | 24265.59 (20752.59 to 28140.50) | 0.56 (0.51 to 0.61)       | 1.00    | 699.65 (638.26 to 762.39) |
|                     | Non-communicable diseases  | 16.83 (14.39 to 19.56)          | 0.87    | 21045.48 (17994.47 to 24465.40) | 0.50 (0.45 to 0.54)       | 0.89    | 623.32 (568.31 to 679.56) |
|                     | Cardiovascular diseases    | 2.67 (2.43 to 2.96)             | 0.14    | 3342.91 (3043.66 to 3703.17)    | 0.17 (0.16 to 0.19)       | 0.31    | 214.39 (194.62 to 236.84) |
|                     | Ischemic heart disease     | 1.21 (1.07 to 1.38)             | 0.06    | 1513.31 (1343.95 to 1730.97)    | 0.08 (0.07 to 0.09)       | 0.15    | 104.04 (92.53 to 117.79)  |
|                     | Stroke                     | 0.68 (0.60 to 0.76)             | 0.04    | 851.07 (755.14 to 953.11)       | 0.04 (0.04 to 0.05)       | 0.08    | 56.12 (49.22 to 63.65)    |
|                     | Ischemic stroke            | 0.33 (0.29 to 0.38)             | 0.02    | 417.23 (360.57 to 474.21)       | 0.02 (0.02 to 0.03)       | 0.04    | 28.14 (24.08 to 32.27)    |
| Angola              | Hypertensive heart disease | 0.05 (0.04 to 0.07)             | 0.00    | 68.21 (53.69 to 84.35)          | 0.00 (0.00 to 0.00)       | 0.01    | 4.27 (3.25 to 5.42)       |
|                     | All causes                 | 13114.80 (11517.27 to 14927.92) | 1.00    | 46502.58 (40838.04 to 52931.58) | 184.36 (163.28 to 206.00) | 1.00    | 653.69 (578.96 to 730.42) |
|                     | Non-communicable diseases  | 4181.84 (3603.85 to 4813.45)    | 0.32    | 14828.00 (12778.58 to 17067.58) | 64.30 (56.59 to 72.39)    | 0.35    | 228.00 (200.64 to 256.68) |
|                     | Cardiovascular diseases    | 604.41 (527.32 to 684.16)       | 0.05    | 2143.12 (1869.78 to 2425.91)    | 21.78 (18.98 to 24.83)    | 0.12    | 77.24 (67.32 to 88.03)    |
|                     | Ischemic heart disease     | 217.34 (180.77 to 256.95)       | 0.02    | 770.63 (640.96 to 911.09)       | 8.82 (7.44 to 10.42)      | 0.05    | 31.29 (26.37 to 36.93)    |
|                     | Stroke                     | 199.55 (170.74 to 228.83)       | 0.02    | 707.56 (605.42 to 811.40)       | 7.35 (6.28 to 8.53)       | 0.04    | 26.06 (22.27 to 30.26)    |
|                     | Ischemic stroke            | 53.84 (45.87 to 63.08)          | 0.00    | 190.91 (162.65 to 223.66)       | 2.22 (1.84 to 2.66)       | 0.01    | 7.86 (6.52 to 9.42)       |
| Antigua and Barbuda | Hypertensive heart disease | 56.68 (32.56 to 77.31)          | 0.00    | 200.97 (115.44 to 274.14)       | 2.41 (1.40 to 3.30)       | 0.01    | 8.54 (4.96 to 11.71)      |
|                     | All causes                 | 22.84 (20.19 to 25.90)          | 1.00    | 25675.70 (22695.66 to 29113.43) | 0.56 (0.53 to 0.59)       | 1.00    | 633.25 (598.85 to 665.00) |
|                     | Non-communicable diseases  | 17.79 (15.64 to 20.23)          | 0.78    | 19993.08 (17580.75 to 22736.25) | 0.48 (0.45 to 0.50)       | 0.84    | 534.57 (506.66 to 559.79) |
|                     | Cardiovascular diseases    | 3.66 (3.45 to 3.89)             | 0.16    | 4118.30 (3881.15 to 4371.33)    | 0.19 (0.18 to 0.20)       | 0.33    | 209.96 (198.80 to 220.79) |
|                     | Ischemic heart disease     | 1.30 (1.21 to 1.39)             | 0.06    | 1456.99 (1363.23 to 1566.39)    | 0.07 (0.07 to 0.08)       | 0.13    | 82.82 (77.33 to 88.50)    |
|                     | Stroke                     | 1.13 (1.06 to 1.21)             | 0.05    | 1270.62 (1189.10 to 1361.32)    | 0.06 (0.05 to 0.06)       | 0.10    | 64.85 (60.48 to 69.51)    |
|                     | Ischemic stroke            | 0.42 (0.39 to 0.46)             | 0.02    | 473.64 (436.77 to 516.09)       | 0.02 (0.02 to 0.03)       | 0.04    | 27.90 (25.80 to 30.22)    |
| Argentina           | Hypertensive heart disease | 0.40 (0.32 to 0.46)             | 0.02    | 454.87 (357.34 to 520.26)       | 0.02 (0.02 to 0.02)       | 0.04    | 24.26 (18.38 to 27.73)    |
|                     | All causes                 | 11856.98 (10441.39 to 13425.90) | 1.00    | 26785.80 (23587.88 to 30330.11) | 332.47 (306.01 to 363.64) | 1.00    | 751.06 (691.30 to 821.48) |
|                     | Non-communicable diseases  | 8999.39 (7822.11 to 10325.51)   | 0.76    | 20330.29 (17670.74 to 23326.10) | 268.45 (246.62 to 293.77) | 0.81    | 606.45 (557.14 to 663.64) |
|                     | Cardiovascular diseases    | 1874.06 (1703.71 to 2065.94)    | 0.16    | 4233.63 (3848.82 to 4667.11)    | 105.78 (96.99 to 115.57)  | 0.32    | 238.96 (219.10 to 261.08) |
|                     | Ischemic heart disease     | 860.69 (776.57 to 952.19)       | 0.07    | 1944.36 (1754.33 to 2151.06)    | 53.94 (49.30 to 59.00)    | 0.16    | 121.85 (111.37 to 133.28) |
|                     | Stroke                     | 485.88 (438.29 to 535.80)       | 0.04    | 1097.63 (990.13 to 1210.42)     | 23.78 (21.50 to 26.17)    | 0.07    | 53.72 (48.56 to 59.12)    |
|                     | Ischemic stroke            | 168.74 (148.80 to 189.34)       | 0.01    | 381.20 (336.15 to 427.73)       | 9.12 (8.24 to 10.09)      | 0.03    | 20.61 (18.61 to 22.78)    |
|                     | Hypertensive heart disease | 92.41 (79.95 to 121.18)         | 0.01    | 208.76 (180.62 to 273.74)       | 6.21 (5.26 to 8.21)       | 0.02    | 14.03 (11.88 to 18.56)    |

**Table 3S National and regional disability-adjusted life years (DALYs) and deaths of non-communicable and cardiovascular diseases for 195 countries according to the GBD 2017 study.**

| Countries  | Cause                      | DALYs                           |         |                                 | Deaths                    |         |                           |
|------------|----------------------------|---------------------------------|---------|---------------------------------|---------------------------|---------|---------------------------|
|            |                            | Number (thousand)               | Percent | Rate                            | Number (thousand)         | Percent | Rate                      |
|            |                            | Mean (95% UI)                   | Mean    | Mean (95% UI)                   | Mean (95% UI)             | Mean    | Mean (95% UI)             |
| Armenia    | All causes                 | 911.39 (819.94 to 1019.65)      | 1.00    | 30106.52 (27085.36 to 33682.58) | 28.29 (27.59 to 29.04)    | 1.00    | 934.65 (911.26 to 959.35) |
|            | Non-communicable diseases  | 769.01 (694.20 to 856.50)       | 0.84    | 25403.18 (22931.73 to 28293.30) | 26.37 (25.69 to 27.10)    | 0.93    | 871.24 (848.68 to 895.13) |
|            | Cardiovascular diseases    | 235.34 (226.68 to 243.91)       | 0.26    | 7774.18 (7488.14 to 8057.35)    | 13.63 (13.24 to 14.03)    | 0.48    | 450.28 (437.24 to 463.43) |
|            | Ischemic heart disease     | 153.33 (147.70 to 159.04)       | 0.17    | 5064.91 (4878.99 to 5253.74)    | 9.43 (9.11 to 9.89)       | 0.33    | 311.61 (300.88 to 326.63) |
|            | Stroke                     | 50.79 (47.48 to 53.92)          | 0.06    | 1677.93 (1568.44 to 1781.27)    | 2.62 (2.50 to 2.76)       | 0.09    | 86.48 (82.45 to 91.08)    |
|            | Ischemic stroke            | 29.47 (27.15 to 31.74)          | 0.03    | 973.61 (896.79 to 1048.64)      | 1.58 (1.50 to 1.68)       | 0.06    | 52.15 (49.40 to 55.57)    |
|            | Hypertensive heart disease | 7.91 (4.03 to 9.03)             | 0.01    | 261.38 (132.98 to 298.31)       | 0.59 (0.19 to 0.69)       | 0.02    | 19.40 (6.27 to 22.90)     |
| Australia  | All causes                 | 5868.04 (5067.01 to 6792.38)    | 1.00    | 24508.29 (21162.71 to 28368.85) | 170.87 (156.98 to 185.43) | 1.00    | 713.66 (655.62 to 774.46) |
|            | Non-communicable diseases  | 4880.08 (4218.12 to 5624.14)    | 0.83    | 20382.00 (17617.29 to 23489.63) | 155.10 (142.75 to 168.38) | 0.91    | 647.78 (596.19 to 703.26) |
|            | Cardiovascular diseases    | 724.10 (664.26 to 790.09)       | 0.12    | 3024.26 (2774.32 to 3299.86)    | 52.10 (48.27 to 56.53)    | 0.30    | 217.60 (201.60 to 236.09) |
|            | Ischemic heart disease     | 347.20 (316.00 to 380.75)       | 0.06    | 1450.09 (1319.78 to 1590.24)    | 27.70 (25.50 to 30.06)    | 0.16    | 115.67 (106.49 to 125.53) |
|            | Stroke                     | 177.26 (160.39 to 194.43)       | 0.03    | 740.32 (669.86 to 812.03)       | 12.51 (11.44 to 13.67)    | 0.07    | 52.24 (47.78 to 57.08)    |
|            | Ischemic stroke            | 93.77 (82.74 to 104.47)         | 0.02    | 391.64 (345.58 to 436.35)       | 6.76 (6.17 to 7.41)       | 0.04    | 28.25 (25.79 to 30.93)    |
|            | Hypertensive heart disease | 15.07 (13.00 to 18.96)          | 0.00    | 62.95 (54.30 to 79.17)          | 1.20 (0.91 to 1.47)       | 0.01    | 5.00 (3.80 to 6.16)       |
| Austria    | All causes                 | 2396.29 (2080.21 to 2744.46)    | 1.00    | 27251.82 (23657.28 to 31211.39) | 81.37 (77.97 to 85.12)    | 1.00    | 925.40 (886.71 to 968.02) |
|            | Non-communicable diseases  | 2089.18 (1812.28 to 2389.00)    | 0.87    | 23759.23 (20610.22 to 27168.96) | 75.79 (72.54 to 79.30)    | 0.93    | 861.93 (824.99 to 901.89) |
|            | Cardiovascular diseases    | 413.79 (387.24 to 440.80)       | 0.17    | 4705.87 (4403.95 to 5013.03)    | 31.39 (29.91 to 32.90)    | 0.39    | 356.94 (340.20 to 374.12) |
|            | Ischemic heart disease     | 209.34 (196.38 to 227.09)       | 0.09    | 2380.73 (2233.38 to 2582.60)    | 17.73 (16.66 to 19.66)    | 0.22    | 201.60 (189.50 to 223.61) |
|            | Stroke                     | 79.09 (71.14 to 87.27)          | 0.03    | 899.45 (809.08 to 992.45)       | 4.86 (4.50 to 5.43)       | 0.06    | 55.22 (51.20 to 61.75)    |
|            | Ischemic stroke            | 44.32 (38.63 to 50.10)          | 0.02    | 503.98 (439.27 to 569.76)       | 2.71 (2.49 to 3.08)       | 0.03    | 30.87 (28.32 to 34.97)    |
|            | Hypertensive heart disease | 25.44 (14.21 to 28.85)          | 0.01    | 289.36 (161.58 to 328.07)       | 2.45 (0.91 to 2.87)       | 0.03    | 27.88 (10.35 to 32.64)    |
| Azerbaijan | All causes                 | 3226.37 (2905.69 to 3607.57)    | 1.00    | 31553.63 (28417.40 to 35281.76) | 75.51 (71.27 to 80.24)    | 1.00    | 738.50 (696.99 to 784.76) |
|            | Non-communicable diseases  | 2366.33 (2129.06 to 2643.43)    | 0.73    | 23142.57 (20822.01 to 25852.52) | 65.60 (62.04 to 69.63)    | 0.87    | 641.60 (606.72 to 680.97) |
|            | Cardiovascular diseases    | 844.71 (793.79 to 903.27)       | 0.26    | 8261.22 (7763.23 to 8833.88)    | 40.27 (38.00 to 42.88)    | 0.53    | 393.80 (371.59 to 419.34) |
|            | Ischemic heart disease     | 537.72 (499.87 to 579.40)       | 0.17    | 5258.83 (4888.69 to 5666.46)    | 27.27 (25.53 to 29.14)    | 0.36    | 266.68 (249.64 to 285.00) |
|            | Stroke                     | 209.46 (193.61 to 226.08)       | 0.07    | 2048.54 (1893.48 to 2211.06)    | 9.71 (8.96 to 10.55)      | 0.13    | 94.97 (87.63 to 103.15)   |
|            | Ischemic stroke            | 54.58 (48.74 to 60.38)          | 0.02    | 533.82 (476.64 to 590.48)       | 2.43 (2.19 to 2.69)       | 0.03    | 23.74 (21.40 to 26.35)    |
|            | Hypertensive heart disease | 14.79 (12.63 to 20.14)          | 0.00    | 144.65 (123.47 to 196.92)       | 0.69 (0.57 to 0.99)       | 0.01    | 6.74 (5.62 to 9.67)       |
| Bahrain    | All causes                 | 272.66 (227.30 to 322.59)       | 1.00    | 18543.73 (15458.81 to 21939.13) | 3.33 (3.09 to 3.59)       | 1.00    | 226.21 (210.12 to 244.01) |
|            | Non-communicable diseases  | 225.09 (185.80 to 267.24)       | 0.83    | 15308.37 (12636.53 to 18174.73) | 2.80 (2.60 to 3.02)       | 0.84    | 190.64 (176.82 to 205.53) |
|            | Cardiovascular diseases    | 28.63 (25.89 to 31.47)          | 0.11    | 1947.29 (1760.51 to 2140.49)    | 0.96 (0.88 to 1.05)       | 0.29    | 65.38 (59.73 to 71.50)    |
|            | Ischemic heart disease     | 17.63 (15.87 to 19.49)          | 0.07    | 1199.25 (1079.15 to 1325.78)    | 0.66 (0.60 to 0.72)       | 0.20    | 44.87 (40.76 to 49.18)    |
|            | Stroke                     | 6.05 (5.35 to 6.78)             | 0.02    | 411.31 (363.64 to 460.86)       | 0.17 (0.15 to 0.18)       | 0.05    | 11.42 (10.32 to 12.57)    |
|            | Ischemic stroke            | 2.66 (2.27 to 3.06)             | 0.01    | 181.13 (154.15 to 208.01)       | 0.07 (0.07 to 0.08)       | 0.02    | 4.93 (4.43 to 5.51)       |
|            | Hypertensive heart disease | 0.80 (0.69 to 0.94)             | 0.00    | 54.66 (47.09 to 64.17)          | 0.03 (0.02 to 0.04)       | 0.01    | 1.78 (1.52 to 2.44)       |
| Bangladesh | All causes                 | 45956.81 (40978.61 to 51428.77) | 1.00    | 29275.39 (26104.18 to 32761.14) | 887.22 (815.99 to 963.53) | 1.00    | 565.18 (519.80 to 613.79) |

**Table 3S National and regional disability-adjusted life years (DALYs) and deaths of non-communicable and cardiovascular diseases for 195 countries according to the GBD 2017 study.**

| Countries | Cause                      | DALYs                           |         |                                 | Deaths                    |         |                              |
|-----------|----------------------------|---------------------------------|---------|---------------------------------|---------------------------|---------|------------------------------|
|           |                            | Number (thousand)               | Percent | Rate                            | Number (thousand)         | Percent | Rate                         |
|           |                            | Mean (95% UI)                   | Mean    | Mean (95% UI)                   | Mean (95% UI)             | Mean    | Mean (95% UI)                |
| Barbados  | Non-communicable diseases  | 28707.32 (25032.58 to 32720.31) | 0.62    | 18287.13 (15946.25 to 20843.49) | 649.43 (591.52 to 709.86) | 0.73    | 413.70 (376.81 to 452.20)    |
|           | Cardiovascular diseases    | 7474.07 (6757.57 to 8180.23)    | 0.16    | 4761.13 (4304.70 to 5210.97)    | 320.56 (289.32 to 352.49) | 0.36    | 204.20 (184.30 to 224.54)    |
|           | Ischemic heart disease     | 3112.83 (2766.84 to 3462.93)    | 0.07    | 1982.94 (1762.53 to 2205.96)    | 130.98 (117.76 to 145.43) | 0.15    | 83.44 (75.02 to 92.64)       |
|           | Stroke                     | 3526.65 (3195.31 to 3878.88)    | 0.08    | 2246.54 (2035.47 to 2470.93)    | 161.69 (146.41 to 178.60) | 0.18    | 103.00 (93.26 to 113.77)     |
|           | Ischemic stroke            | 1303.16 (1043.46 to 1639.70)    | 0.03    | 830.14 (664.70 to 1044.52)      | 69.76 (56.04 to 86.62)    | 0.08    | 44.44 (35.70 to 55.18)       |
|           | Hypertensive heart disease | 200.13 (147.19 to 282.81)       | 0.00    | 127.49 (93.77 to 180.16)        | 9.81 (6.86 to 14.60)      | 0.01    | 6.25 (4.37 to 9.30)          |
|           | All causes                 | 87.52 (77.65 to 98.19)          | 1.00    | 29578.63 (26245.02 to 33185.01) | 2.78 (2.61 to 2.95)       | 1.00    | 938.92 (880.93 to 995.47)    |
|           | Non-communicable diseases  | 71.99 (63.53 to 81.24)          | 0.82    | 24330.85 (21469.78 to 27457.12) | 2.39 (2.24 to 2.53)       | 0.86    | 806.69 (755.84 to 855.74)    |
|           | Cardiovascular diseases    | 14.91 (13.80 to 16.02)          | 0.17    | 5037.58 (4664.79 to 5414.97)    | 0.84 (0.78 to 0.89)       | 0.30    | 284.05 (265.12 to 302.14)    |
|           | Ischemic heart disease     | 5.13 (4.72 to 5.60)             | 0.06    | 1734.55 (1596.60 to 1893.31)    | 0.31 (0.29 to 0.34)       | 0.11    | 105.91 (97.42 to 114.43)     |
|           | Stroke                     | 5.06 (4.64 to 5.46)             | 0.06    | 1711.46 (1569.14 to 1844.67)    | 0.30 (0.27 to 0.32)       | 0.11    | 100.62 (92.55 to 108.12)     |
|           | Ischemic stroke            | 2.14 (1.95 to 2.32)             | 0.02    | 722.22 (659.78 to 785.45)       | 0.14 (0.13 to 0.15)       | 0.05    | 47.67 (43.67 to 51.49)       |
|           | Hypertensive heart disease | 1.03 (0.88 to 1.26)             | 0.01    | 349.28 (296.51 to 426.37)       | 0.06 (0.05 to 0.08)       | 0.02    | 20.01 (16.41 to 25.52)       |
| Belarus   | All causes                 | 3701.76 (3338.56 to 4086.62)    | 1.00    | 39002.72 (35175.92 to 43057.63) | 120.94 (115.83 to 126.28) | 1.00    | 1274.26 (1220.38 to 1330.52) |
| Belgium   | Non-communicable diseases  | 3057.17 (2754.08 to 3369.82)    | 0.83    | 32211.07 (29017.67 to 35505.32) | 110.52 (105.85 to 115.38) | 0.91    | 1164.46 (1115.30 to 1215.70) |
|           | Cardiovascular diseases    | 1248.29 (1185.56 to 1314.11)    | 0.34    | 13152.26 (12491.32 to 13845.83) | 73.01 (69.57 to 76.52)    | 0.60    | 769.30 (733.06 to 806.22)    |
|           | Ischemic heart disease     | 822.99 (779.51 to 869.59)       | 0.22    | 8671.25 (8213.17 to 9162.21)    | 52.64 (50.14 to 55.29)    | 0.44    | 554.67 (528.24 to 582.58)    |
|           | Stroke                     | 304.84 (282.53 to 326.49)       | 0.08    | 3211.89 (2976.78 to 3439.95)    | 15.86 (14.91 to 16.82)    | 0.13    | 167.11 (157.14 to 177.25)    |
|           | Ischemic stroke            | 190.23 (173.98 to 205.61)       | 0.05    | 2004.33 (1833.13 to 2166.32)    | 10.62 (9.91 to 11.32)     | 0.09    | 111.93 (104.39 to 119.25)    |
|           | Hypertensive heart disease | 18.74 (12.95 to 23.46)          | 0.01    | 197.40 (136.40 to 247.18)       | 1.01 (0.64 to 1.24)       | 0.01    | 10.60 (6.71 to 13.02)        |
|           | All causes                 | 3193.58 (2782.02 to 3667.43)    | 1.00    | 28213.32 (24577.43 to 32399.44) | 108.89 (104.22 to 113.90) | 1.00    | 961.99 (920.71 to 1006.27)   |
|           | Non-communicable diseases  | 2716.26 (2356.29 to 3106.62)    | 0.85    | 23996.44 (20816.37 to 27445.10) | 94.51 (90.54 to 98.91)    | 0.87    | 834.96 (799.87 to 873.83)    |
|           | Cardiovascular diseases    | 456.35 (425.59 to 488.08)       | 0.14    | 4031.55 (3759.83 to 4311.89)    | 32.19 (30.49 to 33.96)    | 0.30    | 284.42 (269.40 to 299.98)    |
|           | Ischemic heart disease     | 197.55 (184.93 to 211.24)       | 0.06    | 1745.25 (1633.72 to 1866.19)    | 15.42 (14.39 to 16.68)    | 0.14    | 136.26 (127.14 to 147.34)    |
|           | Stroke                     | 121.46 (110.86 to 131.55)       | 0.04    | 1073.03 (979.40 to 1162.17)     | 8.23 (7.63 to 8.96)       | 0.08    | 72.70 (67.39 to 79.15)       |
|           | Ischemic stroke            | 62.88 (55.58 to 70.34)          | 0.02    | 555.54 (491.03 to 621.43)       | 4.15 (3.83 to 4.54)       | 0.04    | 36.69 (33.86 to 40.10)       |
|           | Hypertensive heart disease | 7.77 (6.28 to 10.34)            | 0.00    | 68.67 (55.46 to 91.34)          | 0.68 (0.40 to 0.80)       | 0.01    | 5.98 (3.55 to 7.09)          |
| Belize    | All causes                 | 102.33 (92.17 to 113.79)        | 1.00    | 25909.81 (23336.81 to 28811.70) | 1.87 (1.81 to 1.95)       | 1.00    | 474.62 (458.84 to 492.77)    |
| Benin     | Non-communicable diseases  | 63.05 (55.39 to 72.14)          | 0.62    | 15964.70 (14023.03 to 18265.40) | 1.25 (1.22 to 1.29)       | 0.67    | 317.46 (308.57 to 327.87)    |
|           | Cardiovascular diseases    | 10.23 (9.73 to 10.73)           | 0.10    | 2588.88 (2462.70 to 2716.45)    | 0.42 (0.41 to 0.44)       | 0.23    | 107.42 (103.57 to 111.75)    |
|           | Ischemic heart disease     | 3.99 (3.76 to 4.22)             | 0.04    | 1009.74 (951.82 to 1069.44)     | 0.19 (0.18 to 0.20)       | 0.10    | 47.40 (44.90 to 49.88)       |
|           | Stroke                     | 2.83 (2.67 to 3.01)             | 0.03    | 717.67 (675.11 to 762.63)       | 0.12 (0.11 to 0.13)       | 0.06    | 30.36 (28.61 to 32.22)       |
|           | Ischemic stroke            | 0.89 (0.82 to 0.96)             | 0.01    | 225.80 (207.62 to 244.29)       | 0.04 (0.04 to 0.05)       | 0.02    | 11.03 (10.22 to 11.81)       |
|           | Hypertensive heart disease | 0.90 (0.72 to 1.10)             | 0.01    | 228.72 (181.45 to 277.43)       | 0.04 (0.03 to 0.05)       | 0.02    | 10.51 (8.22 to 13.32)        |
|           | All causes                 | 5617.34 (4883.54 to 6506.33)    | 1.00    | 48486.79 (42152.94 to 56160.25) | 80.81 (71.22 to 91.84)    | 1.00    | 697.48 (614.74 to 792.73)    |

**Table 3S National and regional disability-adjusted life years (DALYs) and deaths of non-communicable and cardiovascular diseases for 195 countries according to the GBD 2017 study.**

| Countries | Cause                      | DALYs                        |         |                                 | Deaths                 |         |                              |
|-----------|----------------------------|------------------------------|---------|---------------------------------|------------------------|---------|------------------------------|
|           |                            | Number (thousand)            | Percent | Rate                            | Number (thousand)      | Percent | Rate                         |
|           |                            | Mean (95% UI)                | Mean    | Mean (95% UI)                   | Mean (95% UI)          | Mean    | Mean (95% UI)                |
| Bermuda   | Non-communicable diseases  | 1671.25 (1417.09 to 1930.43) | 0.30    | 14425.64 (12231.81 to 16662.76) | 27.50 (23.75 to 31.60) | 0.34    | 237.34 (204.98 to 272.75)    |
|           | Cardiovascular diseases    | 242.68 (207.78 to 283.80)    | 0.04    | 2094.74 (1793.44 to 2449.69)    | 9.22 (7.89 to 10.77)   | 0.11    | 79.60 (68.12 to 93.00)       |
|           | Ischemic heart disease     | 80.15 (66.12 to 96.20)       | 0.01    | 691.84 (570.75 to 830.40)       | 3.68 (3.08 to 4.34)    | 0.05    | 31.74 (26.58 to 37.50)       |
|           | Stroke                     | 94.78 (78.81 to 113.26)      | 0.02    | 818.09 (680.26 to 977.63)       | 3.66 (3.04 to 4.36)    | 0.05    | 31.58 (26.23 to 37.65)       |
|           | Ischemic stroke            | 30.01 (24.68 to 36.38)       | 0.01    | 259.00 (213.02 to 314.02)       | 1.35 (1.12 to 1.64)    | 0.02    | 11.66 (9.64 to 14.12)        |
|           | Hypertensive heart disease | 11.50 (6.13 to 17.43)        | 0.00    | 99.27 (52.95 to 150.45)         | 0.46 (0.25 to 0.71)    | 0.01    | 3.99 (2.14 to 6.09)          |
|           | All causes                 | 16.81 (14.69 to 19.19)       | 1.00    | 25512.08 (22292.74 to 29124.12) | 0.53 (0.50 to 0.56)    | 1.00    | 798.76 (758.50 to 843.55)    |
|           | Non-communicable diseases  | 14.53 (12.70 to 16.58)       | 0.86    | 22054.79 (19283.05 to 25169.28) | 0.48 (0.45 to 0.51)    | 0.91    | 724.65 (687.76 to 766.81)    |
|           | Cardiovascular diseases    | 3.05 (2.87 to 3.24)          | 0.18    | 4634.10 (4348.86 to 4917.66)    | 0.18 (0.17 to 0.20)    | 0.35    | 280.07 (264.28 to 296.47)    |
|           | Ischemic heart disease     | 1.50 (1.41 to 1.60)          | 0.09    | 2276.81 (2135.97 to 2431.98)    | 0.10 (0.09 to 0.11)    | 0.19    | 149.30 (139.64 to 159.66)    |
|           | Stroke                     | 0.67 (0.62 to 0.73)          | 0.04    | 1019.12 (944.48 to 1101.20)     | 0.04 (0.04 to 0.04)    | 0.08    | 60.12 (55.63 to 65.10)       |
| Bhutan    | Ischemic stroke            | 0.34 (0.30 to 0.37)          | 0.02    | 509.10 (462.00 to 557.23)       | 0.02 (0.02 to 0.02)    | 0.04    | 32.21 (29.62 to 35.37)       |
|           | Hypertensive heart disease | 0.14 (0.11 to 0.17)          | 0.01    | 220.06 (166.30 to 254.40)       | 0.01 (0.01 to 0.01)    | 0.02    | 12.97 (8.47 to 15.10)        |
|           | All causes                 | 232.23 (201.04 to 268.38)    | 1.00    | 24255.56 (20998.55 to 28032.32) | 4.14 (3.60 to 4.70)    | 1.00    | 432.40 (376.41 to 490.43)    |
|           | Non-communicable diseases  | 144.85 (122.07 to 169.61)    | 0.62    | 15129.17 (12749.88 to 17715.76) | 2.94 (2.48 to 3.40)    | 0.71    | 306.56 (259.08 to 354.84)    |
|           | Cardiovascular diseases    | 27.38 (22.52 to 32.22)       | 0.12    | 2860.00 (2352.02 to 3365.57)    | 1.16 (0.96 to 1.36)    | 0.28    | 120.79 (100.74 to 142.50)    |
|           | Ischemic heart disease     | 14.79 (11.60 to 17.94)       | 0.06    | 1544.63 (1211.55 to 1873.81)    | 0.65 (0.52 to 0.78)    | 0.16    | 67.75 (54.76 to 81.36)       |
|           | Stroke                     | 7.52 (5.98 to 9.35)          | 0.03    | 785.19 (624.29 to 976.32)       | 0.33 (0.26 to 0.41)    | 0.08    | 34.59 (27.15 to 43.18)       |
|           | Ischemic stroke            | 2.77 (2.17 to 3.46)          | 0.01    | 289.12 (226.91 to 361.03)       | 0.14 (0.10 to 0.18)    | 0.03    | 14.48 (10.85 to 18.72)       |
|           | Hypertensive heart disease | 0.94 (0.68 to 1.24)          | 0.00    | 97.69 (71.24 to 129.00)         | 0.05 (0.03 to 0.06)    | 0.01    | 5.02 (3.61 to 6.69)          |
|           | All causes                 | 3241.35 (2813.55 to 3695.18) | 1.00    | 28080.68 (24374.51 to 32012.36) | 66.61 (57.82 to 75.67) | 1.00    | 577.02 (500.91 to 655.59)    |
|           | Non-communicable diseases  | 2001.76 (1691.73 to 2315.15) | 0.62    | 17341.81 (14655.88 to 20056.71) | 46.86 (39.66 to 53.86) | 0.70    | 405.93 (343.57 to 466.62)    |
| Bolivia   | Cardiovascular diseases    | 329.04 (275.10 to 382.87)    | 0.10    | 2850.57 (2383.30 to 3316.89)    | 15.27 (12.86 to 17.84) | 0.23    | 132.33 (111.40 to 154.53)    |
|           | Ischemic heart disease     | 154.03 (127.77 to 185.46)    | 0.05    | 1334.36 (1106.94 to 1606.71)    | 8.02 (6.71 to 9.57)    | 0.12    | 69.49 (58.16 to 82.87)       |
|           | Stroke                     | 107.66 (88.04 to 128.00)     | 0.03    | 932.69 (762.68 to 1108.86)      | 4.75 (3.86 to 5.68)    | 0.07    | 41.12 (33.43 to 49.25)       |
|           | Ischemic stroke            | 32.38 (26.44 to 39.06)       | 0.01    | 280.55 (229.10 to 338.41)       | 1.74 (1.40 to 2.15)    | 0.03    | 15.07 (12.14 to 18.62)       |
|           | Hypertensive heart disease | 15.29 (11.20 to 19.64)       | 0.00    | 132.46 (97.03 to 170.12)        | 0.79 (0.57 to 1.02)    | 0.01    | 6.85 (4.95 to 8.84)          |
|           | All causes                 | 1164.81 (1035.70 to 1308.69) | 1.00    | 34266.70 (30468.63 to 38499.35) | 37.01 (35.35 to 38.82) | 1.00    | 1088.79 (1040.04 to 1142.16) |
|           | Non-communicable diseases  | 997.52 (892.03 to 1110.11)   | 0.86    | 29345.32 (26242.05 to 32657.50) | 35.20 (33.61 to 36.92) | 0.95    | 1035.62 (988.61 to 1086.07)  |
|           | Cardiovascular diseases    | 313.15 (294.17 to 332.85)    | 0.27    | 9212.36 (8653.92 to 9791.80)    | 18.11 (17.17 to 19.03) | 0.49    | 532.69 (505.22 to 559.87)    |
|           | Ischemic heart disease     | 143.11 (132.41 to 152.77)    | 0.12    | 4210.19 (3895.20 to 4494.28)    | 8.94 (8.30 to 9.53)    | 0.24    | 263.09 (244.04 to 280.47)    |
|           | Stroke                     | 119.30 (109.67 to 128.50)    | 0.10    | 3509.70 (3226.20 to 3780.17)    | 6.92 (6.36 to 7.43)    | 0.19    | 203.51 (187.21 to 218.51)    |
|           | Ischemic stroke            | 89.09 (79.49 to 96.87)       | 0.08    | 2620.87 (2338.47 to 2849.61)    | 5.37 (4.80 to 5.80)    | 0.14    | 157.84 (141.08 to 170.58)    |
| Botswana  | Hypertensive heart disease | 4.79 (4.09 to 7.29)          | 0.00    | 140.87 (120.45 to 214.48)       | 0.26 (0.21 to 0.46)    | 0.01    | 7.65 (6.29 to 13.59)         |
|           | All causes                 | 779.16 (690.85 to 890.76)    | 1.00    | 34146.00 (30275.78 to 39036.99) | 14.26 (12.98 to 16.00) | 1.00    | 624.84 (568.99 to 701.03)    |
|           | Non-communicable diseases  | 329.74 (281.83 to 380.51)    | 0.42    | 14450.45 (12350.97 to 16675.62) | 6.63 (6.12 to 7.38)    | 0.47    | 290.63 (268.14 to 323.36)    |

**Table 3S National and regional disability-adjusted life years (DALYs) and deaths of non-communicable and cardiovascular diseases for 195 countries according to the GBD 2017 study.**

| Countries    | Cause                      | DALYs                           |                           |                                 | Deaths                       |                        |                              |                         |
|--------------|----------------------------|---------------------------------|---------------------------|---------------------------------|------------------------------|------------------------|------------------------------|-------------------------|
|              |                            | Number (thousand)               | Percent                   | Rate                            | Number (thousand)            | Percent                | Rate                         |                         |
|              |                            | Mean (95% UI)                   | Mean                      | Mean (95% UI)                   | Mean (95% UI)                | Mean                   | Mean (95% UI)                |                         |
| Brazil       | Cardiovascular diseases    | 55.20 (50.24 to 61.24)          | 0.07                      | 2419.18 (2201.80 to 2683.86)    | 2.55 (2.34 to 2.84)          | 0.18                   | 111.66 (102.66 to 124.29)    |                         |
|              | Ischemic heart disease     | 21.71 (19.36 to 24.64)          | 0.03                      | 951.59 (848.48 to 1079.78)      | 1.10 (0.99 to 1.24)          | 0.08                   | 48.13 (43.32 to 54.45)       |                         |
|              | Stroke                     | 19.21 (17.07 to 21.69)          | 0.02                      | 841.92 (748.08 to 950.68)       | 0.91 (0.81 to 1.03)          | 0.06                   | 39.89 (35.42 to 45.35)       |                         |
|              | Ischemic stroke            | 6.41 (5.46 to 7.35)             | 0.01                      | 280.73 (239.18 to 322.23)       | 0.34 (0.28 to 0.40)          | 0.02                   | 14.78 (12.45 to 17.43)       |                         |
|              | Hypertensive heart disease | 4.75 (3.46 to 5.99)             | 0.01                      | 208.35 (151.84 to 262.66)       | 0.24 (0.17 to 0.30)          | 0.02                   | 10.41 (7.66 to 13.19)        |                         |
|              | All causes                 | 60484.38 (54413.00 to 67543.30) | 1.00                      | 28555.59 (25689.21 to 31888.22) | 1349.15 (1341.19 to 1357.26) | 1.00                   | 636.95 (633.19 to 640.78)    |                         |
|              | Non-communicable diseases  | 43033.06 (37888.35 to 48885.42) | 0.71                      | 20316.56 (17887.67 to 23079.55) | 1024.47 (1018.13 to 1031.57) | 0.76                   | 483.67 (480.67 to 487.02)    |                         |
|              | Cardiovascular diseases    | 8477.77 (8219.14 to 8738.29)    | 0.14                      | 4002.48 (3880.38 to 4125.48)    | 388.27 (383.81 to 392.70)    | 0.29                   | 183.31 (181.20 to 185.40)    |                         |
|              | Ischemic heart disease     | 3678.32 (3579.15 to 3768.78)    | 0.06                      | 1736.59 (1689.77 to 1779.30)    | 175.79 (171.32 to 179.41)    | 0.13                   | 82.99 (80.88 to 84.70)       |                         |
|              | Stroke                     | 2594.66 (2510.57 to 2684.85)    | 0.04                      | 1224.98 (1185.28 to 1267.56)    | 122.78 (119.90 to 125.35)    | 0.09                   | 57.97 (56.61 to 59.18)       |                         |
| Brunei       | Ischemic stroke            | 846.62 (794.64 to 900.33)       | 0.01                      | 399.70 (375.16 to 425.06)       | 47.45 (45.94 to 48.71)       | 0.04                   | 22.40 (21.69 to 23.00)       |                         |
|              | Hypertensive heart disease | 433.62 (381.16 to 572.97)       | 0.01                      | 204.72 (179.95 to 270.51)       | 22.98 (19.06 to 30.66)       | 0.02                   | 10.85 (9.00 to 14.47)        |                         |
|              | All causes                 | 96.65 (85.53 to 109.49)         | 1.00                      | 22350.00 (19776.89 to 25317.97) | 1.88 (1.76 to 2.00)          | 1.00                   | 433.58 (406.76 to 463.23)    |                         |
|              | Non-communicable diseases  | 74.35 (65.28 to 84.85)          | 0.77                      | 17192.90 (15095.57 to 19620.57) | 1.54 (1.44 to 1.64)          | 0.82                   | 355.70 (333.67 to 379.67)    |                         |
|              | Cardiovascular diseases    | 13.33 (12.34 to 14.47)          | 0.14                      | 3082.65 (2852.66 to 3346.29)    | 0.51 (0.47 to 0.54)          | 0.27                   | 117.10 (108.70 to 125.53)    |                         |
|              | Ischemic heart disease     | 6.53 (5.97 to 7.12)             | 0.07                      | 1510.17 (1380.34 to 1646.51)    | 0.27 (0.25 to 0.29)          | 0.14                   | 62.19 (57.38 to 67.32)       |                         |
|              | Stroke                     | 3.80 (3.45 to 4.17)             | 0.04                      | 878.56 (797.85 to 964.76)       | 0.14 (0.13 to 0.15)          | 0.07                   | 31.90 (29.26 to 34.68)       |                         |
|              | Ischemic stroke            | 1.28 (1.11 to 1.45)             | 0.01                      | 295.13 (256.58 to 334.55)       | 0.05 (0.04 to 0.05)          | 0.03                   | 11.01 (9.95 to 12.15)        |                         |
|              | Hypertensive heart disease | 0.38 (0.33 to 0.43)             | 0.00                      | 87.45 (77.37 to 99.24)          | 0.02 (0.02 to 0.02)          | 0.01                   | 3.98 (3.54 to 4.57)          |                         |
|              | All causes                 | 2938.97 (2663.26 to 3239.56)    | 1.00                      | 41673.69 (37764.27 to 45935.94) | 107.62 (102.92 to 112.03)    | 1.00                   | 1526.01 (1459.35 to 1588.56) |                         |
| Bulgaria     | Non-communicable diseases  | 2559.30 (2337.74 to 2800.05)    | 0.87                      | 36290.03 (33148.48 to 39703.86) | 102.17 (97.75 to 106.38)     | 0.95                   | 1448.79 (1386.09 to 1508.50) |                         |
|              | Cardiovascular diseases    | 1100.50 (1041.92 to 1154.37)    | 0.38                      | 15604.73 (14774.15 to 16368.58) | 65.62 (62.83 to 68.40)       | 0.61                   | 930.46 (890.95 to 969.84)    |                         |
|              | Ischemic heart disease     | 528.46 (499.78 to 556.34)       | 0.18                      | 7493.34 (7086.70 to 7888.75)    | 33.80 (32.21 to 35.53)       | 0.31                   | 479.21 (456.79 to 503.85)    |                         |
|              | Stroke                     | 364.85 (340.68 to 388.18)       | 0.12                      | 5173.48 (4830.67 to 5504.30)    | 21.47 (20.33 to 22.70)       | 0.20                   | 304.40 (288.31 to 321.86)    |                         |
|              | Ischemic stroke            | 210.05 (193.75 to 226.01)       | 0.07                      | 2978.43 (2747.25 to 3204.81)    | 12.81 (12.08 to 13.63)       | 0.12                   | 181.63 (171.25 to 193.25)    |                         |
|              | Hypertensive heart disease | 89.53 (57.78 to 99.95)          | 0.03                      | 1269.50 (819.25 to 1417.29)     | 5.66 (3.65 to 6.36)          | 0.05                   | 80.31 (51.70 to 90.21)       |                         |
|              | All causes                 | 12915.55 (11192.77 to 15142.03) | 1.00                      | 61147.47 (52991.13 to 71688.56) | 182.84 (162.60 to 208.16)    | 1.00                   | 865.65 (769.83 to 985.53)    |                         |
|              | Non-communicable diseases  | 3660.77 (3138.17 to 4333.19)    | 0.28                      | 17331.56 (14857.38 to 20515.09) | 60.35 (53.22 to 69.13)       | 0.33                   | 285.71 (251.98 to 327.29)    |                         |
|              | Cardiovascular diseases    | 522.36 (464.09 to 582.24)       | 0.04                      | 2473.08 (2197.19 to 2756.55)    | 19.57 (17.46 to 21.73)       | 0.11                   | 92.65 (82.65 to 102.90)      |                         |
|              | Ischemic heart disease     | 215.01 (187.00 to 246.27)       | 0.02                      | 1017.97 (885.35 to 1165.94)     | 9.51 (8.40 to 10.74)         | 0.05                   | 45.02 (39.77 to 50.83)       |                         |
| Burkina Faso | Stroke                     | 157.48 (137.10 to 179.38)       | 0.01                      | 745.58 (649.10 to 849.26)       | 5.72 (5.00 to 6.49)          | 0.03                   | 27.07 (23.67 to 30.73)       |                         |
|              | Ischemic stroke            | 43.86 (35.53 to 53.97)          | 0.00                      | 207.64 (168.19 to 255.52)       | 1.85 (1.49 to 2.30)          | 0.01                   | 8.76 (7.06 to 10.89)         |                         |
|              | Hypertensive heart disease | 30.20 (16.08 to 40.89)          | 0.00                      | 142.97 (76.12 to 193.61)        | 1.24 (0.65 to 1.68)          | 0.01                   | 5.88 (3.10 to 7.93)          |                         |
|              | All causes                 | 5539.97 (4864.14 to 6324.12)    | 1.00                      | 50800.22 (44602.99 to 57990.68) | 81.92 (73.12 to 91.91)       | 1.00                   | 751.16 (670.48 to 842.79)    |                         |
|              | Non-communicable diseases  | 1654.04 (1424.25 to 1884.43)    | 0.30                      | 15167.12 (13060.01 to 17279.78) | 27.17 (23.72 to 30.95)       | 0.33                   | 249.15 (217.48 to 283.78)    |                         |
|              | Burundi                    | Cardiovascular diseases         | 522.36 (464.09 to 582.24) | 0.04                            | 2473.08 (2197.19 to 2756.55) | 19.57 (17.46 to 21.73) | 0.11                         | 92.65 (82.65 to 102.90) |
|              |                            | Ischemic heart disease          | 215.01 (187.00 to 246.27) | 0.02                            | 1017.97 (885.35 to 1165.94)  | 9.51 (8.40 to 10.74)   | 0.05                         | 45.02 (39.77 to 50.83)  |

**Table 3S National and regional disability-adjusted life years (DALYs) and deaths of non-communicable and cardiovascular diseases for 195 countries according to the GBD 2017 study.**

| Countries                | Cause                      | DALYs                           |         |                                  | Deaths                    |         |                              |
|--------------------------|----------------------------|---------------------------------|---------|----------------------------------|---------------------------|---------|------------------------------|
|                          |                            | Number (thousand)               | Percent | Rate                             | Number (thousand)         | Percent | Rate                         |
|                          |                            | Mean (95% UI)                   | Mean    | Mean (95% UI)                    | Mean (95% UI)             | Mean    | Mean (95% UI)                |
| Cambodia                 | Cardiovascular diseases    | 254.15 (219.38 to 294.19)       | 0.05    | 2330.50 (2011.66 to 2697.66)     | 9.01 (7.72 to 10.42)      | 0.11    | 82.63 (70.83 to 95.53)       |
|                          | Ischemic heart disease     | 96.18 (80.36 to 116.75)         | 0.02    | 881.93 (736.91 to 1070.55)       | 3.78 (3.17 to 4.51)       | 0.05    | 34.63 (29.03 to 41.33)       |
|                          | Stroke                     | 88.48 (73.05 to 106.61)         | 0.02    | 811.32 (669.89 to 977.63)        | 3.25 (2.65 to 3.93)       | 0.04    | 29.76 (24.28 to 36.02)       |
|                          | Ischemic stroke            | 20.43 (15.33 to 26.63)          | 0.00    | 187.36 (140.53 to 244.23)        | 0.85 (0.60 to 1.13)       | 0.01    | 7.75 (5.48 to 10.32)         |
|                          | Hypertensive heart disease | 23.94 (10.44 to 43.33)          | 0.00    | 219.54 (95.74 to 397.35)         | 1.03 (0.43 to 1.92)       | 0.01    | 9.45 (3.95 to 17.65)         |
|                          | All causes                 | 5156.12 (4618.26 to 5767.71)    | 1.00    | 31981.13 (28645.03 to 35774.57)  | 101.86 (93.88 to 111.13)  | 1.00    | 631.77 (582.32 to 689.27)    |
|                          | Non-communicable diseases  | 2984.49 (2617.44 to 3383.25)    | 0.58    | 18511.48 (16234.83 to 20984.79)  | 64.60 (59.28 to 71.66)    | 0.63    | 400.67 (367.66 to 444.49)    |
|                          | Cardiovascular diseases    | 598.93 (539.85 to 666.25)       | 0.12    | 3714.93 (3348.47 to 4132.46)     | 24.91 (22.70 to 27.76)    | 0.24    | 154.53 (140.78 to 172.20)    |
|                          | Ischemic heart disease     | 177.69 (155.32 to 203.04)       | 0.03    | 1102.12 (963.36 to 1259.38)      | 7.62 (6.77 to 8.63)       | 0.07    | 47.24 (42.01 to 53.53)       |
|                          | Stroke                     | 320.12 (287.53 to 358.31)       | 0.06    | 1985.57 (1783.41 to 2222.42)     | 13.97 (12.64 to 15.63)    | 0.14    | 86.64 (78.40 to 96.93)       |
| Cameroon                 | Ischemic stroke            | 103.27 (87.94 to 119.93)        | 0.02    | 640.56 (545.43 to 743.86)        | 5.22 (4.39 to 6.06)       | 0.05    | 32.39 (27.25 to 37.58)       |
|                          | Hypertensive heart disease | 32.72 (20.95 to 40.23)          | 0.01    | 202.93 (129.96 to 249.56)        | 1.43 (0.89 to 1.82)       | 0.01    | 8.90 (5.51 to 11.29)         |
|                          | All causes                 | 12454.24 (11013.11 to 14045.92) | 1.00    | 44848.25 (39658.66 to 50579.95)  | 191.22 (169.87 to 212.94) | 1.00    | 688.57 (611.71 to 766.79)    |
|                          | Non-communicable diseases  | 3985.74 (3428.97 to 4615.90)    | 0.32    | 14352.82 (12347.86 to 16622.06)  | 68.46 (58.12 to 79.54)    | 0.36    | 246.52 (209.29 to 286.44)    |
|                          | Cardiovascular diseases    | 624.16 (522.33 to 735.96)       | 0.05    | 2247.63 (1880.94 to 2650.21)     | 22.66 (18.93 to 26.59)    | 0.12    | 81.61 (68.16 to 95.74)       |
|                          | Ischemic heart disease     | 206.52 (158.81 to 254.07)       | 0.02    | 743.68 (571.87 to 914.91)        | 8.88 (6.96 to 10.81)      | 0.05    | 31.97 (25.07 to 38.94)       |
|                          | Stroke                     | 237.25 (191.40 to 291.00)       | 0.02    | 854.35 (689.23 to 1047.91)       | 8.75 (7.13 to 10.66)      | 0.05    | 31.50 (25.67 to 38.39)       |
|                          | Ischemic stroke            | 74.30 (59.29 to 93.99)          | 0.01    | 267.57 (213.52 to 338.46)        | 3.16 (2.50 to 4.04)       | 0.02    | 11.37 (8.99 to 14.55)        |
|                          | Hypertensive heart disease | 32.26 (16.64 to 46.91)          | 0.00    | 116.16 (59.93 to 168.91)         | 1.23 (0.63 to 1.80)       | 0.01    | 4.42 (2.25 to 6.49)          |
|                          | All causes                 | 9341.35 (8152.28 to 10741.64)   | 1.00    | 25960.51 (22655.97 to 29852.06)  | 279.40 (267.87 to 291.87) | 1.00    | 776.49 (744.43 to 811.14)    |
| Canada                   | Non-communicable diseases  | 8022.67 (6984.88 to 9244.50)    | 0.86    | 22295.77 (19411.65 to 25691.35)  | 249.59 (239.24 to 260.69) | 0.89    | 693.64 (664.87 to 724.49)    |
|                          | Cardiovascular diseases    | 1285.87 (1196.97 to 1378.35)    | 0.14    | 3573.56 (3326.48 to 3830.58)     | 80.84 (77.38 to 84.40)    | 0.29    | 224.66 (215.05 to 234.55)    |
|                          | Ischemic heart disease     | 661.10 (625.86 to 700.88)       | 0.07    | 1837.25 (1739.34 to 1947.80)     | 48.38 (46.12 to 50.80)    | 0.17    | 134.45 (128.18 to 141.17)    |
|                          | Stroke                     | 320.49 (287.20 to 355.51)       | 0.03    | 890.68 (798.16 to 987.99)        | 18.06 (16.97 to 19.15)    | 0.06    | 50.19 (47.16 to 53.22)       |
|                          | Ischemic stroke            | 170.57 (143.22 to 197.04)       | 0.02    | 474.03 (398.01 to 547.59)        | 8.57 (7.97 to 9.28)       | 0.03    | 23.82 (22.14 to 25.79)       |
|                          | Hypertensive heart disease | 20.47 (16.24 to 23.50)          | 0.00    | 56.88 (45.12 to 65.30)           | 1.22 (0.76 to 1.39)       | 0.00    | 3.40 (2.12 to 3.86)          |
|                          | All causes                 | 141.20 (124.09 to 159.23)       | 1.00    | 25869.86 (22735.03 to 29172.61)  | 3.00 (2.81 to 3.19)       | 1.00    | 549.89 (515.55 to 583.71)    |
| Cape Verde               | Non-communicable diseases  | 86.25 (74.53 to 98.86)          | 0.61    | 15801.56 (13655.51 to 18112.64)  | 2.05 (1.92 to 2.17)       | 0.68    | 375.71 (352.51 to 397.10)    |
|                          | Cardiovascular diseases    | 16.13 (14.90 to 17.32)          | 0.11    | 2955.87 (2730.28 to 3173.04)     | 0.83 (0.78 to 0.88)       | 0.28    | 152.51 (142.47 to 161.70)    |
|                          | Ischemic heart disease     | 7.55 (6.90 to 8.22)             | 0.05    | 1383.69 (1265.08 to 1506.65)     | 0.46 (0.43 to 0.50)       | 0.15    | 84.62 (78.39 to 91.38)       |
|                          | Stroke                     | 4.55 (4.00 to 5.13)             | 0.03    | 834.42 (733.25 to 940.29)        | 0.22 (0.19 to 0.25)       | 0.07    | 40.02 (34.94 to 44.95)       |
|                          | Ischemic stroke            | 1.52 (1.33 to 1.73)             | 0.01    | 278.93 (242.95 to 316.40)        | 0.08 (0.07 to 0.09)       | 0.03    | 15.14 (13.16 to 17.32)       |
|                          | Hypertensive heart disease | 0.62 (0.54 to 0.72)             | 0.00    | 114.29 (99.61 to 131.65)         | 0.03 (0.02 to 0.04)       | 0.01    | 5.22 (4.53 to 6.64)          |
|                          | All causes                 | 4146.02 (3600.28 to 4840.23)    | 1.00    | 89691.78 (77885.67 to 104709.86) | 63.85 (55.93 to 72.47)    | 1.00    | 1381.33 (1209.93 to 1567.81) |
| Central African Republic | Non-communicable diseases  | 1001.65 (849.44 to 1152.50)     | 0.24    | 21668.98 (18376.07 to 24932.34)  | 18.04 (15.20 to 20.91)    | 0.28    | 390.31 (328.86 to 452.28)    |
|                          | Cardiovascular diseases    | 212.28 (174.51 to 247.47)       | 0.05    | 4592.20 (3775.12 to 5353.60)     | 7.28 (5.92 to 8.42)       | 0.11    | 157.45 (128.09 to 182.07)    |



**Table 3S National and regional disability-adjusted life years (DALYs) and deaths of non-communicable and cardiovascular diseases for 195 countries according to the GBD 2017 study.**

| Countries | Cause                      | DALYs                              |         |                                 | Deaths                          |         |                            |
|-----------|----------------------------|------------------------------------|---------|---------------------------------|---------------------------------|---------|----------------------------|
|           |                            | Number (thousand)                  | Percent | Rate                            | Number (thousand)               | Percent | Rate                       |
|           |                            | Mean (95% UI)                      | Mean    | Mean (95% UI)                   | Mean (95% UI)                   | Mean    | Mean (95% UI)              |
| Chad      | Ischemic heart disease     | 83.48 (66.90 to 101.46)            | 0.02    | 1806.02 (1447.30 to 2195.00)    | 3.10 (2.51 to 3.68)             | 0.05    | 67.11 (54.38 to 79.64)     |
|           | Stroke                     | 74.71 (60.45 to 90.77)             | 0.02    | 1616.27 (1307.64 to 1963.68)    | 2.60 (2.08 to 3.16)             | 0.04    | 56.18 (44.92 to 68.44)     |
|           | Ischemic stroke            | 17.31 (13.15 to 21.92)             | 0.00    | 374.40 (284.53 to 474.10)       | 0.69 (0.51 to 0.89)             | 0.01    | 15.01 (11.07 to 19.21)     |
|           | Hypertensive heart disease | 17.67 (8.64 to 26.05)              | 0.00    | 382.22 (186.86 to 563.65)       | 0.69 (0.34 to 1.02)             | 0.01    | 15.00 (7.35 to 22.05)      |
|           | All causes                 | 10881.72 (9579.65 to 12386.54)     | 1.00    | 71486.42 (62932.58 to 81372.18) | 146.65 (130.96 to 164.49)       | 1.00    | 963.42 (860.31 to 1080.60) |
|           | Non-communicable diseases  | 2270.79 (1956.28 to 2604.75)       | 0.21    | 14917.71 (12851.60 to 17111.62) | 36.88 (32.69 to 41.47)          | 0.25    | 242.30 (214.73 to 272.46)  |
|           | Cardiovascular diseases    | 366.21 (322.18 to 415.38)          | 0.03    | 2405.80 (2116.55 to 2728.79)    | 13.09 (11.49 to 14.84)          | 0.09    | 86.02 (75.49 to 97.49)     |
|           | Ischemic heart disease     | 122.42 (100.85 to 146.93)          | 0.01    | 804.25 (662.50 to 965.24)       | 5.44 (4.54 to 6.49)             | 0.04    | 35.76 (29.79 to 42.62)     |
|           | Stroke                     | 139.91 (118.12 to 165.93)          | 0.01    | 919.09 (776.00 to 1090.08)      | 5.08 (4.28 to 6.02)             | 0.03    | 33.38 (28.12 to 39.58)     |
| Chile     | Ischemic stroke            | 44.78 (36.46 to 54.90)             | 0.00    | 294.19 (239.52 to 360.66)       | 1.94 (1.57 to 2.40)             | 0.01    | 12.76 (10.31 to 15.74)     |
|           | Hypertensive heart disease | 14.83 (8.09 to 21.69)              | 0.00    | 97.41 (53.18 to 142.52)         | 0.58 (0.32 to 0.85)             | 0.00    | 3.84 (2.07 to 5.61)        |
|           | All causes                 | 4407.72 (3829.53 to 5053.27)       | 1.00    | 24599.10 (21372.24 to 28201.83) | 112.32 (102.86 to 122.69)       | 1.00    | 626.83 (574.07 to 684.73)  |
|           | Non-communicable diseases  | 3591.61 (3101.15 to 4151.74)       | 0.81    | 20044.45 (17307.25 to 23170.47) | 96.32 (88.11 to 105.05)         | 0.86    | 537.54 (491.72 to 586.26)  |
|           | Cardiovascular diseases    | 546.57 (496.42 to 600.21)          | 0.12    | 3050.38 (2770.46 to 3349.69)    | 29.91 (27.36 to 32.57)          | 0.27    | 166.90 (152.69 to 181.77)  |
|           | Ischemic heart disease     | 210.68 (190.05 to 235.12)          | 0.05    | 1175.80 (1060.66 to 1312.19)    | 12.30 (11.20 to 13.57)          | 0.11    | 68.65 (62.51 to 75.72)     |
|           | Stroke                     | 193.83 (174.99 to 214.18)          | 0.04    | 1081.74 (976.60 to 1195.33)     | 10.21 (9.29 to 11.20)           | 0.09    | 56.99 (51.87 to 62.52)     |
|           | Ischemic stroke            | 71.93 (63.41 to 80.87)             | 0.02    | 401.46 (353.89 to 451.33)       | 4.07 (3.67 to 4.52)             | 0.04    | 22.74 (20.48 to 25.22)     |
|           | Hypertensive heart disease | 37.09 (26.96 to 42.54)             | 0.01    | 207.01 (150.47 to 237.41)       | 2.59 (1.60 to 2.98)             | 0.02    | 14.45 (8.94 to 16.64)      |
| China     | All causes                 | 371485.31 (334364.57 to 413802.76) | 1.00    | 26300.21 (23672.16 to 29296.18) | 10452.10 (10151.79 to 10762.04) | 1.00    | 739.98 (718.72 to 761.93)  |
|           | Non-communicable diseases  | 307002.37 (274553.65 to 344076.99) | 0.83    | 21734.98 (19437.70 to 24359.77) | 9352.91 (9076.55 to 9640.74)    | 0.89    | 662.16 (642.60 to 682.54)  |
|           | Cardiovascular diseases    | 85040.85 (81465.71 to 88952.44)    | 0.23    | 6020.67 (5767.56 to 6297.61)    | 4377.97 (4232.70 to 4517.15)    | 0.42    | 309.95 (299.66 to 319.80)  |
|           | Ischemic heart disease     | 30106.30 (29014.83 to 31230.36)    | 0.08    | 2131.45 (2054.18 to 2211.03)    | 1750.04 (1693.12 to 1811.06)    | 0.17    | 123.90 (119.87 to 128.22)  |
|           | Stroke                     | 44291.29 (41935.45 to 46729.49)    | 0.12    | 3135.71 (2968.92 to 3308.33)    | 2109.77 (2042.15 to 2185.70)    | 0.20    | 149.37 (144.58 to 154.74)  |
|           | Ischemic stroke            | 18686.59 (16947.57 to 20397.40)    | 0.05    | 1322.96 (1199.84 to 1444.08)    | 851.30 (818.92 to 884.16)       | 0.08    | 60.27 (57.98 to 62.60)     |
|           | Hypertensive heart disease | 4853.82 (3261.35 to 5370.19)       | 0.01    | 343.64 (230.90 to 380.20)       | 298.42 (188.96 to 331.21)       | 0.03    | 21.13 (13.38 to 23.45)     |
|           | All causes                 | 10977.81 (9601.53 to 12422.95)     | 1.00    | 21692.63 (18973.05 to 24548.30) | 234.22 (214.78 to 255.10)       | 1.00    | 462.82 (424.42 to 504.09)  |
|           | Non-communicable diseases  | 7596.54 (6481.21 to 8825.90)       | 0.69    | 15011.10 (12807.17 to 17440.38) | 181.87 (167.11 to 198.65)       | 0.78    | 359.38 (330.21 to 392.53)  |
| Colombia  | Cardiovascular diseases    | 1299.53 (1184.18 to 1414.04)       | 0.12    | 2567.94 (2340.00 to 2794.20)    | 68.02 (62.29 to 74.10)          | 0.29    | 134.42 (123.09 to 146.42)  |
|           | Ischemic heart disease     | 666.99 (603.16 to 730.71)          | 0.06    | 1318.00 (1191.87 to 1443.92)    | 39.05 (35.51 to 42.60)          | 0.17    | 77.16 (70.16 to 84.17)     |
|           | Stroke                     | 318.51 (285.61 to 351.18)          | 0.03    | 629.40 (564.38 to 693.96)       | 15.68 (14.03 to 17.40)          | 0.07    | 30.98 (27.72 to 34.38)     |
|           | Ischemic stroke            | 92.09 (81.00 to 102.80)            | 0.01    | 181.97 (160.06 to 203.14)       | 5.26 (4.69 to 5.88)             | 0.02    | 10.40 (9.27 to 11.62)      |
|           | Hypertensive heart disease | 81.23 (67.87 to 130.66)            | 0.01    | 160.52 (134.11 to 258.20)       | 4.90 (4.12 to 8.29)             | 0.02    | 9.69 (8.13 to 16.38)       |
|           | All causes                 | 236.24 (207.56 to 270.62)          | 1.00    | 32888.07 (28895.64 to 37673.33) | 4.42 (3.94 to 4.90)             | 1.00    | 615.10 (549.13 to 682.76)  |
|           | Non-communicable diseases  | 119.80 (104.37 to 136.58)          | 0.51    | 16677.13 (14530.05 to 19013.28) | 2.54 (2.24 to 2.87)             | 0.57    | 352.95 (311.43 to 399.40)  |
|           | Cardiovascular diseases    | 23.40 (20.13 to 27.07)             | 0.10    | 3257.54 (2802.65 to 3768.50)    | 0.98 (0.85 to 1.13)             | 0.22    | 136.71 (117.93 to 157.90)  |
|           | Comoros                    |                                    |         |                                 |                                 |         |                            |

**Table 3S National and regional disability-adjusted life years (DALYs) and deaths of non-communicable and cardiovascular diseases for 195 countries according to the GBD 2017 study.**

| Countries     | Cause                      | DALYs                           |         |                                 | Deaths                    |         |                              |
|---------------|----------------------------|---------------------------------|---------|---------------------------------|---------------------------|---------|------------------------------|
|               |                            | Number (thousand)               | Percent | Rate                            | Number (thousand)         | Percent | Rate                         |
|               |                            | Mean (95% UI)                   | Mean    | Mean (95% UI)                   | Mean (95% UI)             | Mean    | Mean (95% UI)                |
| Congo         | Ischemic heart disease     | 10.88 (9.05 to 12.98)           | 0.05    | 1515.31 (1259.52 to 1806.68)    | 0.49 (0.41 to 0.58)       | 0.11    | 67.83 (56.65 to 80.35)       |
|               | Stroke                     | 7.69 (6.48 to 9.12)             | 0.03    | 1071.24 (901.89 to 1269.69)     | 0.33 (0.28 to 0.39)       | 0.07    | 45.67 (38.41 to 54.70)       |
|               | Ischemic stroke            | 2.52 (1.95 to 3.16)             | 0.01    | 350.53 (271.16 to 439.24)       | 0.12 (0.09 to 0.16)       | 0.03    | 17.09 (12.98 to 21.82)       |
|               | Hypertensive heart disease | 1.67 (0.95 to 2.57)             | 0.01    | 232.07 (132.59 to 357.30)       | 0.08 (0.04 to 0.13)       | 0.02    | 11.31 (6.25 to 17.89)        |
|               | All causes                 | 2220.12 (1956.35 to 2511.17)    | 1.00    | 45188.09 (39819.37 to 51111.95) | 37.91 (33.70 to 42.83)    | 1.00    | 771.65 (686.02 to 871.78)    |
|               | Non-communicable diseases  | 854.06 (724.83 to 982.04)       | 0.38    | 17383.32 (14753.12 to 19988.35) | 16.38 (14.10 to 18.86)    | 0.43    | 333.38 (287.03 to 383.89)    |
|               | Cardiovascular diseases    | 167.78 (142.33 to 193.59)       | 0.08    | 3415.03 (2896.88 to 3940.36)    | 6.53 (5.60 to 7.42)       | 0.17    | 132.86 (114.02 to 151.06)    |
| Costa Rica    | Ischemic heart disease     | 71.00 (58.98 to 83.54)          | 0.03    | 1445.03 (1200.55 to 1700.35)    | 2.99 (2.52 to 3.46)       | 0.08    | 60.78 (51.25 to 70.46)       |
|               | Stroke                     | 53.98 (44.98 to 63.79)          | 0.02    | 1098.70 (915.61 to 1298.43)     | 2.09 (1.76 to 2.44)       | 0.06    | 42.58 (35.72 to 49.72)       |
|               | Ischemic stroke            | 16.04 (12.92 to 19.58)          | 0.01    | 326.40 (262.96 to 398.58)       | 0.70 (0.55 to 0.88)       | 0.02    | 14.34 (11.29 to 17.81)       |
|               | Hypertensive heart disease | 14.43 (7.50 to 21.67)           | 0.01    | 293.74 (152.72 to 441.16)       | 0.64 (0.34 to 0.92)       | 0.02    | 13.03 (6.92 to 18.63)        |
|               | All causes                 | 997.37 (883.04 to 1136.90)      | 1.00    | 21431.68 (18974.92 to 24429.93) | 23.55 (22.45 to 24.69)    | 1.00    | 506.07 (482.32 to 530.50)    |
|               | Non-communicable diseases  | 766.74 (669.03 to 879.36)       | 0.77    | 16475.76 (14376.14 to 18895.87) | 19.75 (18.80 to 20.72)    | 0.84    | 424.49 (404.04 to 445.22)    |
|               | Cardiovascular diseases    | 132.40 (123.98 to 141.90)       | 0.13    | 2844.98 (2664.17 to 3049.17)    | 6.85 (6.45 to 7.28)       | 0.29    | 147.24 (138.68 to 156.37)    |
| Cote d'Ivoire | Ischemic heart disease     | 68.57 (63.84 to 74.04)          | 0.07    | 1473.49 (1371.82 to 1590.99)    | 3.86 (3.59 to 4.16)       | 0.16    | 83.03 (77.05 to 89.38)       |
|               | Stroke                     | 28.11 (25.88 to 30.53)          | 0.03    | 603.96 (556.16 to 655.97)       | 1.51 (1.39 to 1.64)       | 0.06    | 32.42 (29.78 to 35.28)       |
|               | Ischemic stroke            | 10.69 (9.67 to 11.76)           | 0.01    | 229.65 (207.70 to 252.75)       | 0.68 (0.61 to 0.75)       | 0.03    | 14.58 (13.15 to 16.07)       |
|               | Hypertensive heart disease | 9.11 (7.63 to 10.56)            | 0.01    | 195.79 (163.99 to 226.88)       | 0.58 (0.43 to 0.67)       | 0.02    | 12.37 (9.35 to 14.37)        |
|               | All causes                 | 12579.14 (11218.42 to 14075.34) | 1.00    | 50386.54 (44936.07 to 56379.67) | 185.07 (165.63 to 204.57) | 1.00    | 741.31 (663.42 to 819.42)    |
|               | Non-communicable diseases  | 3909.50 (3420.84 to 4488.40)    | 0.31    | 15659.76 (13702.41 to 17978.56) | 63.30 (55.35 to 71.35)    | 0.34    | 253.53 (221.71 to 285.78)    |
|               | Cardiovascular diseases    | 729.54 (632.92 to 830.11)       | 0.06    | 2922.22 (2535.20 to 3325.06)    | 25.09 (21.78 to 28.62)    | 0.14    | 100.51 (87.25 to 114.62)     |
| Croatia       | Ischemic heart disease     | 296.88 (251.39 to 346.31)       | 0.02    | 1189.16 (1006.95 to 1387.18)    | 11.77 (10.08 to 13.59)    | 0.06    | 47.13 (40.39 to 54.42)       |
|               | Stroke                     | 264.40 (226.82 to 304.22)       | 0.02    | 1059.07 (908.55 to 1218.57)     | 9.04 (7.68 to 10.44)      | 0.05    | 36.22 (30.77 to 41.82)       |
|               | Ischemic stroke            | 74.20 (61.58 to 88.02)          | 0.01    | 297.22 (246.68 to 352.56)       | 2.90 (2.38 to 3.48)       | 0.02    | 11.61 (9.53 to 13.93)        |
|               | Hypertensive heart disease | 28.12 (14.98 to 43.02)          | 0.00    | 112.63 (60.01 to 172.33)        | 1.00 (0.51 to 1.54)       | 0.01    | 4.01 (2.04 to 6.17)          |
|               | All causes                 | 1440.95 (1286.95 to 1619.81)    | 1.00    | 33702.43 (30100.61 to 37885.93) | 51.21 (48.81 to 53.72)    | 1.00    | 1197.77 (1141.59 to 1256.42) |
|               | Non-communicable diseases  | 1239.02 (1112.18 to 1385.61)    | 0.86    | 28979.61 (26012.94 to 32408.08) | 47.73 (45.50 to 50.12)    | 0.93    | 1116.35 (1064.30 to 1172.17) |
|               | Cardiovascular diseases    | 352.07 (332.74 to 372.93)       | 0.24    | 8234.61 (7782.47 to 8722.43)    | 23.43 (22.26 to 24.64)    | 0.46    | 547.91 (520.66 to 576.24)    |
| Cuba          | Ischemic heart disease     | 177.30 (168.06 to 188.34)       | 0.12    | 4146.88 (3930.78 to 4404.99)    | 13.00 (12.30 to 13.89)    | 0.25    | 304.12 (287.70 to 324.78)    |
|               | Stroke                     | 113.90 (105.73 to 122.18)       | 0.08    | 2663.95 (2473.02 to 2857.67)    | 6.86 (6.42 to 7.37)       | 0.13    | 160.56 (150.21 to 172.42)    |
|               | Ischemic stroke            | 61.95 (55.79 to 68.11)          | 0.04    | 1448.94 (1304.91 to 1593.00)    | 3.76 (3.49 to 4.06)       | 0.07    | 87.83 (81.58 to 94.87)       |
|               | Hypertensive heart disease | 17.64 (12.10 to 19.71)          | 0.01    | 412.52 (282.96 to 461.09)       | 1.35 (0.78 to 1.51)       | 0.03    | 31.58 (18.33 to 35.43)       |
|               | All causes                 | 3170.96 (2809.68 to 3565.83)    | 1.00    | 27872.50 (24696.85 to 31343.37) | 101.44 (93.21 to 110.75)  | 1.00    | 891.69 (819.31 to 973.44)    |
|               | Non-communicable diseases  | 2656.11 (2349.46 to 2997.83)    | 0.84    | 23346.98 (20651.60 to 26350.65) | 86.76 (79.59 to 94.68)    | 0.86    | 762.60 (699.63 to 832.26)    |
|               | Cardiovascular diseases    | 647.56 (589.45 to 704.62)       | 0.20    | 5691.96 (5181.17 to 6193.56)    | 37.60 (34.35 to 41.10)    | 0.37    | 330.49 (301.91 to 361.26)    |



**Table 3S National and regional disability-adjusted life years (DALYs) and deaths of non-communicable and cardiovascular diseases for 195 countries according to the GBD 2017 study.**

| Countries                        | Cause                      | DALYs                           |         |                                 | Deaths                    |         |                             |
|----------------------------------|----------------------------|---------------------------------|---------|---------------------------------|---------------------------|---------|-----------------------------|
|                                  |                            | Number (thousand)               | Percent | Rate                            | Number (thousand)         | Percent | Rate                        |
|                                  |                            | Mean (95% UI)                   | Mean    | Mean (95% UI)                   | Mean (95% UI)             | Mean    | Mean (95% UI)               |
| Cyprus                           | Ischemic heart disease     | 338.91 (307.58 to 373.74)       | 0.11    | 2979.01 (2703.64 to 3285.18)    | 21.24 (19.40 to 23.30)    | 0.21    | 186.74 (170.54 to 204.81)   |
|                                  | Stroke                     | 172.40 (155.55 to 191.57)       | 0.05    | 1515.37 (1367.28 to 1683.85)    | 9.87 (8.91 to 10.95)      | 0.10    | 86.78 (78.33 to 96.21)      |
|                                  | Ischemic stroke            | 89.58 (80.94 to 98.60)          | 0.03    | 787.42 (711.44 to 866.68)       | 5.86 (5.28 to 6.45)       | 0.06    | 51.48 (46.37 to 56.74)      |
|                                  | Hypertensive heart disease | 35.13 (21.07 to 40.52)          | 0.01    | 308.77 (185.22 to 356.17)       | 1.97 (1.05 to 2.29)       | 0.02    | 17.28 (9.21 to 20.10)       |
|                                  | All causes                 | 290.67 (249.83 to 336.76)       | 1.00    | 23020.89 (19786.79 to 26671.48) | 7.74 (7.24 to 8.29)       | 1.00    | 612.83 (573.79 to 656.54)   |
|                                  | Non-communicable diseases  | 248.86 (213.04 to 287.79)       | 0.86    | 19709.61 (16872.44 to 22792.85) | 7.05 (6.60 to 7.55)       | 0.91    | 558.18 (522.38 to 598.04)   |
|                                  | Cardiovascular diseases    | 46.26 (42.15 to 50.55)          | 0.16    | 3663.93 (3338.57 to 4003.73)    | 2.71 (2.51 to 2.96)       | 0.35    | 214.27 (198.55 to 234.29)   |
|                                  | Ischemic heart disease     | 25.46 (23.00 to 28.50)          | 0.09    | 2016.44 (1821.44 to 2256.87)    | 1.51 (1.38 to 1.71)       | 0.20    | 119.57 (109.08 to 135.25)   |
| Czech Republic                   | Stroke                     | 9.97 (8.95 to 11.00)            | 0.03    | 789.54 (708.64 to 871.48)       | 0.59 (0.54 to 0.68)       | 0.08    | 47.06 (42.80 to 53.90)      |
|                                  | Ischemic stroke            | 4.43 (3.85 to 4.97)             | 0.02    | 350.70 (304.96 to 393.99)       | 0.27 (0.24 to 0.32)       | 0.04    | 21.46 (19.27 to 25.07)      |
|                                  | Hypertensive heart disease | 1.26 (0.92 to 1.44)             | 0.00    | 99.50 (73.15 to 114.07)         | 0.11 (0.05 to 0.13)       | 0.01    | 8.74 (4.12 to 10.32)        |
|                                  | All causes                 | 3402.78 (3001.47 to 3881.69)    | 1.00    | 32123.76 (28335.16 to 36644.80) | 110.50 (105.46 to 115.82) | 1.00    | 1043.17 (995.62 to 1093.41) |
|                                  | Non-communicable diseases  | 2820.64 (2514.35 to 3187.48)    | 0.83    | 26628.06 (23736.57 to 30091.16) | 101.13 (96.46 to 105.95)  | 0.92    | 954.72 (910.60 to 1000.19)  |
|                                  | Cardiovascular diseases    | 776.76 (725.75 to 826.23)       | 0.23    | 7332.91 (6851.35 to 7800.01)    | 48.96 (46.60 to 51.48)    | 0.44    | 462.20 (439.93 to 485.97)   |
|                                  | Ischemic heart disease     | 434.38 (408.72 to 461.30)       | 0.13    | 4100.77 (3858.45 to 4354.89)    | 31.72 (30.16 to 33.46)    | 0.29    | 299.50 (284.71 to 315.87)   |
|                                  | Stroke                     | 186.63 (169.23 to 202.27)       | 0.05    | 1761.90 (1597.58 to 1909.51)    | 10.48 (9.83 to 11.12)     | 0.09    | 98.97 (92.79 to 104.96)     |
| Democratic Republic of the Congo | Ischemic stroke            | 126.32 (112.82 to 138.46)       | 0.04    | 1192.52 (1065.03 to 1307.14)    | 7.15 (6.70 to 7.60)       | 0.06    | 67.50 (63.27 to 71.74)      |
|                                  | Hypertensive heart disease | 20.62 (16.98 to 25.19)          | 0.01    | 194.67 (160.32 to 237.77)       | 1.23 (0.97 to 1.54)       | 0.01    | 11.65 (9.13 to 14.51)       |
|                                  | All causes                 | 44299.93 (39192.40 to 50132.34) | 1.00    | 54769.25 (48454.67 to 61980.02) | 642.87 (577.58 to 715.30) | 1.00    | 794.80 (714.08 to 884.34)   |
|                                  | Non-communicable diseases  | 13536.93 (11527.33 to 15569.71) | 0.31    | 16736.09 (14251.57 to 19249.28) | 226.12 (195.51 to 257.21) | 0.35    | 279.55 (241.71 to 318.00)   |
|                                  | Cardiovascular diseases    | 2184.71 (1881.05 to 2483.94)    | 0.05    | 2701.02 (2325.60 to 3070.97)    | 83.26 (72.08 to 94.83)    | 0.13    | 102.94 (89.12 to 117.24)    |
|                                  | Ischemic heart disease     | 872.46 (730.78 to 1030.81)      | 0.02    | 1078.65 (903.49 to 1274.42)     | 36.69 (30.81 to 43.00)    | 0.06    | 45.37 (38.09 to 53.16)      |
|                                  | Stroke                     | 731.23 (607.86 to 861.51)       | 0.02    | 904.04 (751.51 to 1065.10)      | 28.10 (23.51 to 33.30)    | 0.04    | 34.74 (29.07 to 41.16)      |
|                                  | Ischemic stroke            | 197.22 (155.37 to 242.99)       | 0.00    | 243.83 (192.09 to 300.42)       | 8.83 (6.67 to 11.21)      | 0.01    | 10.92 (8.24 to 13.86)       |
| Denmark                          | Hypertensive heart disease | 192.75 (109.70 to 291.49)       | 0.00    | 238.30 (135.62 to 360.38)       | 8.82 (4.98 to 14.03)      | 0.01    | 10.91 (6.16 to 17.34)       |
|                                  | All causes                 | 1611.42 (1408.02 to 1841.96)    | 1.00    | 28111.42 (24563.03 to 32133.14) | 54.22 (51.63 to 56.82)    | 1.00    | 945.80 (900.71 to 991.15)   |
|                                  | Non-communicable diseases  | 1420.73 (1245.58 to 1621.23)    | 0.88    | 24784.68 (21729.26 to 28282.41) | 48.86 (46.53 to 51.18)    | 0.90    | 852.33 (811.73 to 892.91)   |
|                                  | Cardiovascular diseases    | 210.87 (196.30 to 225.50)       | 0.13    | 3678.62 (3424.55 to 3933.81)    | 14.52 (13.82 to 15.34)    | 0.27    | 253.38 (241.02 to 267.64)   |
|                                  | Ischemic heart disease     | 89.24 (83.56 to 95.82)          | 0.06    | 1556.83 (1457.62 to 1671.58)    | 6.92 (6.52 to 7.40)       | 0.13    | 120.71 (113.70 to 129.12)   |
|                                  | Stroke                     | 62.91 (57.79 to 68.17)          | 0.04    | 1097.47 (1008.14 to 1189.29)    | 4.08 (3.82 to 4.39)       | 0.08    | 71.22 (66.64 to 76.65)      |
|                                  | Ischemic stroke            | 33.31 (29.77 to 36.84)          | 0.02    | 581.10 (519.37 to 642.64)       | 2.19 (2.03 to 2.38)       | 0.04    | 38.25 (35.36 to 41.60)      |
|                                  | Hypertensive heart disease | 3.15 (2.64 to 3.86)             | 0.00    | 55.03 (46.07 to 67.28)          | 0.25 (0.16 to 0.28)       | 0.00    | 4.35 (2.83 to 4.95)         |
| Djibouti                         | All causes                 | 374.35 (301.92 to 474.89)       | 1.00    | 33630.96 (27124.18 to 42663.69) | 6.23 (4.80 to 8.17)       | 1.00    | 559.42 (431.02 to 733.84)   |
|                                  | Non-communicable diseases  | 168.48 (134.43 to 208.28)       | 0.45    | 15135.74 (12076.78 to 18711.77) | 3.00 (2.27 to 3.99)       | 0.48    | 269.73 (203.51 to 358.55)   |
|                                  | Cardiovascular diseases    | 30.15 (22.79 to 39.65)          | 0.08    | 2708.32 (2047.86 to 3562.20)    | 1.08 (0.81 to 1.40)       | 0.17    | 97.08 (73.20 to 126.20)     |
|                                  | Ischemic heart disease     | 14.13 (10.29 to 18.86)          | 0.04    | 1269.38 (924.87 to 1694.33)     | 0.54 (0.40 to 0.70)       | 0.09    | 48.45 (35.70 to 63.33)      |

**Table 3S National and regional disability-adjusted life years (DALYs) and deaths of non-communicable and cardiovascular diseases for 195 countries according to the GBD 2017 study.**

| Countries          | Cause                      | DALYs                           |         |                                 | Deaths                    |         |                            |
|--------------------|----------------------------|---------------------------------|---------|---------------------------------|---------------------------|---------|----------------------------|
|                    |                            | Number (thousand)               | Percent | Rate                            | Number (thousand)         | Percent | Rate                       |
|                    |                            | Mean (95% UI)                   | Mean    | Mean (95% UI)                   | Mean (95% UI)             | Mean    | Mean (95% UI)              |
| Dominica           | Stroke                     | 9.48 (7.05 to 12.60)            | 0.03    | 852.12 (633.02 to 1132.29)      | 0.35 (0.26 to 0.46)       | 0.06    | 31.47 (23.05 to 41.57)     |
|                    | Ischemic stroke            | 2.68 (1.94 to 3.64)             | 0.01    | 240.33 (174.73 to 326.93)       | 0.11 (0.08 to 0.15)       | 0.02    | 9.83 (6.80 to 13.87)       |
|                    | Hypertensive heart disease | 2.01 (1.06 to 2.97)             | 0.01    | 180.66 (95.51 to 267.07)        | 0.08 (0.04 to 0.12)       | 0.01    | 7.53 (3.90 to 11.01)       |
|                    | All causes                 | 23.36 (21.09 to 25.75)          | 1.00    | 33886.40 (30600.86 to 37350.31) | 0.69 (0.65 to 0.72)       | 1.00    | 997.89 (947.89 to 1049.07) |
|                    | Non-communicable diseases  | 17.79 (15.94 to 19.74)          | 0.76    | 25811.04 (23128.81 to 28635.25) | 0.58 (0.55 to 0.62)       | 0.85    | 848.45 (804.67 to 893.55)  |
|                    | Cardiovascular diseases    | 3.96 (3.74 to 4.20)             | 0.17    | 5751.53 (5428.11 to 6096.75)    | 0.22 (0.21 to 0.24)       | 0.32    | 323.73 (306.05 to 342.39)  |
|                    | Ischemic heart disease     | 1.25 (1.16 to 1.34)             | 0.05    | 1812.16 (1685.91 to 1946.21)    | 0.08 (0.07 to 0.08)       | 0.11    | 112.13 (104.30 to 120.67)  |
|                    | Stroke                     | 1.02 (0.95 to 1.10)             | 0.04    | 1479.40 (1375.39 to 1600.63)    | 0.06 (0.05 to 0.06)       | 0.09    | 85.56 (79.25 to 92.87)     |
| Dominican Republic | Ischemic stroke            | 0.42 (0.39 to 0.46)             | 0.02    | 613.68 (562.93 to 670.07)       | 0.03 (0.03 to 0.03)       | 0.04    | 40.19 (36.64 to 44.08)     |
|                    | Hypertensive heart disease | 0.56 (0.47 to 0.67)             | 0.02    | 818.63 (678.88 to 978.60)       | 0.03 (0.03 to 0.04)       | 0.05    | 48.64 (39.90 to 60.68)     |
|                    | All causes                 | 3108.13 (2760.34 to 3493.91)    | 1.00    | 29737.85 (26410.27 to 33428.91) | 67.05 (60.45 to 73.48)    | 1.00    | 641.54 (578.34 to 703.01)  |
|                    | Non-communicable diseases  | 1906.11 (1659.81 to 2174.45)    | 0.61    | 18237.22 (15880.67 to 20804.64) | 48.21 (43.03 to 53.09)    | 0.72    | 461.30 (411.74 to 507.96)  |
|                    | Cardiovascular diseases    | 504.83 (447.19 to 564.84)       | 0.16    | 4830.14 (4278.61 to 5404.26)    | 23.98 (21.27 to 26.72)    | 0.36    | 229.46 (203.50 to 255.61)  |
|                    | Ischemic heart disease     | 271.71 (236.11 to 309.50)       | 0.09    | 2599.65 (2259.05 to 2961.26)    | 13.62 (12.03 to 15.28)    | 0.20    | 130.28 (115.10 to 146.24)  |
|                    | Stroke                     | 148.86 (131.00 to 168.88)       | 0.05    | 1424.23 (1253.37 to 1615.83)    | 7.04 (6.20 to 7.92)       | 0.10    | 67.33 (59.35 to 75.79)     |
|                    | Ischemic stroke            | 48.65 (43.12 to 54.79)          | 0.02    | 465.49 (412.52 to 524.20)       | 2.71 (2.38 to 3.05)       | 0.04    | 25.97 (22.78 to 29.18)     |
| Ecuador            | Hypertensive heart disease | 27.34 (23.50 to 31.93)          | 0.01    | 261.61 (224.81 to 305.47)       | 1.43 (1.20 to 1.67)       | 0.02    | 13.71 (11.51 to 15.93)     |
|                    | All causes                 | 4035.79 (3577.03 to 4574.45)    | 1.00    | 24186.41 (21437.05 to 27414.60) | 87.37 (81.32 to 94.47)    | 1.00    | 523.60 (487.34 to 566.13)  |
|                    | Non-communicable diseases  | 2721.35 (2364.03 to 3155.89)    | 0.67    | 16308.98 (14167.56 to 18913.16) | 64.65 (60.06 to 69.89)    | 0.74    | 387.47 (359.92 to 418.87)  |
|                    | Cardiovascular diseases    | 405.98 (372.25 to 440.78)       | 0.10    | 2433.04 (2230.89 to 2641.61)    | 19.68 (18.19 to 21.25)    | 0.23    | 117.94 (109.01 to 127.34)  |
|                    | Ischemic heart disease     | 172.14 (156.78 to 189.71)       | 0.04    | 1031.66 (939.60 to 1136.92)     | 9.28 (8.47 to 10.12)      | 0.11    | 55.60 (50.77 to 60.64)     |
|                    | Stroke                     | 123.38 (112.47 to 134.57)       | 0.03    | 739.39 (674.03 to 806.47)       | 5.62 (5.11 to 6.14)       | 0.06    | 33.67 (30.62 to 36.82)     |
|                    | Ischemic stroke            | 42.53 (38.44 to 46.82)          | 0.01    | 254.91 (230.39 to 280.60)       | 2.37 (2.14 to 2.60)       | 0.03    | 14.19 (12.83 to 15.56)     |
|                    | Hypertensive heart disease | 41.74 (31.97 to 48.53)          | 0.01    | 250.16 (191.59 to 290.84)       | 2.49 (1.86 to 2.99)       | 0.03    | 14.94 (11.17 to 17.95)     |
| Egypt              | All causes                 | 27099.34 (24119.16 to 30465.03) | 1.00    | 28086.87 (24998.10 to 31575.21) | 499.50 (459.01 to 543.94) | 1.00    | 517.71 (475.73 to 563.76)  |
|                    | Non-communicable diseases  | 19790.06 (17410.23 to 22414.07) | 0.73    | 20511.24 (18044.68 to 23230.86) | 405.51 (373.09 to 440.99) | 0.81    | 420.29 (386.68 to 457.06)  |
|                    | Cardiovascular diseases    | 6052.48 (5494.04 to 6684.01)    | 0.22    | 6273.04 (5694.25 to 6927.58)    | 232.67 (211.82 to 256.63) | 0.47    | 241.15 (219.53 to 265.99)  |
|                    | Ischemic heart disease     | 3966.80 (3511.85 to 4457.33)    | 0.15    | 4111.35 (3639.83 to 4619.76)    | 158.82 (141.34 to 176.97) | 0.32    | 164.61 (146.49 to 183.42)  |
|                    | Stroke                     | 1372.70 (1217.13 to 1543.65)    | 0.05    | 1422.73 (1261.48 to 1599.90)    | 50.84 (44.97 to 57.57)    | 0.10    | 52.69 (46.61 to 59.67)     |
|                    | Ischemic stroke            | 782.71 (681.03 to 900.88)       | 0.03    | 811.23 (705.85 to 933.70)       | 31.81 (27.46 to 36.67)    | 0.06    | 32.97 (28.46 to 38.01)     |
|                    | Hypertensive heart disease | 300.11 (139.40 to 411.50)       | 0.01    | 311.05 (144.47 to 426.49)       | 12.88 (5.56 to 17.26)     | 0.03    | 13.35 (5.76 to 17.88)      |
|                    | All causes                 | 1721.16 (1509.50 to 1958.26)    | 1.00    | 28276.20 (24799.03 to 32171.46) | 41.52 (36.53 to 47.06)    | 1.00    | 682.08 (600.15 to 773.13)  |
| El Salvador        | Non-communicable diseases  | 1122.67 (972.01 to 1292.93)     | 0.65    | 18443.96 (15968.75 to 21240.96) | 30.25 (26.48 to 34.56)    | 0.73    | 497.01 (435.04 to 567.75)  |
|                    | Cardiovascular diseases    | 188.36 (164.07 to 216.84)       | 0.11    | 3094.49 (2695.47 to 3562.42)    | 9.84 (8.57 to 11.31)      | 0.24    | 161.74 (140.82 to 185.86)  |
|                    | Ischemic heart disease     | 111.63 (96.08 to 129.82)        | 0.06    | 1834.00 (1578.43 to 2132.78)    | 6.44 (5.60 to 7.38)       | 0.16    | 105.74 (91.92 to 121.19)   |
|                    | Stroke                     | 39.52 (34.10 to 45.25)          | 0.02    | 649.19 (560.14 to 743.45)       | 2.02 (1.75 to 2.34)       | 0.05    | 33.17 (28.71 to 38.43)     |

**Table 3S National and regional disability-adjusted life years (DALYs) and deaths of non-communicable and cardiovascular diseases for 195 countries according to the GBD 2017 study.**

| Countries                      | Cause                      | DALYs                           |         |                                 | Deaths                    |         |                              |
|--------------------------------|----------------------------|---------------------------------|---------|---------------------------------|---------------------------|---------|------------------------------|
|                                |                            | Number (thousand)               | Percent | Rate                            | Number (thousand)         | Percent | Rate                         |
|                                |                            | Mean (95% UI)                   | Mean    | Mean (95% UI)                   | Mean (95% UI)             | Mean    | Mean (95% UI)                |
| Equatorial Guinea              | Ischemic stroke            | 14.20 (12.35 to 16.21)          | 0.01    | 233.30 (202.82 to 266.31)       | 0.90 (0.77 to 1.04)       | 0.02    | 14.80 (12.72 to 17.04)       |
|                                | Hypertensive heart disease | 10.26 (8.62 to 12.63)           | 0.01    | 168.51 (141.61 to 207.55)       | 0.52 (0.42 to 0.76)       | 0.01    | 8.55 (6.91 to 12.49)         |
|                                | All causes                 | 503.45 (408.89 to 628.74)       | 1.00    | 37430.12 (30399.98 to 46745.43) | 7.26 (5.56 to 9.45)       | 1.00    | 539.88 (413.45 to 702.25)    |
|                                | Non-communicable diseases  | 166.07 (129.84 to 204.99)       | 0.33    | 12346.58 (9653.35 to 15240.88)  | 2.40 (1.69 to 3.26)       | 0.33    | 178.64 (125.94 to 242.20)    |
|                                | Cardiovascular diseases    | 17.89 (12.88 to 23.73)          | 0.04    | 1330.17 (957.48 to 1764.13)     | 0.71 (0.51 to 0.95)       | 0.10    | 52.69 (37.57 to 70.71)       |
|                                | Ischemic heart disease     | 5.86 (4.08 to 8.22)             | 0.01    | 435.71 (303.35 to 611.36)       | 0.28 (0.20 to 0.38)       | 0.04    | 20.55 (14.55 to 28.10)       |
|                                | Stroke                     | 5.44 (3.95 to 7.26)             | 0.01    | 404.37 (293.57 to 539.66)       | 0.21 (0.15 to 0.29)       | 0.03    | 15.96 (11.07 to 21.91)       |
| Eritrea                        | Ischemic stroke            | 1.73 (1.32 to 2.24)             | 0.00    | 128.90 (97.88 to 166.47)        | 0.07 (0.05 to 0.10)       | 0.01    | 5.48 (3.78 to 7.60)          |
|                                | Hypertensive heart disease | 1.87 (1.03 to 2.88)             | 0.00    | 138.80 (76.27 to 214.11)        | 0.09 (0.05 to 0.13)       | 0.01    | 6.59 (3.64 to 9.88)          |
|                                | All causes                 | 2684.56 (2294.87 to 3100.14)    | 1.00    | 45816.84 (39166.11 to 52909.41) | 41.76 (36.16 to 47.91)    | 1.00    | 712.75 (617.20 to 817.75)    |
|                                | Non-communicable diseases  | 959.23 (813.16 to 1109.49)      | 0.36    | 16371.01 (13878.09 to 18935.46) | 16.50 (13.92 to 19.17)    | 0.40    | 281.65 (237.52 to 327.22)    |
|                                | Cardiovascular diseases    | 156.80 (132.03 to 181.64)       | 0.06    | 2676.00 (2253.38 to 3100.09)    | 5.21 (4.41 to 6.01)       | 0.12    | 88.93 (75.20 to 102.50)      |
|                                | Ischemic heart disease     | 56.28 (45.50 to 67.63)          | 0.02    | 960.46 (776.46 to 1154.19)      | 2.01 (1.65 to 2.38)       | 0.05    | 34.31 (28.18 to 40.55)       |
|                                | Stroke                     | 57.02 (47.35 to 67.54)          | 0.02    | 973.13 (808.04 to 1152.68)      | 1.99 (1.63 to 2.35)       | 0.05    | 33.95 (27.85 to 40.07)       |
| Estonia                        | Ischemic stroke            | 14.01 (10.45 to 18.32)          | 0.01    | 239.04 (178.34 to 312.59)       | 0.58 (0.42 to 0.76)       | 0.01    | 9.89 (7.12 to 13.02)         |
|                                | Hypertensive heart disease | 13.53 (7.18 to 19.93)           | 0.01    | 230.90 (122.53 to 340.09)       | 0.55 (0.30 to 0.83)       | 0.01    | 9.42 (5.10 to 14.10)         |
|                                | All causes                 | 449.49 (391.57 to 508.92)       | 1.00    | 34193.70 (29787.51 to 38714.44) | 15.30 (13.85 to 16.78)    | 1.00    | 1163.63 (1053.90 to 1276.46) |
|                                | Non-communicable diseases  | 378.41 (329.47 to 427.80)       | 0.84    | 28786.57 (25063.55 to 32543.38) | 14.24 (12.90 to 15.60)    | 0.93    | 1083.45 (981.69 to 1187.01)  |
|                                | Cardiovascular diseases    | 114.61 (102.99 to 126.43)       | 0.26    | 8718.32 (7834.32 to 9617.79)    | 7.74 (6.97 to 8.53)       | 0.51    | 589.08 (529.85 to 649.13)    |
|                                | Ischemic heart disease     | 55.68 (47.68 to 72.82)          | 0.12    | 4236.01 (3627.01 to 5539.51)    | 4.35 (3.75 to 5.72)       | 0.28    | 330.97 (284.95 to 435.06)    |
|                                | Stroke                     | 22.70 (19.46 to 27.82)          | 0.05    | 1726.83 (1480.35 to 2116.51)    | 1.12 (0.96 to 1.49)       | 0.07    | 85.53 (73.09 to 113.47)      |
| Ethiopia                       | Ischemic stroke            | 16.77 (14.33 to 20.11)          | 0.04    | 1275.87 (1090.13 to 1529.64)    | 0.85 (0.73 to 1.11)       | 0.06    | 64.59 (55.36 to 84.20)       |
|                                | Hypertensive heart disease | 20.98 (4.98 to 26.02)           | 0.05    | 1595.99 (378.53 to 1979.14)     | 1.60 (0.28 to 2.02)       | 0.10    | 122.04 (21.06 to 153.67)     |
|                                | All causes                 | 37827.92 (34540.71 to 41082.48) | 1.00    | 36767.57 (33572.50 to 39930.89) | 536.99 (511.09 to 566.67) | 1.00    | 521.94 (496.77 to 550.79)    |
|                                | Non-communicable diseases  | 12376.23 (10770.38 to 14204.30) | 0.33    | 12029.31 (10468.47 to 13806.14) | 196.67 (182.16 to 209.05) | 0.37    | 191.16 (177.05 to 203.19)    |
|                                | Cardiovascular diseases    | 1552.45 (1411.81 to 1704.33)    | 0.04    | 1508.93 (1372.24 to 1656.56)    | 58.72 (53.18 to 65.23)    | 0.11    | 57.07 (51.69 to 63.40)       |
|                                | Ischemic heart disease     | 613.13 (530.06 to 699.56)       | 0.02    | 595.95 (515.20 to 679.95)       | 26.17 (22.17 to 30.37)    | 0.05    | 25.43 (21.55 to 29.51)       |
|                                | Stroke                     | 496.02 (431.63 to 563.76)       | 0.01    | 482.11 (419.53 to 547.96)       | 19.84 (16.84 to 23.14)    | 0.04    | 19.28 (16.37 to 22.49)       |
| Federated States of Micronesia | Ischemic stroke            | 135.73 (101.24 to 173.64)       | 0.00    | 131.92 (98.41 to 168.77)        | 6.01 (4.11 to 8.04)       | 0.01    | 5.84 (3.99 to 7.81)          |
|                                | Hypertensive heart disease | 124.62 (69.09 to 191.93)        | 0.00    | 121.13 (67.15 to 186.55)        | 5.89 (3.16 to 9.28)       | 0.01    | 5.73 (3.07 to 9.02)          |
|                                | All causes                 | 36.17 (32.09 to 41.01)          | 1.00    | 34801.23 (30881.06 to 39459.28) | 0.75 (0.67 to 0.83)       | 1.00    | 719.11 (642.66 to 799.78)    |
|                                | Non-communicable diseases  | 25.11 (21.11 to 29.07)          | 0.69    | 24165.37 (20312.42 to 27976.43) | 0.58 (0.49 to 0.65)       | 0.77    | 555.55 (476.01 to 629.13)    |
|                                | Cardiovascular diseases    | 7.63 (6.13 to 8.90)             | 0.21    | 7338.15 (5900.36 to 8568.31)    | 0.27 (0.23 to 0.30)       | 0.35    | 255.24 (218.33 to 290.10)    |
|                                | Ischemic heart disease     | 3.57 (2.86 to 4.22)             | 0.10    | 3431.72 (2750.06 to 4061.29)    | 0.13 (0.11 to 0.15)       | 0.18    | 127.04 (108.69 to 146.17)    |
|                                | Stroke                     | 2.57 (2.06 to 3.03)             | 0.07    | 2474.87 (1979.01 to 2920.12)    | 0.09 (0.07 to 0.10)       | 0.12    | 85.44 (71.54 to 98.67)       |
|                                | Ischemic stroke            | 0.62 (0.51 to 0.73)             | 0.02    | 595.54 (493.52 to 702.37)       | 0.02 (0.02 to 0.03)       | 0.03    | 23.51 (19.64 to 27.66)       |

**Table 3S National and regional disability-adjusted life years (DALYs) and deaths of non-communicable and cardiovascular diseases for 195 countries according to the GBD 2017 study.**

| Countries | Cause                      | DALYs                           |         |                                 | Deaths                    |         |                              |
|-----------|----------------------------|---------------------------------|---------|---------------------------------|---------------------------|---------|------------------------------|
|           |                            | Number (thousand)               | Percent | Rate                            | Number (thousand)         | Percent | Rate                         |
|           |                            | Mean (95% UI)                   | Mean    | Mean (95% UI)                   | Mean (95% UI)             | Mean    | Mean (95% UI)                |
| Fiji      | Hypertensive heart disease | 0.37 (0.25 to 0.49)             | 0.01    | 351.85 (238.01 to 467.83)       | 0.01 (0.01 to 0.02)       | 0.02    | 13.09 (9.02 to 16.82)        |
|           | All causes                 | 326.30 (290.09 to 365.63)       | 1.00    | 35978.20 (31985.21 to 40314.74) | 7.25 (6.51 to 8.01)       | 1.00    | 799.67 (717.76 to 883.70)    |
|           | Non-communicable diseases  | 246.91 (219.82 to 278.41)       | 0.76    | 27224.40 (24237.88 to 30697.33) | 6.09 (5.44 to 6.75)       | 0.84    | 671.82 (599.91 to 744.40)    |
|           | Cardiovascular diseases    | 70.53 (63.13 to 79.08)          | 0.22    | 7776.84 (6961.15 to 8719.51)    | 2.55 (2.28 to 2.85)       | 0.35    | 281.52 (251.24 to 314.20)    |
|           | Ischemic heart disease     | 37.69 (33.19 to 42.67)          | 0.12    | 4155.29 (3659.77 to 4704.54)    | 1.44 (1.27 to 1.62)       | 0.20    | 158.51 (140.31 to 178.47)    |
|           | Stroke                     | 14.79 (13.21 to 16.63)          | 0.05    | 1631.11 (1456.32 to 1833.46)    | 0.54 (0.47 to 0.60)       | 0.07    | 59.00 (52.26 to 66.37)       |
|           | Ischemic stroke            | 4.90 (4.31 to 5.54)             | 0.02    | 540.47 (475.26 to 610.53)       | 0.18 (0.16 to 0.21)       | 0.03    | 20.33 (17.90 to 23.05)       |
| Finland   | Hypertensive heart disease | 4.68 (3.99 to 5.56)             | 0.01    | 515.92 (439.92 to 613.45)       | 0.19 (0.16 to 0.22)       | 0.03    | 20.46 (17.45 to 24.42)       |
|           | All causes                 | 1605.24 (1406.27 to 1834.21)    | 1.00    | 29091.06 (25485.20 to 33240.57) | 55.07 (52.68 to 57.86)    | 1.00    | 998.03 (954.61 to 1048.59)   |
|           | Non-communicable diseases  | 1384.09 (1213.74 to 1582.42)    | 0.86    | 25083.31 (21996.03 to 28677.62) | 50.96 (48.78 to 53.51)    | 0.93    | 923.49 (884.06 to 969.68)    |
|           | Cardiovascular diseases    | 304.52 (286.65 to 323.84)       | 0.19    | 5518.72 (5194.81 to 5868.75)    | 21.36 (20.40 to 22.46)    | 0.39    | 387.09 (369.63 to 407.12)    |
|           | Ischemic heart disease     | 157.59 (147.57 to 172.37)       | 0.10    | 2855.90 (2674.34 to 3123.74)    | 12.43 (11.71 to 13.56)    | 0.23    | 225.27 (212.21 to 245.70)    |
|           | Stroke                     | 71.95 (65.51 to 78.75)          | 0.04    | 1303.96 (1187.12 to 1427.09)    | 4.57 (4.28 to 4.96)       | 0.08    | 82.86 (77.50 to 89.90)       |
|           | Ischemic stroke            | 46.39 (41.60 to 51.24)          | 0.03    | 840.64 (753.90 to 928.56)       | 3.19 (2.98 to 3.44)       | 0.06    | 57.73 (53.92 to 62.30)       |
| France    | Hypertensive heart disease | 12.53 (6.25 to 14.42)           | 0.01    | 227.11 (113.18 to 261.34)       | 1.02 (0.39 to 1.20)       | 0.02    | 18.42 (7.03 to 21.69)        |
|           | All causes                 | 16675.43 (14570.51 to 19111.11) | 1.00    | 25376.30 (22173.08 to 29082.87) | 579.16 (556.35 to 604.72) | 1.00    | 881.36 (846.64 to 920.24)    |
|           | Non-communicable diseases  | 14228.80 (12369.72 to 16328.02) | 0.85    | 21653.08 (18823.97 to 24847.63) | 509.32 (488.75 to 532.40) | 0.88    | 775.07 (743.77 to 810.20)    |
|           | Cardiovascular diseases    | 2148.33 (1982.65 to 2321.60)    | 0.13    | 3269.29 (3017.16 to 3532.96)    | 155.68 (148.49 to 163.99) | 0.27    | 236.91 (225.96 to 249.56)    |
|           | Ischemic heart disease     | 813.22 (760.26 to 873.36)       | 0.05    | 1237.54 (1156.94 to 1329.06)    | 68.36 (64.26 to 74.26)    | 0.12    | 104.03 (97.78 to 113.00)     |
|           | Stroke                     | 565.98 (516.66 to 620.96)       | 0.03    | 861.30 (786.23 to 944.97)       | 38.76 (36.04 to 42.15)    | 0.07    | 58.99 (54.84 to 64.15)       |
|           | Ischemic stroke            | 308.53 (271.60 to 346.53)       | 0.02    | 469.51 (413.31 to 527.34)       | 21.27 (19.63 to 23.32)    | 0.04    | 32.36 (29.88 to 35.48)       |
| Gabon     | Hypertensive heart disease | 58.24 (42.77 to 67.18)          | 0.00    | 88.63 (65.09 to 102.23)         | 5.77 (2.72 to 6.70)       | 0.01    | 8.78 (4.13 to 10.20)         |
|           | All causes                 | 625.61 (553.38 to 701.70)       | 1.00    | 36741.67 (32499.56 to 41210.66) | 11.14 (10.09 to 12.19)    | 1.00    | 653.97 (592.64 to 715.77)    |
|           | Non-communicable diseases  | 293.59 (253.21 to 337.87)       | 0.47    | 17242.52 (14870.75 to 19843.01) | 5.94 (5.27 to 6.61)       | 0.53    | 348.69 (309.79 to 388.11)    |
|           | Cardiovascular diseases    | 51.76 (45.50 to 58.72)          | 0.08    | 3040.02 (2672.33 to 3448.67)    | 2.23 (1.97 to 2.51)       | 0.20    | 130.95 (115.87 to 147.53)    |
|           | Ischemic heart disease     | 22.13 (19.04 to 25.70)          | 0.04    | 1299.98 (1118.00 to 1509.48)    | 1.03 (0.90 to 1.18)       | 0.09    | 60.78 (52.77 to 69.48)       |
|           | Stroke                     | 15.50 (13.38 to 18.02)          | 0.02    | 910.12 (785.73 to 1058.40)      | 0.66 (0.58 to 0.77)       | 0.06    | 38.89 (33.83 to 45.33)       |
|           | Ischemic stroke            | 4.75 (3.91 to 5.64)             | 0.01    | 278.87 (229.79 to 331.46)       | 0.23 (0.19 to 0.28)       | 0.02    | 13.50 (11.13 to 16.30)       |
| Georgia   | Hypertensive heart disease | 4.54 (2.48 to 6.04)             | 0.01    | 266.78 (145.68 to 354.59)       | 0.23 (0.12 to 0.30)       | 0.02    | 13.30 (7.07 to 17.83)        |
|           | All causes                 | 1435.11 (1317.17 to 1569.20)    | 1.00    | 38878.07 (35682.88 to 42510.65) | 50.56 (49.32 to 51.70)    | 1.00    | 1369.80 (1336.19 to 1400.59) |
|           | Non-communicable diseases  | 1204.98 (1107.40 to 1317.27)    | 0.84    | 32643.66 (30000.00 to 35685.57) | 46.82 (45.67 to 47.93)    | 0.93    | 1268.37 (1237.30 to 1298.41) |
|           | Cardiovascular diseases    | 494.71 (478.06 to 511.26)       | 0.35    | 13401.87 (12950.88 to 13850.41) | 29.99 (29.21 to 30.78)    | 0.59    | 812.43 (791.33 to 833.75)    |
|           | Ischemic heart disease     | 239.06 (228.47 to 251.79)       | 0.17    | 6476.20 (6189.25 to 6821.03)    | 15.01 (14.33 to 16.07)    | 0.30    | 406.60 (388.16 to 435.38)    |
|           | Stroke                     | 172.89 (163.34 to 184.19)       | 0.12    | 4683.62 (4425.02 to 4989.69)    | 10.21 (9.72 to 11.05)     | 0.20    | 276.65 (263.19 to 299.43)    |
|           | Ischemic stroke            | 62.18 (57.14 to 67.93)          | 0.04    | 1684.55 (1547.83 to 1840.16)    | 3.78 (3.52 to 4.16)       | 0.07    | 102.48 (95.34 to 112.61)     |

**Table 3S National and regional disability-adjusted life years (DALYs) and deaths of non-communicable and cardiovascular diseases for 195 countries according to the GBD 2017 study.**

| Countries | Cause                      | DALYs                           |         |                                 | Deaths                     |         |                              |
|-----------|----------------------------|---------------------------------|---------|---------------------------------|----------------------------|---------|------------------------------|
|           |                            | Number (thousand)               | Percent | Rate                            | Number (thousand)          | Percent | Rate                         |
|           |                            | Mean (95% UI)                   | Mean    | Mean (95% UI)                   | Mean (95% UI)              | Mean    | Mean (95% UI)                |
| Germany   | Hypertensive heart disease | 38.87 (19.87 to 44.06)          | 0.03    | 1053.02 (538.23 to 1193.62)     | 2.83 (1.10 to 3.29)        | 0.06    | 76.76 (29.83 to 89.04)       |
|           | All causes                 | 25683.27 (22530.57 to 29380.02) | 1.00    | 30834.29 (27049.29 to 35272.46) | 947.31 (870.02 to 1026.31) | 1.00    | 1137.30 (1044.51 to 1232.15) |
| Ghana     | Non-communicable diseases  | 22727.10 (19944.08 to 26050.38) | 0.88    | 27285.23 (23944.05 to 31275.02) | 875.09 (804.22 to 947.61)  | 0.92    | 1050.60 (965.51 to 1137.66)  |
|           | Cardiovascular diseases    | 4838.02 (4457.85 to 5250.18)    | 0.19    | 5808.32 (5351.91 to 6303.15)    | 356.36 (327.97 to 385.36)  | 0.38    | 427.83 (393.75 to 462.65)    |
|           | Ischemic heart disease     | 2378.65 (2169.44 to 2620.31)    | 0.09    | 2855.71 (2604.55 to 3145.84)    | 192.86 (176.28 to 211.62)  | 0.20    | 231.55 (211.64 to 254.07)    |
|           | Stroke                     | 1023.38 (917.52 to 1126.22)     | 0.04    | 1228.63 (1101.54 to 1352.10)    | 65.55 (59.48 to 72.72)     | 0.07    | 78.70 (71.41 to 87.30)       |
|           | Ischemic stroke            | 623.07 (549.44 to 691.33)       | 0.02    | 748.03 (659.64 to 829.98)       | 40.03 (36.19 to 44.49)     | 0.04    | 48.06 (43.45 to 53.41)       |
|           | Hypertensive heart disease | 251.86 (187.09 to 287.18)       | 0.01    | 302.37 (224.61 to 344.78)       | 24.78 (12.96 to 28.84)     | 0.03    | 29.74 (15.55 to 34.62)       |
|           | All causes                 | 12014.16 (10804.46 to 13389.63) | 1.00    | 39775.01 (35770.10 to 44328.74) | 201.64 (185.65 to 219.69)  | 1.00    | 667.56 (614.63 to 727.34)    |
|           | Non-communicable diseases  | 4746.70 (4149.58 to 5426.26)    | 0.40    | 15714.79 (13737.92 to 17964.59) | 88.80 (79.48 to 98.57)     | 0.44    | 294.00 (263.14 to 326.34)    |
|           | Cardiovascular diseases    | 948.20 (836.08 to 1069.40)      | 0.08    | 3139.17 (2768.00 to 3540.45)    | 36.61 (32.49 to 41.08)     | 0.18    | 121.22 (107.56 to 136.00)    |
|           | Ischemic heart disease     | 351.36 (306.89 to 401.95)       | 0.03    | 1163.23 (1016.02 to 1330.72)    | 15.51 (13.64 to 17.60)     | 0.08    | 51.34 (45.15 to 58.27)       |
| Greece    | Stroke                     | 389.88 (337.79 to 447.58)       | 0.03    | 1290.77 (1118.33 to 1481.79)    | 15.15 (13.17 to 17.34)     | 0.08    | 50.15 (43.61 to 57.42)       |
|           | Ischemic stroke            | 146.62 (125.92 to 169.65)       | 0.01    | 485.40 (416.89 to 561.66)       | 6.52 (5.60 to 7.49)        | 0.03    | 21.58 (18.54 to 24.80)       |
|           | Hypertensive heart disease | 33.02 (17.15 to 53.00)          | 0.00    | 109.32 (56.77 to 175.46)        | 1.29 (0.66 to 2.09)        | 0.01    | 4.27 (2.19 to 6.92)          |
|           | All causes                 | 3165.01 (2788.61 to 3581.20)    | 1.00    | 30425.98 (26807.54 to 34426.91) | 120.26 (114.93 to 125.59)  | 1.00    | 1156.07 (1104.88 to 1207.37) |
|           | Non-communicable diseases  | 2802.15 (2468.44 to 3161.22)    | 0.89    | 26937.70 (23729.70 to 30389.62) | 111.58 (106.60 to 116.54)  | 0.93    | 1072.63 (1024.80 to 1120.36) |
|           | Cardiovascular diseases    | 698.11 (657.55 to 737.37)       | 0.22    | 6711.11 (6321.16 to 7088.55)    | 50.90 (48.40 to 53.39)     | 0.42    | 489.27 (465.27 to 513.27)    |
|           | Ischemic heart disease     | 352.65 (333.66 to 371.40)       | 0.11    | 3390.09 (3207.55 to 3570.33)    | 25.73 (24.41 to 27.18)     | 0.21    | 247.30 (234.63 to 261.25)    |
|           | Stroke                     | 214.89 (199.32 to 230.04)       | 0.07    | 2065.83 (1916.11 to 2211.47)    | 16.86 (15.78 to 18.05)     | 0.14    | 162.08 (151.66 to 173.51)    |
|           | Ischemic stroke            | 101.60 (92.18 to 110.59)        | 0.03    | 976.72 (886.13 to 1063.11)      | 8.43 (7.77 to 9.09)        | 0.07    | 81.01 (74.67 to 87.41)       |
|           | Hypertensive heart disease | 21.79 (13.84 to 24.63)          | 0.01    | 209.44 (133.07 to 236.81)       | 1.89 (0.89 to 2.20)        | 0.02    | 18.20 (8.51 to 21.17)        |
| Greenland | All causes                 | 18.58 (16.80 to 20.61)          | 1.00    | 33089.18 (29910.89 to 36695.98) | 0.45 (0.43 to 0.47)        | 1.00    | 798.96 (762.38 to 831.50)    |
|           | Non-communicable diseases  | 14.02 (12.50 to 15.71)          | 0.75    | 24968.17 (22252.40 to 27981.57) | 0.36 (0.34 to 0.37)        | 0.80    | 637.95 (607.13 to 664.36)    |
|           | Cardiovascular diseases    | 2.52 (2.36 to 2.68)             | 0.14    | 4493.03 (4206.84 to 4777.18)    | 0.11 (0.11 to 0.12)        | 0.25    | 200.17 (187.72 to 213.14)    |
|           | Ischemic heart disease     | 1.09 (1.01 to 1.18)             | 0.06    | 1944.26 (1802.94 to 2094.97)    | 0.05 (0.05 to 0.06)        | 0.12    | 93.66 (86.99 to 101.44)      |
|           | Stroke                     | 0.87 (0.80 to 0.95)             | 0.05    | 1553.87 (1418.30 to 1694.76)    | 0.04 (0.03 to 0.04)        | 0.08    | 67.00 (61.55 to 73.01)       |
|           | Ischemic stroke            | 0.31 (0.27 to 0.36)             | 0.02    | 556.13 (475.74 to 635.51)       | 0.01 (0.01 to 0.01)        | 0.03    | 21.93 (19.58 to 24.55)       |
|           | Hypertensive heart disease | 0.07 (0.06 to 0.08)             | 0.00    | 123.06 (98.28 to 139.81)        | 0.00 (0.00 to 0.00)        | 0.01    | 5.00 (4.02 to 5.81)          |
|           | All causes                 | 35.12 (31.80 to 39.01)          | 1.00    | 31670.58 (28682.15 to 35178.15) | 1.14 (1.09 to 1.20)        | 1.00    | 1029.38 (979.47 to 1079.70)  |
|           | Non-communicable diseases  | 28.25 (25.43 to 31.43)          | 0.80    | 25479.85 (22931.17 to 28345.11) | 0.97 (0.92 to 1.02)        | 0.85    | 874.80 (832.36 to 918.68)    |
|           | Cardiovascular diseases    | 7.25 (6.88 to 7.62)             | 0.21    | 6534.88 (6206.15 to 6868.61)    | 0.41 (0.39 to 0.43)        | 0.36    | 370.36 (350.58 to 390.90)    |
| Grenada   | Ischemic heart disease     | 2.93 (2.77 to 3.10)             | 0.08    | 2641.36 (2494.65 to 2799.29)    | 0.17 (0.16 to 0.19)        | 0.15    | 156.57 (146.95 to 167.05)    |
|           | Stroke                     | 2.30 (2.16 to 2.45)             | 0.07    | 2074.09 (1944.38 to 2206.62)    | 0.13 (0.12 to 0.14)        | 0.12    | 120.97 (112.71 to 129.83)    |

**Table 3S National and regional disability-adjusted life years (DALYs) and deaths of non-communicable and cardiovascular diseases for 195 countries according to the GBD 2017 study.**

| Countries     | Cause                      | DALYs                        |         |                                 | Deaths                   |         |                            |
|---------------|----------------------------|------------------------------|---------|---------------------------------|--------------------------|---------|----------------------------|
|               |                            | Number (thousand)            | Percent | Rate                            | Number (thousand)        | Percent | Rate                       |
|               |                            | Mean (95% UI)                | Mean    | Mean (95% UI)                   | Mean (95% UI)            | Mean    | Mean (95% UI)              |
| Guam          | Ischemic stroke            | 0.98 (0.90 to 1.05)          | 0.03    | 881.50 (812.22 to 950.85)       | 0.06 (0.06 to 0.07)      | 0.06    | 58.21 (53.48 to 63.28)     |
|               | Hypertensive heart disease | 0.54 (0.42 to 0.63)          | 0.02    | 488.00 (376.15 to 571.87)       | 0.03 (0.02 to 0.04)      | 0.03    | 29.39 (20.89 to 34.20)     |
|               | All causes                 | 52.44 (47.30 to 58.08)       | 1.00    | 31247.30 (28182.99 to 34603.54) | 1.25 (1.18 to 1.33)      | 1.00    | 745.89 (702.41 to 790.09)  |
|               | Non-communicable diseases  | 40.97 (36.62 to 45.80)       | 0.78    | 24409.29 (21818.30 to 27288.60) | 1.07 (1.00 to 1.13)      | 0.85    | 635.10 (597.89 to 673.90)  |
|               | Cardiovascular diseases    | 12.65 (11.84 to 13.48)       | 0.24    | 7536.57 (7052.28 to 8031.02)    | 0.52 (0.49 to 0.55)      | 0.41    | 308.68 (289.54 to 328.88)  |
|               | Ischemic heart disease     | 7.63 (7.05 to 8.24)          | 0.15    | 4547.62 (4201.65 to 4907.31)    | 0.34 (0.31 to 0.37)      | 0.27    | 202.21 (186.86 to 217.85)  |
|               | Stroke                     | 2.80 (2.56 to 3.04)          | 0.05    | 1665.79 (1523.35 to 1809.69)    | 0.10 (0.09 to 0.11)      | 0.08    | 60.77 (55.67 to 65.76)     |
| Guatemala     | Ischemic stroke            | 1.07 (0.94 to 1.20)          | 0.02    | 635.23 (560.27 to 713.55)       | 0.04 (0.04 to 0.04)      | 0.03    | 24.29 (21.87 to 26.74)     |
|               | Hypertensive heart disease | 0.79 (0.68 to 1.08)          | 0.02    | 469.59 (403.44 to 643.53)       | 0.03 (0.03 to 0.04)      | 0.02    | 18.53 (15.93 to 26.57)     |
|               | All causes                 | 4878.00 (4327.31 to 5477.47) | 1.00    | 28822.63 (25568.73 to 32364.68) | 89.11 (82.12 to 97.07)   | 1.00    | 526.50 (485.22 to 573.55)  |
|               | Non-communicable diseases  | 2690.96 (2332.64 to 3100.21) | 0.55    | 15900.09 (13782.87 to 18318.17) | 53.74 (49.68 to 58.40)   | 0.60    | 317.51 (293.53 to 345.06)  |
|               | Cardiovascular diseases    | 348.30 (318.19 to 379.49)    | 0.07    | 2058.00 (1880.06 to 2242.26)    | 15.01 (13.84 to 16.29)   | 0.17    | 88.68 (81.75 to 96.25)     |
|               | Ischemic heart disease     | 167.95 (152.18 to 185.39)    | 0.03    | 992.36 (899.16 to 1095.40)      | 8.63 (7.85 to 9.42)      | 0.10    | 50.97 (46.39 to 55.67)     |
|               | Stroke                     | 105.84 (96.30 to 116.09)     | 0.02    | 625.37 (569.03 to 685.93)       | 4.37 (3.99 to 4.79)      | 0.05    | 25.85 (23.57 to 28.32)     |
| Guinea        | Ischemic stroke            | 29.93 (26.93 to 32.96)       | 0.01    | 176.83 (159.11 to 194.73)       | 1.57 (1.41 to 1.73)      | 0.02    | 9.26 (8.33 to 10.22)       |
|               | Hypertensive heart disease | 16.49 (13.97 to 23.69)       | 0.00    | 97.46 (82.56 to 139.96)         | 0.78 (0.65 to 1.28)      | 0.01    | 4.60 (3.86 to 7.59)        |
|               | All causes                 | 6868.48 (6094.85 to 7765.28) | 1.00    | 58109.00 (51563.96 to 65696.20) | 108.47 (98.59 to 120.13) | 1.00    | 917.65 (834.11 to 1016.32) |
|               | Non-communicable diseases  | 2046.64 (1782.42 to 2299.45) | 0.30    | 17315.09 (15079.67 to 19453.91) | 40.44 (36.11 to 44.70)   | 0.37    | 342.15 (305.50 to 378.21)  |
|               | Cardiovascular diseases    | 406.35 (360.82 to 452.33)    | 0.06    | 3437.81 (3052.64 to 3826.86)    | 16.15 (14.34 to 17.91)   | 0.15    | 136.64 (121.33 to 151.52)  |
|               | Ischemic heart disease     | 159.56 (137.86 to 183.23)    | 0.02    | 1349.88 (1166.31 to 1550.21)    | 7.31 (6.43 to 8.28)      | 0.07    | 61.88 (54.40 to 70.06)     |
|               | Stroke                     | 158.43 (136.83 to 182.00)    | 0.02    | 1340.39 (1157.62 to 1539.80)    | 6.29 (5.46 to 7.22)      | 0.06    | 53.24 (46.16 to 61.10)     |
| Guinea-Bissau | Ischemic stroke            | 48.92 (41.11 to 58.03)       | 0.01    | 413.87 (347.79 to 490.91)       | 2.31 (1.94 to 2.73)      | 0.02    | 19.54 (16.44 to 23.08)     |
|               | Hypertensive heart disease | 15.58 (7.95 to 24.08)        | 0.00    | 131.84 (67.26 to 203.71)        | 0.64 (0.32 to 0.99)      | 0.01    | 5.42 (2.72 to 8.35)        |
|               | All causes                 | 1023.36 (903.33 to 1162.90)  | 1.00    | 55151.76 (48683.01 to 62671.54) | 15.50 (13.78 to 17.36)   | 1.00    | 835.58 (742.58 to 935.46)  |
|               | Non-communicable diseases  | 340.89 (288.71 to 404.51)    | 0.33    | 18371.50 (15559.16 to 21799.96) | 5.93 (5.11 to 6.84)      | 0.38    | 319.48 (275.40 to 368.63)  |
|               | Cardiovascular diseases    | 65.07 (56.49 to 74.57)       | 0.06    | 3506.63 (3044.50 to 4018.52)    | 2.22 (1.94 to 2.54)      | 0.14    | 119.75 (104.32 to 136.80)  |
|               | Ischemic heart disease     | 24.85 (21.08 to 29.30)       | 0.02    | 1339.13 (1136.25 to 1578.94)    | 0.96 (0.83 to 1.12)      | 0.06    | 51.89 (44.46 to 60.23)     |
|               | Stroke                     | 25.44 (21.84 to 29.55)       | 0.02    | 1370.89 (1176.79 to 1592.55)    | 0.87 (0.74 to 1.00)      | 0.06    | 46.64 (40.06 to 54.16)     |
| Guyana        | Ischemic stroke            | 6.84 (5.73 to 8.19)          | 0.01    | 368.39 (309.00 to 441.28)       | 0.27 (0.22 to 0.32)      | 0.02    | 14.41 (11.96 to 17.42)     |
|               | Hypertensive heart disease | 2.86 (1.38 to 4.45)          | 0.00    | 154.20 (74.13 to 240.02)        | 0.10 (0.05 to 0.16)      | 0.01    | 5.45 (2.61 to 8.46)        |
|               | All causes                 | 258.42 (232.02 to 288.24)    | 1.00    | 34812.79 (31256.61 to 38830.28) | 5.56 (5.05 to 6.05)      | 1.00    | 748.84 (680.71 to 814.52)  |
|               | Non-communicable diseases  | 165.80 (147.33 to 187.31)    | 0.64    | 22336.20 (19847.21 to 25233.25) | 4.04 (3.67 to 4.41)      | 0.73    | 544.48 (493.94 to 594.58)  |
|               | Cardiovascular diseases    | 48.60 (43.88 to 53.40)       | 0.19    | 6547.11 (5911.63 to 7193.65)    | 2.03 (1.84 to 2.23)      | 0.37    | 274.05 (248.09 to 300.83)  |
|               | Ischemic heart disease     | 20.75 (18.61 to 23.08)       | 0.08    | 2795.41 (2506.77 to 3109.37)    | 0.91 (0.82 to 1.01)      | 0.16    | 122.72 (110.80 to 135.54)  |
|               | Stroke                     | 16.12 (14.53 to 17.79)       | 0.06    | 2171.45 (1956.97 to 2397.19)    | 0.69 (0.62 to 0.76)      | 0.12    | 92.90 (83.99 to 102.45)    |
|               | Ischemic stroke            | 4.75 (4.27 to 5.30)          | 0.02    | 640.27 (575.15 to 714.42)       | 0.23 (0.21 to 0.26)      | 0.04    | 31.23 (27.87 to 34.99)     |



**Table 3S National and regional disability-adjusted life years (DALYs) and deaths of non-communicable and cardiovascular diseases for 195 countries according to the GBD 2017 study.**

| Countries | Cause                      | DALYs                              |         |                                 | Deaths                        |         |                              |
|-----------|----------------------------|------------------------------------|---------|---------------------------------|-------------------------------|---------|------------------------------|
|           |                            | Number (thousand)                  | Percent | Rate                            | Number (thousand)             | Percent | Rate                         |
|           |                            | Mean (95% UI)                      | Mean    | Mean (95% UI)                   | Mean (95% UI)                 | Mean    | Mean (95% UI)                |
| Haiti     | Hypertensive heart disease | 4.86 (4.02 to 5.95)                | 0.02    | 654.80 (541.90 to 802.12)       | 0.21 (0.18 to 0.28)           | 0.04    | 28.72 (23.80 to 37.16)       |
|           | All causes                 | 5160.86 (4561.07 to 5854.06)       | 1.00    | 43644.21 (38571.92 to 49506.45) | 88.63 (78.33 to 100.40)       | 1.00    | 749.52 (662.41 to 849.08)    |
|           | Non-communicable diseases  | 2494.09 (2179.50 to 2843.65)       | 0.48    | 21091.96 (18431.51 to 24048.10) | 53.70 (46.21 to 61.48)        | 0.61    | 454.13 (390.75 to 519.92)    |
|           | Cardiovascular diseases    | 625.34 (531.34 to 730.85)          | 0.12    | 5288.35 (4493.43 to 6180.61)    | 23.98 (20.40 to 27.76)        | 0.27    | 202.77 (172.55 to 234.77)    |
|           | Ischemic heart disease     | 232.67 (190.13 to 280.54)          | 0.05    | 1967.62 (1607.88 to 2372.47)    | 9.99 (8.25 to 11.94)          | 0.11    | 84.49 (69.80 to 100.94)      |
|           | Stroke                     | 220.81 (182.83 to 265.94)          | 0.04    | 1867.35 (1546.12 to 2248.99)    | 8.59 (7.13 to 10.17)          | 0.10    | 72.62 (60.34 to 86.01)       |
|           | Ischemic stroke            | 65.47 (54.01 to 77.55)             | 0.01    | 553.68 (456.75 to 655.81)       | 3.02 (2.48 to 3.58)           | 0.03    | 25.57 (20.97 to 30.31)       |
| Honduras  | Hypertensive heart disease | 46.85 (29.61 to 61.61)             | 0.01    | 396.19 (250.40 to 521.06)       | 1.99 (1.27 to 2.58)           | 0.02    | 16.83 (10.76 to 21.79)       |
|           | All causes                 | 2287.65 (2013.55 to 2617.61)       | 1.00    | 24083.54 (21197.87 to 27557.20) | 44.43 (38.31 to 50.61)        | 1.00    | 467.72 (403.32 to 532.82)    |
|           | Non-communicable diseases  | 1441.97 (1242.24 to 1684.00)       | 0.63    | 15180.54 (13077.88 to 17728.52) | 32.01 (27.21 to 36.70)        | 0.72    | 336.95 (286.42 to 386.36)    |
|           | Cardiovascular diseases    | 290.07 (246.44 to 337.07)          | 0.13    | 3053.73 (2594.46 to 3548.53)    | 13.12 (10.97 to 15.31)        | 0.30    | 138.09 (115.51 to 161.20)    |
|           | Ischemic heart disease     | 172.07 (144.25 to 202.95)          | 0.08    | 1811.51 (1518.63 to 2136.54)    | 8.32 (6.87 to 9.76)           | 0.19    | 87.63 (72.32 to 102.73)      |
|           | Stroke                     | 67.23 (56.26 to 78.65)             | 0.03    | 707.79 (592.31 to 827.98)       | 3.05 (2.50 to 3.62)           | 0.07    | 32.11 (26.34 to 38.07)       |
|           | Ischemic stroke            | 29.44 (24.56 to 34.76)             | 0.01    | 309.89 (258.58 to 365.95)       | 1.64 (1.30 to 1.97)           | 0.04    | 17.23 (13.72 to 20.78)       |
| Hungary   | Hypertensive heart disease | 19.13 (15.09 to 26.58)             | 0.01    | 201.44 (158.85 to 279.82)       | 0.84 (0.63 to 1.22)           | 0.02    | 8.81 (6.67 to 12.83)         |
|           | All causes                 | 3604.45 (3230.55 to 4014.18)       | 1.00    | 37054.77 (33210.96 to 41266.87) | 122.04 (117.08 to 127.41)     | 1.00    | 1254.56 (1203.64 to 1309.77) |
|           | Non-communicable diseases  | 3095.70 (2792.85 to 3422.11)       | 0.86    | 31824.68 (28711.32 to 35180.20) | 114.40 (109.73 to 119.34)     | 0.94    | 1176.04 (1128.03 to 1226.84) |
|           | Cardiovascular diseases    | 934.66 (885.42 to 986.87)          | 0.26    | 9608.57 (9102.35 to 10145.30)   | 57.21 (54.91 to 59.75)        | 0.47    | 588.15 (564.49 to 614.29)    |
|           | Ischemic heart disease     | 501.12 (476.28 to 531.30)          | 0.14    | 5151.63 (4896.28 to 5461.90)    | 34.17 (32.58 to 35.99)        | 0.28    | 351.24 (334.89 to 370.02)    |
|           | Stroke                     | 226.60 (208.17 to 244.30)          | 0.06    | 2329.55 (2140.06 to 2511.50)    | 11.77 (11.08 to 12.50)        | 0.10    | 120.96 (113.92 to 128.51)    |
|           | Ischemic stroke            | 159.68 (144.56 to 174.24)          | 0.04    | 1641.60 (1486.16 to 1791.20)    | 8.58 (8.06 to 9.12)           | 0.07    | 88.17 (82.86 to 93.74)       |
| Iceland   | Hypertensive heart disease | 67.80 (46.17 to 75.12)             | 0.02    | 697.03 (474.61 to 772.25)       | 4.65 (2.78 to 5.16)           | 0.04    | 47.83 (28.62 to 53.01)       |
|           | All causes                 | 75.42 (64.75 to 87.62)             | 1.00    | 22348.55 (19185.56 to 25963.12) | 2.20 (2.14 to 2.28)           | 1.00    | 653.08 (633.66 to 674.54)    |
|           | Non-communicable diseases  | 64.88 (55.53 to 75.61)             | 0.86    | 19226.60 (16453.84 to 22404.33) | 1.97 (1.91 to 2.04)           | 0.89    | 584.11 (566.56 to 603.82)    |
|           | Cardiovascular diseases    | 10.37 (9.76 to 11.03)              | 0.14    | 3073.31 (2890.84 to 3269.47)    | 0.74 (0.71 to 0.77)           | 0.33    | 218.76 (211.25 to 226.85)    |
|           | Ischemic heart disease     | 5.59 (5.34 to 5.88)                | 0.07    | 1657.79 (1582.40 to 1741.30)    | 0.44 (0.43 to 0.46)           | 0.20    | 131.36 (126.55 to 136.90)    |
|           | Stroke                     | 2.27 (2.08 to 2.48)                | 0.03    | 672.85 (615.48 to 734.99)       | 0.15 (0.14 to 0.16)           | 0.07    | 43.89 (41.32 to 46.58)       |
|           | Ischemic stroke            | 1.27 (1.12 to 1.44)                | 0.02    | 376.55 (330.49 to 425.61)       | 0.08 (0.08 to 0.09)           | 0.04    | 25.04 (23.47 to 26.94)       |
| India     | Hypertensive heart disease | 0.24 (0.17 to 0.27)                | 0.00    | 70.34 (50.56 to 79.52)          | 0.02 (0.01 to 0.02)           | 0.01    | 5.78 (3.05 to 6.67)          |
|           | All causes                 | 480731.95 (441714.56 to 526290.40) | 1.00    | 34821.51 (31995.31 to 38121.51) | 9909.50 (9731.58 to 10093.18) | 1.00    | 717.79 (704.90 to 731.09)    |
|           | Non-communicable diseases  | 269176.26 (241103.84 to 301575.73) | 0.56    | 19497.61 (17464.20 to 21844.44) | 6289.77 (5977.56 to 6495.63)  | 0.63    | 455.60 (432.98 to 470.51)    |
|           | Cardiovascular diseases    | 65117.83 (62327.78 to 67477.62)    | 0.14    | 4716.77 (4514.67 to 4887.70)    | 2632.78 (2489.26 to 2726.49)  | 0.27    | 190.70 (180.31 to 197.49)    |
|           | Ischemic heart disease     | 36987.50 (35381.26 to 38327.29)    | 0.08    | 2679.17 (2562.82 to 2776.21)    | 1540.33 (1459.04 to 1598.87)  | 0.16    | 111.57 (105.68 to 115.81)    |
|           | Stroke                     | 17611.21 (16734.08 to 18415.49)    | 0.04    | 1275.66 (1212.12 to 1333.91)    | 726.23 (684.96 to 760.01)     | 0.07    | 52.60 (49.61 to 55.05)       |

**Table 3S National and regional disability-adjusted life years (DALYs) and deaths of non-communicable and cardiovascular diseases for 195 countries according to the GBD 2017 study.**

| Countries | Cause                      | DALYs                           |         |                                 | Deaths                       |         |                           |
|-----------|----------------------------|---------------------------------|---------|---------------------------------|------------------------------|---------|---------------------------|
|           |                            | Number (thousand)               | Percent | Rate                            | Number (thousand)            | Percent | Rate                      |
|           |                            | Mean (95% UI)                   | Mean    | Mean (95% UI)                   | Mean (95% UI)                | Mean    | Mean (95% UI)             |
| Indonesia | Ischemic stroke            | 6346.13 (5419.79 to 7606.49)    | 0.01    | 459.68 (392.58 to 550.97)       | 289.97 (248.18 to 348.67)    | 0.03    | 21.00 (17.98 to 25.26)    |
|           | Hypertensive heart disease | 2050.13 (1519.16 to 2561.91)    | 0.00    | 148.50 (110.04 to 185.57)       | 98.91 (72.73 to 123.12)      | 0.01    | 7.16 (5.27 to 8.92)       |
|           | All causes                 | 74647.66 (67764.73 to 82775.51) | 1.00    | 28918.11 (26251.69 to 32066.79) | 1642.53 (1572.16 to 1719.46) | 1.00    | 636.31 (609.05 to 666.11) |
|           | Non-communicable diseases  | 52215.60 (46545.99 to 58674.74) | 0.70    | 20228.04 (18031.67 to 22730.28) | 1239.74 (1177.56 to 1307.39) | 0.75    | 480.27 (456.18 to 506.48) |
|           | Cardiovascular diseases    | 14617.32 (13831.28 to 15454.91) | 0.20    | 5662.67 (5358.16 to 5987.15)    | 597.99 (566.52 to 633.16)    | 0.36    | 231.66 (219.47 to 245.28) |
|           | Ischemic heart disease     | 5717.63 (5394.05 to 6076.34)    | 0.08    | 2214.98 (2089.63 to 2353.94)    | 234.75 (221.18 to 249.72)    | 0.14    | 90.94 (85.68 to 96.74)    |
|           | Stroke                     | 7377.27 (6968.42 to 7798.62)    | 0.10    | 2857.91 (2699.53 to 3021.14)    | 308.49 (290.39 to 328.00)    | 0.19    | 119.51 (112.50 to 127.07) |
| Iran      | Ischemic stroke            | 2283.19 (2034.40 to 2517.47)    | 0.03    | 884.49 (788.12 to 975.26)       | 108.92 (97.85 to 119.77)     | 0.07    | 42.20 (37.91 to 46.40)    |
|           | Hypertensive heart disease | 538.68 (434.46 to 627.31)       | 0.01    | 208.68 (168.31 to 243.01)       | 24.01 (19.43 to 28.26)       | 0.01    | 9.30 (7.53 to 10.95)      |
|           | All causes                 | 20376.96 (17898.89 to 23139.04) | 1.00    | 24796.70 (21781.13 to 28157.87) | 380.01 (378.02 to 381.86)    | 1.00    | 462.43 (460.02 to 464.68) |
|           | Non-communicable diseases  | 15509.60 (13322.79 to 17930.62) | 0.76    | 18873.61 (16212.48 to 21819.75) | 312.81 (310.70 to 314.75)    | 0.82    | 380.66 (378.09 to 383.02) |
|           | Cardiovascular diseases    | 3214.11 (3100.19 to 3337.67)    | 0.16    | 3911.25 (3772.61 to 4061.61)    | 161.33 (159.00 to 166.16)    | 0.42    | 196.32 (193.48 to 202.20) |
|           | Ischemic heart disease     | 1766.63 (1718.88 to 1876.94)    | 0.09    | 2149.81 (2091.70 to 2284.04)    | 95.56 (93.33 to 101.44)      | 0.25    | 116.28 (113.57 to 123.44) |
|           | Stroke                     | 774.57 (725.67 to 823.50)       | 0.04    | 942.58 (883.06 to 1002.11)      | 36.36 (35.10 to 38.65)       | 0.10    | 44.25 (42.71 to 47.04)    |
| Iraq      | Ischemic stroke            | 549.05 (512.35 to 585.06)       | 0.03    | 668.13 (623.48 to 711.96)       | 28.05 (27.07 to 29.93)       | 0.07    | 34.14 (32.95 to 36.42)    |
|           | Hypertensive heart disease | 290.67 (246.92 to 309.14)       | 0.01    | 353.71 (300.47 to 376.19)       | 17.14 (13.81 to 18.14)       | 0.05    | 20.86 (16.81 to 22.07)    |
|           | All causes                 | 11735.93 (10497.50 to 13183.41) | 1.00    | 27100.99 (24241.15 to 30443.56) | 152.18 (144.60 to 160.52)    | 1.00    | 351.41 (333.91 to 370.68) |
|           | Non-communicable diseases  | 6033.37 (5119.70 to 7022.00)    | 0.51    | 13932.46 (11822.57 to 16215.44) | 83.01 (78.52 to 88.05)       | 0.55    | 191.69 (181.31 to 203.32) |
|           | Cardiovascular diseases    | 1142.64 (1070.50 to 1221.47)    | 0.10    | 2638.63 (2472.04 to 2820.65)    | 43.07 (40.63 to 45.74)       | 0.28    | 99.46 (93.83 to 105.63)   |
|           | Ischemic heart disease     | 555.17 (519.90 to 597.01)       | 0.05    | 1282.01 (1200.56 to 1378.63)    | 25.02 (23.48 to 26.74)       | 0.16    | 57.78 (54.22 to 61.75)    |
|           | Stroke                     | 370.66 (342.06 to 399.20)       | 0.03    | 855.95 (789.89 to 921.85)       | 13.21 (12.38 to 14.09)       | 0.09    | 30.51 (28.58 to 32.55)    |
| Ireland   | Ischemic stroke            | 152.21 (136.71 to 166.81)       | 0.01    | 351.48 (315.69 to 385.21)       | 6.20 (5.76 to 6.67)          | 0.04    | 14.33 (13.30 to 15.39)    |
|           | Hypertensive heart disease | 33.89 (30.10 to 40.15)          | 0.00    | 78.27 (69.50 to 92.72)          | 1.39 (1.24 to 1.81)          | 0.01    | 3.22 (2.87 to 4.17)       |
|           | All causes                 | 1109.55 (958.96 to 1286.15)     | 1.00    | 22827.71 (19729.50 to 26460.94) | 30.81 (29.29 to 32.33)       | 1.00    | 633.88 (602.54 to 665.12) |
|           | Non-communicable diseases  | 967.65 (836.97 to 1122.12)      | 0.87    | 19908.27 (17219.73 to 23086.25) | 27.97 (26.58 to 29.35)       | 0.91    | 575.36 (546.86 to 603.79) |
|           | Cardiovascular diseases    | 149.33 (138.15 to 160.41)       | 0.14    | 3072.34 (2842.18 to 3300.26)    | 9.68 (9.12 to 10.26)         | 0.31    | 199.18 (187.73 to 211.06) |
|           | Ischemic heart disease     | 76.27 (71.04 to 81.88)          | 0.07    | 1569.13 (1461.46 to 1684.65)    | 5.42 (5.09 to 5.82)          | 0.18    | 111.52 (104.74 to 119.68) |
|           | Stroke                     | 34.63 (31.52 to 37.90)          | 0.03    | 712.37 (648.57 to 779.85)       | 2.15 (2.00 to 2.32)          | 0.07    | 44.28 (41.22 to 47.64)    |
| Israel    | Ischemic stroke            | 17.75 (15.64 to 19.83)          | 0.02    | 365.18 (321.85 to 408.00)       | 1.14 (1.05 to 1.23)          | 0.04    | 23.38 (21.58 to 25.30)    |
|           | Hypertensive heart disease | 2.31 (1.90 to 2.95)             | 0.00    | 47.55 (39.14 to 60.62)          | 0.16 (0.11 to 0.19)          | 0.01    | 3.28 (2.31 to 3.89)       |
|           | All causes                 | 1727.45 (1472.85 to 2017.03)    | 1.00    | 19302.87 (16457.91 to 22538.68) | 45.68 (43.61 to 47.88)       | 1.00    | 510.40 (487.29 to 534.97) |
|           | Non-communicable diseases  | 1447.74 (1227.13 to 1689.20)    | 0.84    | 16177.26 (13712.17 to 18875.46) | 40.24 (38.38 to 42.25)       | 0.88    | 449.64 (428.88 to 472.09) |
|           | Cardiovascular diseases    | 178.99 (166.38 to 191.78)       | 0.10    | 2000.08 (1859.15 to 2143.03)    | 11.85 (11.20 to 12.54)       | 0.26    | 132.40 (125.14 to 140.13) |
|           | Ischemic heart disease     | 80.31 (74.76 to 85.98)          | 0.05    | 897.38 (835.40 to 960.76)       | 6.05 (5.69 to 6.42)          | 0.13    | 67.56 (63.57 to 71.72)    |
|           | Stroke                     | 50.09 (45.35 to 54.52)          | 0.03    | 559.71 (506.79 to 609.17)       | 3.04 (2.84 to 3.27)          | 0.07    | 34.00 (31.74 to 36.49)    |
|           | Ischemic stroke            | 24.89 (21.45 to 28.11)          | 0.01    | 278.17 (239.73 to 314.15)       | 1.47 (1.36 to 1.60)          | 0.03    | 16.47 (15.15 to 17.83)    |



**Table 3S National and regional disability-adjusted life years (DALYs) and deaths of non-communicable and cardiovascular diseases for 195 countries according to the GBD 2017 study.**

| Countries  | Cause                      | DALYs                           |         |                                 | Deaths                       |         |                              |
|------------|----------------------------|---------------------------------|---------|---------------------------------|------------------------------|---------|------------------------------|
|            |                            | Number (thousand)               | Percent | Rate                            | Number (thousand)            | Percent | Rate                         |
|            |                            | Mean (95% UI)                   | Mean    | Mean (95% UI)                   | Mean (95% UI)                | Mean    | Mean (95% UI)                |
| Italy      | Hypertensive heart disease | 3.30 (2.64 to 6.25)             | 0.00    | 36.90 (29.52 to 69.79)          | 0.23 (0.19 to 0.44)          | 0.00    | 2.52 (2.08 to 4.88)          |
|            | All causes                 | 16493.04 (14333.70 to 18969.10) | 1.00    | 27217.37 (23653.96 to 31303.45) | 622.13 (594.42 to 649.34)    | 1.00    | 1026.66 (980.93 to 1071.57)  |
|            | Non-communicable diseases  | 14724.10 (12826.62 to 16919.76) | 0.89    | 24298.20 (21166.93 to 27921.56) | 580.98 (555.26 to 606.00)    | 0.93    | 958.74 (916.30 to 1000.03)   |
|            | Cardiovascular diseases    | 2636.26 (2466.95 to 2808.29)    | 0.16    | 4350.44 (4071.05 to 4634.34)    | 216.58 (206.67 to 227.00)    | 0.35    | 357.42 (341.06 to 374.61)    |
|            | Ischemic heart disease     | 1109.84 (1033.99 to 1203.91)    | 0.07    | 1831.50 (1706.32 to 1986.73)    | 96.46 (89.82 to 107.29)      | 0.16    | 159.18 (148.23 to 177.05)    |
|            | Stroke                     | 700.53 (647.33 to 764.26)       | 0.04    | 1156.04 (1068.25 to 1261.21)    | 59.35 (55.16 to 66.25)       | 0.10    | 97.95 (91.03 to 109.33)      |
|            | Ischemic stroke            | 340.45 (306.75 to 376.60)       | 0.02    | 561.82 (506.20 to 621.48)       | 30.68 (28.23 to 34.69)       | 0.05    | 50.63 (46.59 to 57.24)       |
| Jamaica    | Hypertensive heart disease | 218.17 (121.59 to 249.90)       | 0.01    | 360.04 (200.66 to 412.40)       | 22.00 (7.37 to 26.03)        | 0.04    | 36.31 (12.17 to 42.95)       |
|            | All causes                 | 780.01 (685.67 to 887.21)       | 1.00    | 28065.26 (24670.94 to 31922.44) | 20.26 (18.19 to 22.59)       | 1.00    | 728.97 (654.62 to 812.72)    |
|            | Non-communicable diseases  | 575.48 (501.06 to 658.59)       | 0.74    | 20706.14 (18028.52 to 23696.50) | 16.94 (15.12 to 18.92)       | 0.84    | 609.43 (544.09 to 680.86)    |
|            | Cardiovascular diseases    | 117.28 (104.28 to 132.22)       | 0.15    | 4219.89 (3752.20 to 4757.37)    | 6.28 (5.61 to 7.04)          | 0.31    | 225.91 (202.00 to 253.26)    |
|            | Ischemic heart disease     | 37.51 (32.36 to 42.96)          | 0.05    | 1349.67 (1164.33 to 1545.77)    | 2.18 (1.91 to 2.47)          | 0.11    | 78.52 (68.84 to 88.81)       |
|            | Stroke                     | 50.28 (43.84 to 57.38)          | 0.06    | 1809.24 (1577.29 to 2064.50)    | 2.77 (2.43 to 3.16)          | 0.14    | 99.70 (87.43 to 113.55)      |
|            | Ischemic stroke            | 16.00 (13.97 to 18.17)          | 0.02    | 575.54 (502.70 to 653.89)       | 1.02 (0.89 to 1.17)          | 0.05    | 36.87 (32.15 to 42.04)       |
| Japan      | Hypertensive heart disease | 9.93 (8.01 to 14.42)            | 0.01    | 357.35 (288.14 to 518.75)       | 0.57 (0.46 to 0.83)          | 0.03    | 20.58 (16.54 to 30.03)       |
|            | All causes                 | 35129.02 (30654.61 to 40267.94) | 1.00    | 27366.88 (23881.14 to 31370.30) | 1371.73 (1347.73 to 1396.46) | 1.00    | 1068.63 (1049.94 to 1087.90) |
|            | Non-communicable diseases  | 29209.31 (25404.22 to 33572.71) | 0.83    | 22755.19 (19790.88 to 26154.46) | 1177.92 (1158.15 to 1198.78) | 0.86    | 917.65 (902.25 to 933.89)    |
|            | Cardiovascular diseases    | 5211.33 (4893.66 to 5542.95)    | 0.15    | 4059.83 (3812.35 to 4318.17)    | 368.09 (359.04 to 377.10)    | 0.27    | 286.76 (279.71 to 293.77)    |
|            | Ischemic heart disease     | 1832.25 (1761.62 to 1904.08)    | 0.05    | 1427.39 (1372.37 to 1483.36)    | 151.05 (146.22 to 155.58)    | 0.11    | 117.68 (113.91 to 121.20)    |
|            | Stroke                     | 2217.89 (2023.13 to 2412.04)    | 0.06    | 1727.82 (1576.10 to 1879.08)    | 140.00 (135.87 to 144.08)    | 0.10    | 109.06 (105.85 to 112.24)    |
|            | Ischemic stroke            | 1196.75 (1059.44 to 1329.91)    | 0.03    | 932.31 (825.35 to 1036.05)      | 83.46 (80.86 to 86.39)       | 0.06    | 65.02 (62.99 to 67.30)       |
| Jordan     | Hypertensive heart disease | 144.19 (117.11 to 239.63)       | 0.00    | 112.33 (91.23 to 186.68)        | 11.20 (9.60 to 21.98)        | 0.01    | 8.72 (7.48 to 17.12)         |
|            | All causes                 | 2063.62 (1756.80 to 2406.32)    | 1.00    | 19379.48 (16498.17 to 22597.82) | 27.52 (25.19 to 30.07)       | 1.00    | 258.40 (236.57 to 282.39)    |
|            | Non-communicable diseases  | 1482.73 (1248.13 to 1743.44)    | 0.72    | 13924.39 (11721.27 to 16372.73) | 21.39 (19.54 to 23.55)       | 0.78    | 200.89 (183.46 to 221.18)    |
|            | Cardiovascular diseases    | 219.44 (199.40 to 242.15)       | 0.11    | 2060.77 (1872.59 to 2274.07)    | 9.02 (8.17 to 10.03)         | 0.33    | 84.69 (76.76 to 94.15)       |
|            | Ischemic heart disease     | 111.32 (99.12 to 126.19)        | 0.05    | 1045.38 (930.87 to 1185.04)     | 4.74 (4.20 to 5.39)          | 0.17    | 44.50 (39.48 to 50.63)       |
|            | Stroke                     | 57.98 (51.81 to 64.92)          | 0.03    | 544.52 (486.57 to 609.62)       | 2.36 (2.11 to 2.69)          | 0.09    | 22.20 (19.80 to 25.30)       |
|            | Ischemic stroke            | 36.96 (32.82 to 41.72)          | 0.02    | 347.05 (308.26 to 391.84)       | 1.62 (1.44 to 1.86)          | 0.06    | 15.23 (13.53 to 17.51)       |
| Kazakhstan | Hypertensive heart disease | 26.54 (19.23 to 30.80)          | 0.01    | 249.21 (180.61 to 289.24)       | 1.30 (0.88 to 1.51)          | 0.05    | 12.19 (8.29 to 14.21)        |
|            | All causes                 | 5608.90 (5119.59 to 6187.92)    | 1.00    | 31327.04 (28594.13 to 34561.02) | 134.59 (129.77 to 139.82)    | 1.00    | 751.73 (724.81 to 780.91)    |
|            | Non-communicable diseases  | 4125.65 (3757.13 to 4584.68)    | 0.74    | 23042.77 (20984.48 to 25606.56) | 113.20 (109.08 to 117.56)    | 0.84    | 632.26 (609.22 to 656.57)    |
|            | Cardiovascular diseases    | 1434.55 (1371.39 to 1503.39)    | 0.26    | 8012.31 (7659.56 to 8396.82)    | 67.34 (64.67 to 69.95)       | 0.50    | 376.11 (361.19 to 390.70)    |
|            | Ischemic heart disease     | 714.10 (673.29 to 775.05)       | 0.13    | 3988.44 (3760.49 to 4328.86)    | 38.56 (36.84 to 40.55)       | 0.29    | 215.34 (205.75 to 226.51)    |
|            | Stroke                     | 435.86 (404.08 to 471.17)       | 0.08    | 2434.40 (2256.89 to 2631.57)    | 19.59 (18.40 to 20.75)       | 0.15    | 109.44 (102.80 to 115.91)    |
|            | Ischemic stroke            | 235.98 (218.32 to 254.11)       | 0.04    | 1318.02 (1219.36 to 1419.26)    | 11.44 (10.77 to 12.17)       | 0.09    | 63.90 (60.17 to 67.99)       |
|            | Hypertensive heart disease | 38.17 (33.01 to 61.79)          | 0.01    | 213.17 (184.34 to 345.13)       | 1.63 (1.37 to 2.88)          | 0.01    | 9.09 (7.67 to 16.07)         |

**Table 3S National and regional disability-adjusted life years (DALYs) and deaths of non-communicable and cardiovascular diseases for 195 countries according to the GBD 2017 study.**

| Countries  | Cause                      | DALYs                           |         |                                 | Deaths                    |         |                              |
|------------|----------------------------|---------------------------------|---------|---------------------------------|---------------------------|---------|------------------------------|
|            |                            | Number (thousand)               | Percent | Rate                            | Number (thousand)         | Percent | Rate                         |
|            |                            | Mean (95% UI)                   | Mean    | Mean (95% UI)                   | Mean (95% UI)             | Mean    | Mean (95% UI)                |
| Kenya      | All causes                 | 17856.95 (16706.84 to 19268.59) | 1.00    | 36950.44 (34570.58 to 39871.45) | 288.90 (280.69 to 297.17) | 1.00    | 597.80 (580.81 to 614.92)    |
|            | Non-communicable diseases  | 6417.84 (5613.34 to 7351.16)    | 0.36    | 13280.09 (11615.38 to 15211.36) | 111.28 (103.76 to 117.47) | 0.39    | 230.26 (214.71 to 243.08)    |
|            | Cardiovascular diseases    | 950.65 (874.13 to 1043.70)      | 0.05    | 1967.13 (1808.78 to 2159.67)    | 35.99 (32.96 to 39.82)    | 0.12    | 74.48 (68.20 to 82.40)       |
|            | Ischemic heart disease     | 351.02 (308.64 to 404.81)       | 0.02    | 726.35 (638.65 to 837.64)       | 14.47 (12.63 to 16.96)    | 0.05    | 29.93 (26.13 to 35.08)       |
|            | Stroke                     | 352.34 (312.92 to 393.58)       | 0.02    | 729.07 (647.52 to 814.41)       | 13.97 (12.06 to 15.98)    | 0.05    | 28.91 (24.96 to 33.07)       |
|            | Ischemic stroke            | 95.12 (73.93 to 112.14)         | 0.01    | 196.83 (152.98 to 232.05)       | 4.25 (3.07 to 5.16)       | 0.01    | 8.79 (6.36 to 10.69)         |
|            | Hypertensive heart disease | 74.02 (43.85 to 96.83)          | 0.00    | 153.17 (90.74 to 200.36)        | 3.39 (1.97 to 4.65)       | 0.01    | 7.02 (4.07 to 9.62)          |
| Kiribati   | All causes                 | 53.66 (47.71 to 60.33)          | 1.00    | 45382.34 (40348.85 to 51024.83) | 1.01 (0.91 to 1.12)       | 1.00    | 853.51 (765.75 to 951.22)    |
|            | Non-communicable diseases  | 32.62 (28.66 to 36.51)          | 0.61    | 27586.50 (24235.12 to 30878.93) | 0.69 (0.62 to 0.78)       | 0.69    | 586.28 (522.45 to 656.07)    |
|            | Cardiovascular diseases    | 8.89 (7.72 to 10.24)            | 0.17    | 7519.93 (6532.87 to 8657.43)    | 0.27 (0.24 to 0.31)       | 0.27    | 228.59 (200.67 to 258.58)    |
|            | Ischemic heart disease     | 3.38 (2.88 to 3.94)             | 0.06    | 2862.43 (2437.15 to 3331.68)    | 0.11 (0.10 to 0.13)       | 0.11    | 94.11 (81.28 to 107.27)      |
|            | Stroke                     | 3.72 (3.21 to 4.28)             | 0.07    | 3142.75 (2712.56 to 3623.15)    | 0.11 (0.10 to 0.13)       | 0.11    | 95.35 (83.09 to 108.21)      |
|            | Ischemic stroke            | 0.74 (0.64 to 0.84)             | 0.01    | 627.24 (543.76 to 713.07)       | 0.03 (0.02 to 0.03)       | 0.03    | 22.00 (19.05 to 24.90)       |
|            | Hypertensive heart disease | 0.40 (0.31 to 0.49)             | 0.01    | 341.16 (259.44 to 415.14)       | 0.01 (0.01 to 0.02)       | 0.01    | 11.39 (8.85 to 13.65)        |
| Kuwait     | All causes                 | 719.01 (599.18 to 856.70)       | 1.00    | 16869.47 (14058.11 to 20099.90) | 7.73 (7.35 to 8.14)       | 1.00    | 181.43 (172.55 to 191.04)    |
|            | Non-communicable diseases  | 573.97 (468.77 to 690.08)       | 0.80    | 13466.55 (10998.19 to 16190.73) | 5.93 (5.63 to 6.25)       | 0.77    | 139.16 (132.16 to 146.73)    |
|            | Cardiovascular diseases    | 92.50 (86.31 to 99.08)          | 0.13    | 2170.30 (2025.06 to 2324.70)    | 3.09 (2.91 to 3.29)       | 0.40    | 72.59 (68.23 to 77.11)       |
|            | Ischemic heart disease     | 56.84 (52.31 to 61.20)          | 0.08    | 1333.57 (1227.27 to 1435.91)    | 2.00 (1.85 to 2.15)       | 0.26    | 46.85 (43.48 to 50.38)       |
|            | Stroke                     | 19.45 (17.51 to 21.33)          | 0.03    | 456.45 (410.76 to 500.36)       | 0.63 (0.58 to 0.68)       | 0.08    | 14.73 (13.64 to 15.94)       |
|            | Ischemic stroke            | 11.25 (10.03 to 12.43)          | 0.02    | 263.95 (235.29 to 291.67)       | 0.41 (0.38 to 0.45)       | 0.05    | 9.71 (8.96 to 10.53)         |
|            | Hypertensive heart disease | 6.20 (5.24 to 9.15)             | 0.01    | 145.53 (122.84 to 214.73)       | 0.24 (0.20 to 0.36)       | 0.03    | 5.61 (4.77 to 8.34)          |
| Kyrgyzstan | All causes                 | 1695.21 (1537.04 to 1881.78)    | 1.00    | 26618.30 (24134.83 to 29547.95) | 33.90 (33.10 to 34.69)    | 1.00    | 532.32 (519.71 to 544.64)    |
|            | Non-communicable diseases  | 1130.03 (1011.68 to 1267.01)    | 0.67    | 17743.90 (15885.46 to 19894.77) | 27.34 (26.73 to 27.94)    | 0.81    | 429.35 (419.80 to 438.79)    |
|            | Cardiovascular diseases    | 347.95 (335.18 to 361.05)       | 0.21    | 5463.49 (5263.03 to 5669.30)    | 16.56 (16.12 to 17.05)    | 0.49    | 259.97 (253.08 to 267.69)    |
|            | Ischemic heart disease     | 192.73 (184.77 to 202.56)       | 0.11    | 3026.26 (2901.32 to 3180.66)    | 10.75 (10.41 to 11.15)    | 0.32    | 168.81 (163.43 to 175.09)    |
|            | Stroke                     | 110.84 (104.60 to 117.34)       | 0.07    | 1740.36 (1642.40 to 1842.48)    | 4.53 (4.33 to 4.74)       | 0.13    | 71.20 (68.01 to 74.45)       |
|            | Ischemic stroke            | 37.42 (34.54 to 40.33)          | 0.02    | 587.61 (542.42 to 633.28)       | 1.71 (1.62 to 1.80)       | 0.05    | 26.83 (25.45 to 28.31)       |
|            | Hypertensive heart disease | 9.35 (7.55 to 11.51)            | 0.01    | 146.78 (118.47 to 180.71)       | 0.41 (0.33 to 0.52)       | 0.01    | 6.38 (5.14 to 8.17)          |
| Laos       | All causes                 | 2568.15 (2283.47 to 2904.68)    | 1.00    | 36844.85 (32760.56 to 41673.03) | 45.56 (41.36 to 50.34)    | 1.00    | 653.57 (593.44 to 722.19)    |
|            | Non-communicable diseases  | 1368.37 (1181.27 to 1560.59)    | 0.53    | 19631.72 (16947.45 to 22389.55) | 28.66 (24.99 to 32.24)    | 0.63    | 411.13 (358.57 to 462.59)    |
|            | Cardiovascular diseases    | 345.43 (290.84 to 396.22)       | 0.13    | 4955.83 (4172.60 to 5684.54)    | 13.15 (11.47 to 15.04)    | 0.29    | 188.60 (164.54 to 215.82)    |
|            | Ischemic heart disease     | 140.30 (114.27 to 164.88)       | 0.05    | 2012.80 (1639.38 to 2365.48)    | 5.62 (4.85 to 6.49)       | 0.12    | 80.61 (69.54 to 93.16)       |
|            | Stroke                     | 149.37 (126.44 to 171.71)       | 0.06    | 2142.94 (1814.01 to 2463.48)    | 5.92 (5.13 to 6.76)       | 0.13    | 84.86 (73.58 to 96.93)       |
|            | Ischemic stroke            | 45.12 (38.65 to 51.74)          | 0.02    | 647.37 (554.57 to 742.34)       | 2.11 (1.82 to 2.44)       | 0.05    | 30.31 (26.10 to 35.02)       |
|            | Hypertensive heart disease | 14.30 (9.79 to 18.40)           | 0.01    | 205.09 (140.45 to 263.97)       | 0.60 (0.41 to 0.76)       | 0.01    | 8.59 (5.89 to 10.94)         |
| Latvia     | All causes                 | 796.60 (706.61 to 885.66)       | 1.00    | 40947.22 (36321.38 to 45525.26) | 28.05 (25.69 to 30.52)    | 1.00    | 1442.04 (1320.57 to 1568.98) |

**Table 3S National and regional disability-adjusted life years (DALYs) and deaths of non-communicable and cardiovascular diseases for 195 countries according to the GBD 2017 study.**

| Countries | Cause                      | DALYs                        |         |                                 | Deaths                 |         |                              |
|-----------|----------------------------|------------------------------|---------|---------------------------------|------------------------|---------|------------------------------|
|           |                            | Number (thousand)            | Percent | Rate                            | Number (thousand)      | Percent | Rate                         |
|           |                            | Mean (95% UI)                | Mean    | Mean (95% UI)                   | Mean (95% UI)          | Mean    | Mean (95% UI)                |
| Lebanon   | Non-communicable diseases  | 665.72 (590.47 to 736.34)    | 0.84    | 34219.81 (30351.53 to 37849.97) | 25.79 (23.61 to 28.04) | 0.92    | 1325.47 (1213.58 to 1441.58) |
|           | Cardiovascular diseases    | 249.93 (228.12 to 273.93)    | 0.31    | 12847.01 (11726.16 to 14080.78) | 15.46 (14.14 to 16.88) | 0.55    | 794.86 (727.04 to 867.66)    |
|           | Ischemic heart disease     | 128.28 (115.92 to 143.25)    | 0.16    | 6593.68 (5958.39 to 7363.65)    | 8.91 (8.12 to 9.91)    | 0.32    | 458.16 (417.47 to 509.59)    |
|           | Stroke                     | 76.96 (69.05 to 85.07)       | 0.10    | 3955.97 (3549.56 to 4372.91)    | 4.60 (4.12 to 5.15)    | 0.16    | 236.50 (211.80 to 264.78)    |
|           | Ischemic stroke            | 57.33 (51.26 to 63.22)       | 0.07    | 2947.00 (2634.72 to 3249.58)    | 3.57 (3.20 to 3.96)    | 0.13    | 183.66 (164.55 to 203.34)    |
|           | Hypertensive heart disease | 9.24 (2.62 to 11.35)         | 0.01    | 474.77 (134.87 to 583.46)       | 0.63 (0.14 to 0.79)    | 0.02    | 32.38 (7.22 to 40.42)        |
|           | All causes                 | 1797.72 (1551.72 to 2068.83) | 1.00    | 21119.88 (18229.79 to 24304.90) | 33.58 (31.80 to 35.49) | 1.00    | 394.48 (373.56 to 416.95)    |
|           | Non-communicable diseases  | 1438.77 (1226.38 to 1670.04) | 0.80    | 16902.94 (14407.73 to 19619.84) | 29.19 (27.77 to 30.79) | 0.87    | 342.96 (326.27 to 361.74)    |
|           | Cardiovascular diseases    | 286.26 (268.62 to 304.93)    | 0.16    | 3363.08 (3155.83 to 3582.42)    | 14.09 (13.33 to 14.86) | 0.42    | 165.58 (156.59 to 174.63)    |
|           | Ischemic heart disease     | 198.52 (185.53 to 214.83)    | 0.11    | 2332.25 (2179.60 to 2523.87)    | 10.24 (9.61 to 11.03)  | 0.31    | 120.30 (112.90 to 129.53)    |
| Lesotho   | Stroke                     | 47.25 (41.67 to 53.78)       | 0.03    | 555.09 (489.54 to 631.77)       | 2.13 (1.89 to 2.45)    | 0.06    | 25.01 (22.15 to 28.73)       |
|           | Ischemic stroke            | 31.06 (26.85 to 36.23)       | 0.02    | 364.88 (315.40 to 425.67)       | 1.54 (1.33 to 1.82)    | 0.05    | 18.12 (15.58 to 21.43)       |
|           | Hypertensive heart disease | 16.54 (7.87 to 22.50)        | 0.01    | 194.29 (92.45 to 264.31)        | 0.93 (0.38 to 1.37)    | 0.03    | 10.94 (4.50 to 16.07)        |
|           | All causes                 | 1310.74 (1170.38 to 1455.36) | 1.00    | 67300.93 (60094.37 to 74726.49) | 25.22 (22.25 to 28.05) | 1.00    | 1294.78 (1142.21 to 1440.36) |
|           | Non-communicable diseases  | 414.35 (356.37 to 472.91)    | 0.32    | 21274.89 (18298.27 to 24281.85) | 9.87 (8.29 to 11.40)   | 0.39    | 506.53 (425.44 to 585.26)    |
|           | Cardiovascular diseases    | 95.83 (78.82 to 112.74)      | 0.07    | 4920.38 (4047.31 to 5788.93)    | 4.01 (3.28 to 4.72)    | 0.16    | 205.75 (168.66 to 242.13)    |
|           | Ischemic heart disease     | 32.30 (26.18 to 39.62)       | 0.02    | 1658.61 (1344.19 to 2034.30)    | 1.43 (1.14 to 1.74)    | 0.06    | 73.40 (58.74 to 89.20)       |
|           | Stroke                     | 39.55 (31.68 to 47.65)       | 0.03    | 2030.72 (1626.85 to 2446.81)    | 1.71 (1.37 to 2.08)    | 0.07    | 87.90 (70.31 to 106.62)      |
|           | Ischemic stroke            | 9.28 (7.10 to 11.53)         | 0.01    | 476.50 (364.34 to 592.24)       | 0.47 (0.36 to 0.60)    | 0.02    | 24.38 (18.25 to 30.98)       |
|           | Hypertensive heart disease | 9.42 (6.30 to 12.60)         | 0.01    | 483.84 (323.62 to 647.05)       | 0.42 (0.29 to 0.56)    | 0.02    | 21.67 (14.75 to 28.69)       |
| Liberia   | All causes                 | 2162.10 (1869.11 to 2484.27) | 1.00    | 45781.67 (39577.68 to 52603.49) | 31.20 (27.77 to 35.14) | 1.00    | 660.62 (587.97 to 744.01)    |
|           | Non-communicable diseases  | 690.03 (589.07 to 803.12)    | 0.32    | 14611.13 (12473.42 to 17005.78) | 11.51 (10.03 to 13.15) | 0.37    | 243.68 (212.34 to 278.43)    |
|           | Cardiovascular diseases    | 117.45 (101.41 to 133.89)    | 0.05    | 2487.05 (2147.25 to 2834.96)    | 4.41 (3.81 to 5.05)    | 0.14    | 93.47 (80.59 to 107.00)      |
|           | Ischemic heart disease     | 50.41 (42.38 to 58.76)       | 0.02    | 1067.45 (897.41 to 1244.27)     | 2.17 (1.84 to 2.52)    | 0.07    | 45.94 (38.94 to 53.29)       |
|           | Stroke                     | 41.29 (35.25 to 47.84)       | 0.02    | 874.34 (746.50 to 1012.93)      | 1.54 (1.31 to 1.79)    | 0.05    | 32.58 (27.75 to 37.91)       |
|           | Ischemic stroke            | 11.71 (9.87 to 13.74)        | 0.01    | 248.01 (209.00 to 291.04)       | 0.51 (0.43 to 0.61)    | 0.02    | 10.80 (9.01 to 12.88)        |
|           | Hypertensive heart disease | 4.66 (2.68 to 6.96)          | 0.00    | 98.60 (56.73 to 147.39)         | 0.18 (0.10 to 0.26)    | 0.01    | 3.73 (2.19 to 5.52)          |
|           | All causes                 | 1908.75 (1672.87 to 2151.57) | 1.00    | 27628.01 (24213.82 to 31142.70) | 34.46 (31.02 to 38.11) | 1.00    | 498.73 (449.05 to 551.67)    |
|           | Non-communicable diseases  | 1378.92 (1180.88 to 1579.32) | 0.72    | 19959.04 (17092.51 to 22859.77) | 26.85 (23.79 to 30.05) | 0.78    | 388.68 (344.41 to 434.99)    |
|           | Cardiovascular diseases    | 340.73 (303.30 to 382.86)    | 0.18    | 4931.85 (4390.16 to 5541.66)    | 13.33 (11.92 to 14.95) | 0.39    | 193.01 (172.53 to 216.39)    |
| Libya     | Ischemic heart disease     | 216.81 (185.43 to 250.22)    | 0.11    | 3138.19 (2684.01 to 3621.80)    | 9.18 (7.99 to 10.38)   | 0.27    | 132.87 (115.62 to 150.24)    |
|           | Stroke                     | 73.13 (57.52 to 87.90)       | 0.04    | 1058.52 (832.55 to 1272.24)     | 2.70 (2.11 to 3.28)    | 0.08    | 39.12 (30.52 to 47.46)       |
|           | Ischemic stroke            | 40.34 (33.30 to 48.55)       | 0.02    | 583.85 (481.96 to 702.73)       | 1.73 (1.37 to 2.11)    | 0.05    | 25.08 (19.89 to 30.52)       |
|           | Hypertensive heart disease | 14.22 (6.43 to 19.32)        | 0.01    | 205.84 (93.14 to 279.68)        | 0.68 (0.28 to 0.97)    | 0.02    | 9.84 (4.05 to 14.08)         |

**Table 3S National and regional disability-adjusted life years (DALYs) and deaths of non-communicable and cardiovascular diseases for 195 countries according to the GBD 2017 study.**

| Countries  | Cause                      | DALYs                           |         |                                 | Deaths                    |         |                              |
|------------|----------------------------|---------------------------------|---------|---------------------------------|---------------------------|---------|------------------------------|
|            |                            | Number (thousand)               | Percent | Rate                            | Number (thousand)         | Percent | Rate                         |
|            |                            | Mean (95% UI)                   | Mean    | Mean (95% UI)                   | Mean (95% UI)             | Mean    | Mean (95% UI)                |
| Lithuania  | All causes                 | 1171.79 (1055.97 to 1297.73)    | 1.00    | 41149.50 (37082.10 to 45572.10) | 40.90 (38.97 to 42.86)    | 1.00    | 1436.23 (1368.62 to 1505.03) |
|            | Non-communicable diseases  | 954.39 (861.56 to 1057.26)      | 0.81    | 33514.88 (30255.16 to 37127.66) | 36.88 (35.18 to 38.57)    | 0.90    | 1295.13 (1235.28 to 1354.48) |
|            | Cardiovascular diseases    | 343.13 (325.26 to 361.56)       | 0.29    | 12049.73 (11422.15 to 12696.67) | 22.25 (21.18 to 23.37)    | 0.54    | 781.39 (743.90 to 820.61)    |
|            | Ischemic heart disease     | 206.68 (195.63 to 219.09)       | 0.18    | 7258.01 (6870.03 to 7693.75)    | 15.37 (14.57 to 16.22)    | 0.38    | 539.58 (511.78 to 569.49)    |
|            | Stroke                     | 89.03 (81.65 to 96.03)          | 0.08    | 3126.53 (2867.38 to 3372.24)    | 4.92 (4.64 to 5.24)       | 0.12    | 172.94 (162.83 to 184.00)    |
|            | Ischemic stroke            | 65.60 (59.61 to 71.33)          | 0.06    | 2303.55 (2093.31 to 2504.89)    | 3.78 (3.55 to 4.02)       | 0.09    | 132.74 (124.56 to 141.05)    |
|            | Hypertensive heart disease | 8.02 (4.23 to 9.12)             | 0.01    | 281.75 (148.61 to 320.22)       | 0.45 (0.22 to 0.51)       | 0.01    | 15.66 (7.86 to 17.85)        |
| Luxembourg | All causes                 | 149.52 (128.61 to 173.57)       | 1.00    | 25319.30 (21777.96 to 29391.51) | 4.42 (4.12 to 4.73)       | 1.00    | 747.95 (697.02 to 800.43)    |
|            | Non-communicable diseases  | 129.29 (110.86 to 150.50)       | 0.86    | 21892.51 (18771.77 to 25484.24) | 3.98 (3.71 to 4.26)       | 0.90    | 673.31 (627.83 to 720.92)    |
|            | Cardiovascular diseases    | 21.06 (19.12 to 23.19)          | 0.14    | 3566.41 (3238.39 to 3926.35)    | 1.40 (1.27 to 1.52)       | 0.32    | 236.56 (215.67 to 257.45)    |
|            | Ischemic heart disease     | 8.57 (7.69 to 9.51)             | 0.06    | 1450.52 (1302.08 to 1610.60)    | 0.66 (0.59 to 0.73)       | 0.15    | 111.32 (100.00 to 123.05)    |
|            | Stroke                     | 5.00 (4.45 to 5.55)             | 0.03    | 846.25 (753.71 to 939.96)       | 0.33 (0.30 to 0.37)       | 0.08    | 56.25 (49.96 to 63.23)       |
|            | Ischemic stroke            | 2.47 (2.15 to 2.79)             | 0.02    | 418.05 (363.61 to 472.30)       | 0.16 (0.14 to 0.18)       | 0.04    | 27.59 (24.33 to 31.11)       |
|            | Hypertensive heart disease | 0.51 (0.39 to 0.66)             | 0.00    | 87.12 (65.95 to 111.98)         | 0.04 (0.02 to 0.05)       | 0.01    | 7.16 (4.17 to 8.59)          |
| Macedonia  | All causes                 | 670.48 (595.91 to 753.69)       | 1.00    | 30829.17 (27400.46 to 34655.09) | 19.11 (18.28 to 19.95)    | 1.00    | 878.74 (840.61 to 917.30)    |
|            | Non-communicable diseases  | 566.52 (507.59 to 632.93)       | 0.85    | 26049.17 (23339.14 to 29102.70) | 18.12 (17.33 to 18.92)    | 0.95    | 832.96 (796.80 to 869.91)    |
|            | Cardiovascular diseases    | 193.73 (183.13 to 204.65)       | 0.29    | 8907.67 (8420.60 to 9409.96)    | 10.52 (10.02 to 11.02)    | 0.55    | 483.62 (460.69 to 506.64)    |
|            | Ischemic heart disease     | 75.49 (69.81 to 81.48)          | 0.11    | 3471.23 (3209.94 to 3746.67)    | 4.10 (3.82 to 4.38)       | 0.21    | 188.39 (175.84 to 201.36)    |
|            | Stroke                     | 88.52 (82.66 to 94.74)          | 0.13    | 4070.00 (3800.84 to 4356.19)    | 4.93 (4.61 to 5.27)       | 0.26    | 226.47 (212.10 to 242.32)    |
|            | Ischemic stroke            | 40.93 (37.56 to 44.43)          | 0.06    | 1881.80 (1727.05 to 2043.08)    | 2.41 (2.24 to 2.61)       | 0.13    | 110.88 (102.91 to 119.86)    |
|            | Hypertensive heart disease | 9.59 (7.33 to 11.17)            | 0.01    | 441.07 (336.90 to 513.71)       | 0.65 (0.45 to 0.76)       | 0.03    | 29.79 (20.53 to 35.12)       |
| Madagascar | All causes                 | 12671.68 (10858.96 to 14876.92) | 1.00    | 48534.17 (41591.21 to 56980.51) | 184.89 (161.14 to 212.99) | 1.00    | 708.15 (617.20 to 815.77)    |
|            | Non-communicable diseases  | 4230.85 (3635.66 to 4911.28)    | 0.33    | 16204.70 (13925.03 to 18810.85) | 73.77 (63.59 to 85.40)    | 0.40    | 282.55 (243.54 to 327.08)    |
|            | Cardiovascular diseases    | 1022.72 (870.60 to 1194.99)     | 0.08    | 3917.16 (3334.52 to 4576.97)    | 34.53 (29.45 to 40.32)    | 0.19    | 132.24 (112.79 to 154.43)    |
|            | Ischemic heart disease     | 280.68 (232.91 to 336.12)       | 0.02    | 1075.04 (892.08 to 1287.40)     | 10.62 (8.90 to 12.68)     | 0.06    | 40.69 (34.09 to 48.56)       |
|            | Stroke                     | 456.16 (380.65 to 543.33)       | 0.04    | 1747.17 (1457.94 to 2081.04)    | 15.87 (13.22 to 18.78)    | 0.09    | 60.78 (50.63 to 71.94)       |
|            | Ischemic stroke            | 102.10 (79.56 to 131.17)        | 0.01    | 391.06 (304.71 to 502.40)       | 4.23 (3.23 to 5.48)       | 0.02    | 16.19 (12.38 to 20.98)       |
|            | Hypertensive heart disease | 91.97 (46.59 to 137.36)         | 0.01    | 352.27 (178.43 to 526.12)       | 3.61 (1.82 to 5.61)       | 0.02    | 13.82 (6.96 to 21.49)        |
| Malawi     | All causes                 | 8275.47 (7426.12 to 9338.16)    | 1.00    | 48137.77 (43197.20 to 54319.39) | 129.41 (118.98 to 142.09) | 1.00    | 752.80 (692.09 to 826.51)    |
|            | Non-communicable diseases  | 2556.87 (2220.29 to 2934.31)    | 0.31    | 14873.11 (12915.23 to 17068.69) | 46.57 (41.64 to 51.44)    | 0.36    | 270.91 (242.22 to 299.21)    |
|            | Cardiovascular diseases    | 368.71 (327.89 to 410.83)       | 0.04    | 2144.76 (1907.31 to 2389.75)    | 15.01 (13.35 to 16.71)    | 0.12    | 87.29 (77.67 to 97.21)       |
|            | Ischemic heart disease     | 155.29 (133.96 to 178.17)       | 0.02    | 903.32 (779.25 to 1036.42)      | 6.83 (5.92 to 7.80)       | 0.05    | 39.70 (34.43 to 45.37)       |
|            | Stroke                     | 121.64 (106.60 to 137.61)       | 0.01    | 707.56 (620.10 to 800.46)       | 5.20 (4.50 to 5.94)       | 0.04    | 30.23 (26.15 to 34.53)       |
|            | Ischemic stroke            | 41.47 (31.88 to 51.17)          | 0.01    | 241.25 (185.43 to 297.67)       | 2.05 (1.52 to 2.55)       | 0.02    | 11.95 (8.83 to 14.85)        |
|            | Hypertensive heart disease | 29.56 (15.43 to 50.31)          | 0.00    | 171.94 (89.76 to 292.67)        | 1.52 (0.78 to 2.69)       | 0.01    | 8.85 (4.54 to 15.64)         |

**Table 3S National and regional disability-adjusted life years (DALYs) and deaths of non-communicable and cardiovascular diseases for 195 countries according to the GBD 2017 study.**

| Countries        | Cause                      | DALYs                           |         |                                 | Deaths                    |         |                            |
|------------------|----------------------------|---------------------------------|---------|---------------------------------|---------------------------|---------|----------------------------|
|                  |                            | Number (thousand)               | Percent | Rate                            | Number (thousand)         | Percent | Rate                       |
|                  |                            | Mean (95% UI)                   | Mean    | Mean (95% UI)                   | Mean (95% UI)             | Mean    | Mean (95% UI)              |
| Malaysia         | All causes                 | 7124.79 (6352.11 to 7978.67)    | 1.00    | 23253.37 (20731.54 to 26040.19) | 165.13 (154.45 to 176.85) | 1.00    | 538.95 (504.07 to 577.20)  |
|                  | Non-communicable diseases  | 5158.86 (4499.22 to 5880.02)    | 0.72    | 16837.12 (14684.23 to 19190.76) | 118.71 (109.97 to 128.82) | 0.72    | 387.44 (358.90 to 420.44)  |
|                  | Cardiovascular diseases    | 1397.31 (1288.03 to 1520.98)    | 0.20    | 4560.44 (4203.78 to 4964.06)    | 57.29 (52.96 to 62.52)    | 0.35    | 186.97 (172.84 to 204.05)  |
|                  | Ischemic heart disease     | 758.17 (691.27 to 834.23)       | 0.11    | 2474.45 (2256.11 to 2722.70)    | 33.40 (30.67 to 36.62)    | 0.20    | 109.00 (100.11 to 119.53)  |
|                  | Stroke                     | 426.90 (388.95 to 469.98)       | 0.06    | 1393.30 (1269.43 to 1533.87)    | 17.75 (16.12 to 19.54)    | 0.11    | 57.94 (52.62 to 63.76)     |
|                  | Ischemic stroke            | 159.07 (141.56 to 177.38)       | 0.02    | 519.16 (462.02 to 578.91)       | 7.05 (6.29 to 7.83)       | 0.04    | 23.01 (20.52 to 25.57)     |
|                  | Hypertensive heart disease | 13.57 (11.73 to 17.74)          | 0.00    | 44.30 (38.28 to 57.89)          | 0.51 (0.43 to 0.76)       | 0.00    | 1.67 (1.41 to 2.48)        |
| Maldives         | All causes                 | 70.32 (59.69 to 82.64)          | 1.00    | 15334.39 (13016.64 to 18020.60) | 1.15 (1.10 to 1.21)       | 1.00    | 250.63 (238.88 to 263.11)  |
|                  | Non-communicable diseases  | 55.49 (46.57 to 66.06)          | 0.79    | 12100.88 (10155.03 to 14405.43) | 0.95 (0.91 to 1.00)       | 0.83    | 208.15 (197.45 to 219.03)  |
|                  | Cardiovascular diseases    | 9.49 (8.71 to 10.15)            | 0.14    | 2069.83 (1898.82 to 2213.94)    | 0.42 (0.39 to 0.45)       | 0.37    | 92.02 (86.07 to 97.93)     |
|                  | Ischemic heart disease     | 5.38 (4.92 to 5.79)             | 0.08    | 1173.90 (1073.33 to 1263.02)    | 0.26 (0.24 to 0.28)       | 0.23    | 57.46 (53.23 to 61.59)     |
|                  | Stroke                     | 2.52 (2.26 to 2.77)             | 0.04    | 550.07 (493.27 to 603.97)       | 0.10 (0.09 to 0.11)       | 0.09    | 22.46 (20.44 to 24.43)     |
|                  | Ischemic stroke            | 0.96 (0.84 to 1.09)             | 0.01    | 210.07 (182.51 to 237.06)       | 0.04 (0.04 to 0.05)       | 0.04    | 8.95 (8.06 to 9.89)        |
|                  | Hypertensive heart disease | 0.34 (0.29 to 0.39)             | 0.00    | 73.35 (62.93 to 84.17)          | 0.02 (0.01 to 0.02)       | 0.01    | 3.66 (3.11 to 4.26)        |
| Mali             | All causes                 | 13994.42 (12135.29 to 16260.34) | 1.00    | 69095.54 (59916.34 to 80283.18) | 186.24 (164.66 to 212.95) | 1.00    | 919.54 (812.99 to 1051.41) |
|                  | Non-communicable diseases  | 3386.05 (2939.28 to 3828.03)    | 0.24    | 16718.14 (14512.29 to 18900.38) | 55.21 (48.32 to 61.90)    | 0.30    | 272.60 (238.56 to 305.62)  |
|                  | Cardiovascular diseases    | 507.03 (443.39 to 571.12)       | 0.04    | 2503.41 (2189.16 to 2819.84)    | 18.04 (15.72 to 20.42)    | 0.10    | 89.05 (77.63 to 100.83)    |
|                  | Ischemic heart disease     | 155.17 (129.13 to 184.41)       | 0.01    | 766.12 (637.58 to 910.50)       | 7.14 (6.01 to 8.41)       | 0.04    | 35.25 (29.69 to 41.51)     |
|                  | Stroke                     | 199.80 (168.43 to 238.27)       | 0.01    | 986.49 (831.60 to 1176.45)      | 7.20 (6.02 to 8.66)       | 0.04    | 35.54 (29.74 to 42.74)     |
|                  | Ischemic stroke            | 56.96 (45.28 to 69.24)          | 0.00    | 281.24 (223.59 to 341.86)       | 2.45 (1.92 to 3.04)       | 0.01    | 12.09 (9.49 to 15.00)      |
|                  | Hypertensive heart disease | 20.98 (11.80 to 31.51)          | 0.00    | 103.60 (58.25 to 155.56)        | 0.82 (0.46 to 1.21)       | 0.00    | 4.03 (2.28 to 5.99)        |
| Malta            | All causes                 | 122.20 (107.21 to 140.12)       | 1.00    | 28125.93 (24676.57 to 32249.51) | 3.99 (3.84 to 4.14)       | 1.00    | 918.63 (883.66 to 953.85)  |
|                  | Non-communicable diseases  | 107.53 (94.60 to 122.68)        | 0.88    | 24750.53 (21774.15 to 28235.80) | 3.65 (3.51 to 3.79)       | 0.91    | 840.45 (807.86 to 872.71)  |
|                  | Cardiovascular diseases    | 23.50 (22.29 to 24.75)          | 0.19    | 5408.03 (5131.17 to 5696.31)    | 1.57 (1.50 to 1.63)       | 0.39    | 361.03 (346.17 to 376.25)  |
|                  | Ischemic heart disease     | 13.58 (12.91 to 14.26)          | 0.11    | 3126.45 (2971.44 to 3281.21)    | 0.97 (0.93 to 1.02)       | 0.24    | 223.27 (212.98 to 233.74)  |
|                  | Stroke                     | 5.15 (4.78 to 5.53)             | 0.04    | 1184.75 (1099.17 to 1272.69)    | 0.34 (0.32 to 0.36)       | 0.08    | 77.13 (72.58 to 81.88)     |
|                  | Ischemic stroke            | 2.63 (2.38 to 2.89)             | 0.02    | 606.02 (547.15 to 664.07)       | 0.18 (0.17 to 0.19)       | 0.04    | 41.14 (38.31 to 44.04)     |
|                  | Hypertensive heart disease | 0.61 (0.49 to 0.71)             | 0.01    | 141.28 (113.86 to 163.32)       | 0.04 (0.03 to 0.05)       | 0.01    | 10.00 (6.63 to 11.33)      |
| Marshall Islands | All causes                 | 21.29 (18.92 to 23.65)          | 1.00    | 37806.23 (33600.99 to 42000.02) | 0.42 (0.37 to 0.46)       | 1.00    | 737.09 (658.28 to 822.15)  |
|                  | Non-communicable diseases  | 14.67 (12.95 to 16.48)          | 0.69    | 26055.07 (23000.62 to 29260.47) | 0.32 (0.28 to 0.35)       | 0.76    | 562.10 (500.59 to 629.67)  |
|                  | Cardiovascular diseases    | 4.87 (4.26 to 5.56)             | 0.23    | 8655.84 (7561.59 to 9872.51)    | 0.15 (0.14 to 0.17)       | 0.37    | 271.89 (239.74 to 309.27)  |
|                  | Ischemic heart disease     | 2.14 (1.82 to 2.52)             | 0.10    | 3803.25 (3234.51 to 4480.22)    | 0.07 (0.06 to 0.08)       | 0.17    | 127.38 (110.07 to 147.42)  |
|                  | Stroke                     | 1.71 (1.46 to 2.01)             | 0.08    | 3039.87 (2597.04 to 3574.98)    | 0.05 (0.05 to 0.06)       | 0.13    | 95.48 (82.45 to 111.76)    |
|                  | Ischemic stroke            | 0.35 (0.30 to 0.42)             | 0.02    | 623.19 (524.07 to 751.93)       | 0.01 (0.01 to 0.01)       | 0.03    | 21.93 (18.26 to 26.48)     |
|                  | Hypertensive heart disease | 0.25 (0.15 to 0.32)             | 0.01    | 437.06 (270.89 to 568.75)       | 0.01 (0.01 to 0.01)       | 0.02    | 14.68 (9.24 to 18.92)      |
| Mauritania       | All causes                 | 1231.89 (1083.28 to 1415.77)    | 1.00    | 31474.58 (27677.60 to 36172.61) | 20.05 (17.92 to 22.19)    | 1.00    | 512.27 (457.95 to 566.90)  |

**Table 3S National and regional disability-adjusted life years (DALYs) and deaths of non-communicable and cardiovascular diseases for 195 countries according to the GBD 2017 study.**

| Countries | Cause                      | DALYs                           |                           |                                 | Deaths                          |                     |                              |                            |
|-----------|----------------------------|---------------------------------|---------------------------|---------------------------------|---------------------------------|---------------------|------------------------------|----------------------------|
|           |                            | Number (thousand)               | Percent                   | Rate                            | Number (thousand)               | Percent             | Rate                         |                            |
|           |                            | Mean (95% UI)                   | Mean                      | Mean (95% UI)                   | Mean (95% UI)                   | Mean                | Mean (95% UI)                |                            |
| Mauritius | Non-communicable diseases  | 546.93 (470.01 to 638.16)       | 0.44                      | 13973.87 (12008.70 to 16304.80) | 10.35 (9.03 to 11.67)           | 0.52                | 264.42 (230.62 to 298.17)    |                            |
|           | Cardiovascular diseases    | 92.12 (79.95 to 105.38)         | 0.07                      | 2353.72 (2042.65 to 2692.39)    | 3.92 (3.39 to 4.50)             | 0.20                | 100.26 (86.71 to 114.86)     |                            |
|           | Ischemic heart disease     | 39.40 (32.95 to 46.32)          | 0.03                      | 1006.75 (841.83 to 1183.50)     | 1.93 (1.64 to 2.25)             | 0.10                | 49.21 (41.82 to 57.36)       |                            |
|           | Stroke                     | 31.87 (27.07 to 37.01)          | 0.03                      | 814.15 (691.65 to 945.49)       | 1.34 (1.13 to 1.57)             | 0.07                | 34.22 (28.82 to 40.04)       |                            |
|           | Ischemic stroke            | 11.71 (9.47 to 13.94)           | 0.01                      | 299.08 (241.90 to 356.19)       | 0.55 (0.44 to 0.66)             | 0.03                | 13.96 (11.22 to 16.86)       |                            |
|           | Hypertensive heart disease | 3.75 (2.15 to 5.74)             | 0.00                      | 95.90 (55.01 to 146.72)         | 0.16 (0.09 to 0.24)             | 0.01                | 4.01 (2.22 to 6.10)          |                            |
|           | All causes                 | 402.56 (361.11 to 449.23)       | 1.00                      | 31645.39 (28386.28 to 35313.39) | 10.33 (9.80 to 10.88)           | 1.00                | 812.24 (770.00 to 855.49)    |                            |
|           | Non-communicable diseases  | 333.71 (298.41 to 372.99)       | 0.83                      | 26233.01 (23457.71 to 29320.82) | 9.19 (8.72 to 9.69)             | 0.89                | 722.57 (685.12 to 761.86)    |                            |
|           | Cardiovascular diseases    | 71.73 (67.23 to 76.22)          | 0.18                      | 5639.04 (5284.76 to 5991.72)    | 3.31 (3.13 to 3.50)             | 0.32                | 260.17 (245.88 to 275.11)    |                            |
|           | Ischemic heart disease     | 35.28 (32.73 to 37.85)          | 0.09                      | 2773.60 (2572.78 to 2975.38)    | 1.74 (1.62 to 1.85)             | 0.17                | 136.73 (127.42 to 145.78)    |                            |
| Mexico    | Stroke                     | 22.87 (21.23 to 24.54)          | 0.06                      | 1797.72 (1669.18 to 1928.69)    | 1.00 (0.94 to 1.08)             | 0.10                | 78.89 (73.88 to 84.64)       |                            |
|           | Ischemic stroke            | 8.25 (7.43 to 9.11)             | 0.02                      | 648.76 (583.90 to 716.00)       | 0.40 (0.37 to 0.43)             | 0.04                | 31.33 (29.05 to 33.92)       |                            |
|           | Hypertensive heart disease | 6.29 (4.96 to 7.11)             | 0.02                      | 494.66 (389.54 to 558.78)       | 0.34 (0.24 to 0.38)             | 0.03                | 26.59 (18.70 to 29.76)       |                            |
|           | All causes                 | 31970.78 (28926.67 to 35394.45) | 1.00                      | 25259.42 (22854.34 to 27964.39) | 711.32 (703.47 to 718.77)       | 1.00                | 562.00 (555.80 to 567.88)    |                            |
|           | Non-communicable diseases  | 22759.45 (20173.35 to 25791.92) | 0.71                      | 17981.75 (15938.53 to 20377.64) | 560.04 (552.90 to 566.76)       | 0.79                | 442.48 (436.84 to 447.79)    |                            |
|           | Cardiovascular diseases    | 3280.17 (3155.91 to 3424.66)    | 0.10                      | 2591.59 (2493.41 to 2705.75)    | 161.78 (158.67 to 165.26)       | 0.23                | 127.82 (125.36 to 130.57)    |                            |
|           | Ischemic heart disease     | 1841.67 (1778.62 to 1907.83)    | 0.06                      | 1455.06 (1405.25 to 1507.34)    | 101.35 (97.66 to 104.44)        | 0.14                | 80.07 (77.16 to 82.52)       |                            |
|           | Stroke                     | 785.04 (753.29 to 819.02)       | 0.02                      | 620.24 (595.16 to 647.09)       | 36.65 (35.28 to 37.67)          | 0.05                | 28.96 (27.88 to 29.76)       |                            |
|           | Ischemic stroke            | 268.15 (247.07 to 288.97)       | 0.01                      | 211.86 (195.21 to 228.31)       | 14.89 (14.25 to 15.41)          | 0.02                | 11.77 (11.26 to 12.18)       |                            |
|           | Hypertensive heart disease | 157.93 (140.10 to 205.94)       | 0.00                      | 124.77 (110.69 to 162.71)       | 9.07 (7.51 to 12.00)            | 0.01                | 7.17 (5.93 to 9.48)          |                            |
| Moldova   | All causes                 | 1447.48 (1320.69 to 1591.93)    | 1.00                      | 38891.64 (35485.13 to 42772.80) | 41.80 (40.83 to 42.71)          | 1.00                | 1123.22 (1097.04 to 1147.64) |                            |
|           | Non-communicable diseases  | 1162.88 (1060.60 to 1280.92)    | 0.80                      | 31244.92 (28496.74 to 34416.55) | 37.41 (36.56 to 38.26)          | 0.89                | 1005.14 (982.19 to 1028.03)  |                            |
|           | Cardiovascular diseases    | 419.29 (406.53 to 432.18)       | 0.29                      | 11265.75 (10922.93 to 11612.16) | 23.19 (22.61 to 23.80)          | 0.55                | 623.18 (607.50 to 639.53)    |                            |
|           | Ischemic heart disease     | 249.42 (239.85 to 266.02)       | 0.17                      | 6701.52 (6444.44 to 7147.58)    | 15.22 (14.67 to 16.28)          | 0.36                | 408.86 (394.06 to 437.41)    |                            |
|           | Stroke                     | 121.86 (115.04 to 130.02)       | 0.08                      | 3274.11 (3090.92 to 3493.34)    | 5.77 (5.50 to 6.19)             | 0.14                | 155.15 (147.71 to 166.37)    |                            |
|           | Ischemic stroke            | 57.83 (53.40 to 62.44)          | 0.04                      | 1553.86 (1434.73 to 1677.73)    | 2.82 (2.66 to 3.03)             | 0.07                | 75.65 (71.42 to 81.34)       |                            |
|           | Hypertensive heart disease | 21.35 (6.34 to 25.11)           | 0.01                      | 573.52 (170.40 to 674.78)       | 1.35 (0.28 to 1.61)             | 0.03                | 36.22 (7.65 to 43.30)        |                            |
|           | All causes                 | 1087.76 (982.22 to 1200.75)     | 1.00                      | 33454.82 (30208.92 to 36929.90) | 21.21 (19.67 to 22.82)          | 1.00                | 652.33 (605.12 to 701.92)    |                            |
|           | Non-communicable diseases  | 716.57 (640.10 to 797.48)       | 0.66                      | 22038.78 (19686.62 to 24527.11) | 16.59 (15.38 to 17.87)          | 0.78                | 510.30 (473.12 to 549.47)    |                            |
|           | Cardiovascular diseases    | 205.36 (188.20 to 224.00)       | 0.19                      | 6316.03 (5788.26 to 6889.21)    | 7.77 (7.15 to 8.46)             | 0.37                | 238.97 (219.97 to 260.17)    |                            |
| Mongolia  | Ischemic heart disease     | 91.56 (83.27 to 100.68)         | 0.08                      | 2816.06 (2561.18 to 3096.57)    | 3.88 (3.54 to 4.24)             | 0.18                | 119.29 (108.94 to 130.49)    |                            |
|           | Stroke                     | 92.10 (84.19 to 100.90)         | 0.08                      | 2832.75 (2589.33 to 3103.34)    | 3.27 (2.98 to 3.59)             | 0.15                | 100.55 (91.69 to 110.26)     |                            |
|           | Ischemic stroke            | 9.30 (8.16 to 10.51)            | 0.01                      | 285.90 (250.87 to 323.11)       | 0.26 (0.24 to 0.29)             | 0.01                | 8.12 (7.32 to 9.03)          |                            |
|           | Hypertensive heart disease | 4.02 (3.39 to 4.62)             | 0.00                      | 123.63 (104.14 to 142.09)       | 0.15 (0.13 to 0.18)             | 0.01                | 4.69 (3.93 to 5.47)          |                            |
|           | All causes                 | 201.46 (179.93 to 227.12)       | 1.00                      | 32166.37 (28728.39 to 36262.05) | 6.50 (6.11 to 6.94)             | 1.00                | 1038.18 (975.08 to 1108.32)  |                            |
|           | Non-communicable diseases  | 171.56 (153.99 to 192.34)       | 0.85                      | 27392.48 (24586.12 to 30709.13) | 6.14 (5.77 to 6.56)             | 0.94                | 980.13 (921.14 to 1047.25)   |                            |
|           | Montenegro                 | Non-communicable diseases       | 171.56 (153.99 to 192.34) | 0.85                            | 27392.48 (24586.12 to 30709.13) | 6.14 (5.77 to 6.56) | 0.94                         | 980.13 (921.14 to 1047.25) |



**Table 3S National and regional disability-adjusted life years (DALYs) and deaths of non-communicable and cardiovascular diseases for 195 countries according to the GBD 2017 study.**

| Countries  | Cause                      | DALYs                           |         |                                 | Deaths                    |         |                           |
|------------|----------------------------|---------------------------------|---------|---------------------------------|---------------------------|---------|---------------------------|
|            |                            | Number (thousand)               | Percent | Rate                            | Number (thousand)         | Percent | Rate                      |
|            |                            | Mean (95% UI)                   | Mean    | Mean (95% UI)                   | Mean (95% UI)             | Mean    | Mean (95% UI)             |
| Morocco    | Cardiovascular diseases    | 63.29 (59.14 to 67.92)          | 0.31    | 10105.17 (9442.02 to 10844.43)  | 3.74 (3.52 to 3.98)       | 0.57    | 596.73 (561.41 to 635.09) |
|            | Ischemic heart disease     | 24.90 (22.97 to 27.16)          | 0.12    | 3974.94 (3666.97 to 4336.24)    | 1.45 (1.34 to 1.57)       | 0.22    | 230.95 (214.02 to 250.23) |
|            | Stroke                     | 28.61 (26.53 to 30.82)          | 0.14    | 4567.63 (4236.43 to 4920.17)    | 1.80 (1.67 to 1.93)       | 0.28    | 286.92 (267.15 to 308.24) |
|            | Ischemic stroke            | 5.91 (5.28 to 6.61)             | 0.03    | 943.49 (842.96 to 1054.58)      | 0.32 (0.29 to 0.35)       | 0.05    | 50.83 (45.68 to 56.64)    |
|            | Hypertensive heart disease | 0.33 (0.28 to 0.38)             | 0.00    | 52.60 (44.96 to 60.86)          | 0.02 (0.02 to 0.02)       | 0.00    | 3.30 (2.52 to 3.88)       |
|            | All causes                 | 10345.39 (8996.07 to 11846.88)  | 1.00    | 29151.04 (25348.95 to 33381.91) | 220.71 (191.72 to 251.07) | 1.00    | 621.92 (540.23 to 707.46) |
|            | Non-communicable diseases  | 7846.07 (6709.86 to 9019.16)    | 0.76    | 22108.52 (18906.93 to 25414.03) | 183.54 (159.24 to 209.70) | 0.83    | 517.17 (448.71 to 590.89) |
|            | Cardiovascular diseases    | 2462.67 (2131.04 to 2809.15)    | 0.24    | 6939.26 (6004.80 to 7915.57)    | 115.12 (99.55 to 131.42)  | 0.52    | 324.39 (280.50 to 370.32) |
| Mozambique | Ischemic heart disease     | 1562.97 (1324.94 to 1821.59)    | 0.15    | 4404.10 (3733.40 to 5132.84)    | 76.24 (65.40 to 88.13)    | 0.35    | 214.84 (184.28 to 248.33) |
|            | Stroke                     | 601.31 (493.96 to 712.61)       | 0.06    | 1694.37 (1391.88 to 2007.97)    | 27.15 (21.95 to 32.50)    | 0.12    | 76.51 (61.84 to 91.56)    |
|            | Ischemic stroke            | 348.63 (293.20 to 409.37)       | 0.03    | 982.36 (826.17 to 1153.52)      | 17.72 (14.50 to 21.18)    | 0.08    | 49.92 (40.85 to 59.69)    |
|            | Hypertensive heart disease | 124.06 (56.17 to 159.18)        | 0.01    | 349.58 (158.27 to 448.54)       | 6.55 (2.71 to 8.69)       | 0.03    | 18.46 (7.64 to 24.49)     |
|            | All causes                 | 16947.93 (15093.68 to 19110.05) | 1.00    | 56426.69 (50253.14 to 63625.29) | 256.85 (232.53 to 286.08) | 1.00    | 855.16 (774.19 to 952.47) |
|            | Non-communicable diseases  | 4618.67 (4011.28 to 5236.96)    | 0.27    | 15377.48 (13355.23 to 17436.01) | 79.40 (69.90 to 89.01)    | 0.31    | 264.35 (232.72 to 296.35) |
|            | Cardiovascular diseases    | 825.54 (723.33 to 929.40)       | 0.05    | 2748.56 (2408.28 to 3094.36)    | 29.83 (26.05 to 33.76)    | 0.12    | 99.33 (86.72 to 112.39)   |
|            | Ischemic heart disease     | 249.24 (215.46 to 287.76)       | 0.01    | 829.81 (717.34 to 958.08)       | 9.69 (8.35 to 11.15)      | 0.04    | 32.25 (27.81 to 37.14)    |
| Myanmar    | Stroke                     | 381.82 (329.62 to 440.78)       | 0.02    | 1271.22 (1097.45 to 1467.55)    | 14.32 (12.25 to 16.57)    | 0.06    | 47.69 (40.80 to 55.15)    |
|            | Ischemic stroke            | 101.36 (79.03 to 127.66)        | 0.01    | 337.46 (263.13 to 425.04)       | 4.42 (3.36 to 5.62)       | 0.02    | 14.72 (11.19 to 18.71)    |
|            | Hypertensive heart disease | 65.97 (36.72 to 96.86)          | 0.00    | 219.64 (122.27 to 322.49)       | 2.90 (1.60 to 4.49)       | 0.01    | 9.64 (5.34 to 14.95)      |
|            | All causes                 | 18778.56 (16729.51 to 20917.77) | 1.00    | 35568.82 (31687.68 to 39620.74) | 409.96 (372.74 to 445.31) | 1.00    | 776.52 (706.01 to 843.47) |
|            | Non-communicable diseases  | 11875.38 (10484.60 to 13370.93) | 0.63    | 22493.38 (19859.08 to 25326.13) | 292.64 (264.16 to 319.59) | 0.71    | 554.29 (500.35 to 605.34) |
|            | Cardiovascular diseases    | 1832.53 (1637.05 to 2035.11)    | 0.10    | 3471.03 (3100.77 to 3854.74)    | 77.46 (69.99 to 84.93)    | 0.19    | 146.72 (132.57 to 160.86) |
|            | Ischemic heart disease     | 685.27 (604.39 to 774.53)       | 0.04    | 1297.98 (1144.78 to 1467.05)    | 31.88 (28.36 to 35.80)    | 0.08    | 60.39 (53.72 to 67.82)    |
|            | Stroke                     | 832.97 (736.85 to 926.67)       | 0.04    | 1577.75 (1395.68 to 1755.23)    | 35.53 (31.67 to 38.88)    | 0.09    | 67.30 (59.98 to 73.65)    |
| Namibia    | Ischemic stroke            | 288.57 (245.29 to 330.37)       | 0.02    | 546.58 (464.60 to 625.76)       | 13.80 (11.82 to 15.80)    | 0.03    | 26.13 (22.39 to 29.93)    |
|            | Hypertensive heart disease | 86.08 (63.58 to 109.49)         | 0.00    | 163.04 (120.43 to 207.39)       | 3.88 (2.88 to 4.94)       | 0.01    | 7.34 (5.46 to 9.36)       |
|            | All causes                 | 928.04 (822.59 to 1049.77)      | 1.00    | 39432.37 (34951.87 to 44604.52) | 17.00 (15.26 to 18.95)    | 1.00    | 722.36 (648.38 to 805.04) |
|            | Non-communicable diseases  | 347.20 (297.93 to 398.55)       | 0.37    | 14752.45 (12659.19 to 16934.48) | 7.48 (6.65 to 8.51)       | 0.44    | 317.71 (282.64 to 361.67) |
|            | Cardiovascular diseases    | 62.17 (54.93 to 70.89)          | 0.07    | 2641.73 (2333.90 to 3012.06)    | 3.00 (2.67 to 3.43)       | 0.18    | 127.58 (113.27 to 145.55) |
|            | Ischemic heart disease     | 23.61 (20.46 to 27.48)          | 0.03    | 1003.12 (869.44 to 1167.73)     | 1.24 (1.09 to 1.42)       | 0.07    | 52.68 (46.35 to 60.43)    |
|            | Stroke                     | 22.44 (19.46 to 26.03)          | 0.02    | 953.44 (826.69 to 1105.95)      | 1.12 (0.97 to 1.30)       | 0.07    | 47.71 (41.33 to 55.30)    |
|            | Ischemic stroke            | 7.38 (6.20 to 8.79)             | 0.01    | 313.56 (263.38 to 373.32)       | 0.42 (0.34 to 0.51)       | 0.02    | 17.76 (14.62 to 21.76)    |
| Nepal      | Hypertensive heart disease | 5.23 (4.03 to 6.65)             | 0.01    | 222.33 (171.21 to 282.70)       | 0.28 (0.22 to 0.35)       | 0.02    | 11.86 (9.29 to 15.00)     |
|            | All causes                 | 9015.32 (8073.81 to 10065.06)   | 1.00    | 30160.12 (27010.36 to 33671.95) | 182.75 (166.24 to 197.58) | 1.00    | 611.38 (556.15 to 661.00) |
|            | Non-communicable diseases  | 5289.34 (4588.20 to 6066.05)    | 0.59    | 17695.12 (15349.51 to 20293.54) | 120.83 (106.79 to 133.06) | 0.66    | 404.22 (357.26 to 445.16) |
|            | Cardiovascular diseases    | 1153.57 (982.13 to 1307.97)     | 0.13    | 3859.18 (3285.64 to 4375.72)    | 49.25 (42.64 to 55.46)    | 0.27    | 164.76 (142.66 to 185.53) |

**Table 3S National and regional disability-adjusted life years (DALYs) and deaths of non-communicable and cardiovascular diseases for 195 countries according to the GBD 2017 study.**

| Countries   | Cause                      | DALYs                              |         |                                 | Deaths                       |         |                           |
|-------------|----------------------------|------------------------------------|---------|---------------------------------|------------------------------|---------|---------------------------|
|             |                            | Number (thousand)                  | Percent | Rate                            | Number (thousand)            | Percent | Rate                      |
|             |                            | Mean (95% UI)                      | Mean    | Mean (95% UI)                   | Mean (95% UI)                | Mean    | Mean (95% UI)             |
| Netherlands | Ischemic heart disease     | 679.48 (565.02 to 783.20)          | 0.08    | 2273.16 (1890.23 to 2620.13)    | 30.03 (25.71 to 34.06)       | 0.16    | 100.45 (86.01 to 113.95)  |
|             | Stroke                     | 314.43 (263.39 to 364.43)          | 0.03    | 1051.91 (881.16 to 1219.16)     | 13.80 (11.66 to 16.01)       | 0.08    | 46.17 (39.00 to 53.55)    |
|             | Ischemic stroke            | 120.68 (95.68 to 145.88)           | 0.01    | 403.74 (320.09 to 488.04)       | 5.84 (4.53 to 7.16)          | 0.03    | 19.53 (15.17 to 23.96)    |
|             | Hypertensive heart disease | 30.32 (23.80 to 37.92)             | 0.00    | 101.44 (79.63 to 126.86)        | 1.50 (1.17 to 1.89)          | 0.01    | 5.02 (3.90 to 6.32)       |
|             | All causes                 | 4591.39 (3981.60 to 5255.27)       | 1.00    | 26962.03 (23381.16 to 30860.55) | 152.06 (145.36 to 159.47)    | 1.00    | 892.95 (853.59 to 936.46) |
|             | Non-communicable diseases  | 4062.74 (3518.63 to 4644.45)       | 0.88    | 23857.63 (20662.44 to 27273.59) | 136.93 (130.53 to 143.50)    | 0.90    | 804.10 (766.54 to 842.65) |
|             | Cardiovascular diseases    | 596.25 (555.17 to 636.94)          | 0.13    | 3501.38 (3260.10 to 3740.29)    | 40.56 (38.56 to 42.75)       | 0.27    | 238.20 (226.44 to 251.06) |
| New Zealand | Ischemic heart disease     | 247.18 (231.66 to 262.73)          | 0.05    | 1451.53 (1360.36 to 1542.82)    | 18.26 (17.19 to 19.49)       | 0.12    | 107.26 (100.96 to 114.45) |
|             | Stroke                     | 171.76 (156.79 to 186.08)          | 0.04    | 1008.60 (920.73 to 1092.73)     | 10.94 (10.26 to 11.85)       | 0.07    | 64.23 (60.25 to 69.58)    |
|             | Ischemic stroke            | 93.03 (82.31 to 103.41)            | 0.02    | 546.30 (483.35 to 607.27)       | 5.77 (5.37 to 6.25)          | 0.04    | 33.88 (31.55 to 36.69)    |
|             | Hypertensive heart disease | 9.93 (7.58 to 11.33)               | 0.00    | 58.33 (44.50 to 66.51)          | 0.87 (0.49 to 1.00)          | 0.01    | 5.10 (2.86 to 5.90)       |
|             | All causes                 | 1162.70 (1005.91 to 1347.45)       | 1.00    | 26137.73 (22612.98 to 30290.75) | 32.62 (31.32 to 34.09)       | 1.00    | 733.33 (704.15 to 766.30) |
|             | Non-communicable diseases  | 950.72 (826.77 to 1103.70)         | 0.82    | 21372.20 (18585.95 to 24811.40) | 29.80 (28.61 to 31.17)       | 0.91    | 669.88 (643.08 to 700.68) |
|             | Cardiovascular diseases    | 161.34 (152.28 to 171.77)          | 0.14    | 3627.00 (3423.19 to 3861.49)    | 10.90 (10.39 to 11.48)       | 0.33    | 244.99 (233.56 to 258.01) |
| Nicaragua   | Ischemic heart disease     | 81.27 (77.02 to 86.10)             | 0.07    | 1826.91 (1731.40 to 1935.52)    | 5.97 (5.67 to 6.32)          | 0.18    | 134.23 (127.39 to 142.18) |
|             | Stroke                     | 36.64 (33.78 to 39.67)             | 0.03    | 823.65 (759.33 to 891.70)       | 2.45 (2.30 to 2.61)          | 0.08    | 55.04 (51.66 to 58.74)    |
|             | Ischemic stroke            | 18.47 (16.52 to 20.58)             | 0.02    | 415.31 (371.38 to 462.74)       | 1.28 (1.19 to 1.38)          | 0.04    | 28.77 (26.85 to 30.97)    |
|             | Hypertensive heart disease | 3.37 (2.85 to 5.17)                | 0.00    | 75.71 (63.99 to 116.18)         | 0.22 (0.19 to 0.38)          | 0.01    | 4.96 (4.19 to 8.43)       |
|             | All causes                 | 1288.60 (1131.39 to 1453.39)       | 1.00    | 20145.23 (17687.46 to 22721.42) | 23.17 (21.39 to 25.17)       | 1.00    | 362.28 (334.42 to 393.54) |
|             | Non-communicable diseases  | 883.76 (755.85 to 1023.71)         | 0.69    | 13816.17 (11816.41 to 16004.11) | 17.94 (16.47 to 19.62)       | 0.77    | 280.51 (257.55 to 306.67) |
|             | Cardiovascular diseases    | 120.76 (108.38 to 133.40)          | 0.09    | 1887.85 (1694.39 to 2085.54)    | 6.03 (5.50 to 6.61)          | 0.26    | 94.32 (86.04 to 103.40)   |
| Niger       | Ischemic heart disease     | 62.88 (56.41 to 70.02)             | 0.05    | 983.00 (881.90 to 1094.67)      | 3.56 (3.24 to 3.89)          | 0.15    | 55.62 (50.67 to 60.85)    |
|             | Stroke                     | 30.72 (27.56 to 34.35)             | 0.02    | 480.18 (430.90 to 537.01)       | 1.49 (1.34 to 1.66)          | 0.06    | 23.35 (20.94 to 25.93)    |
|             | Ischemic stroke            | 9.11 (8.09 to 10.28)               | 0.01    | 142.49 (126.44 to 160.71)       | 0.54 (0.48 to 0.59)          | 0.02    | 8.41 (7.48 to 9.30)       |
|             | Hypertensive heart disease | 9.11 (7.92 to 10.42)               | 0.01    | 142.47 (123.75 to 162.84)       | 0.49 (0.42 to 0.57)          | 0.02    | 7.69 (6.64 to 8.88)       |
|             | All causes                 | 13115.64 (11364.32 to 15207.67)    | 1.00    | 61357.01 (53164.08 to 71143.83) | 172.90 (151.61 to 198.65)    | 1.00    | 808.86 (709.26 to 929.30) |
|             | Non-communicable diseases  | 2830.54 (2431.18 to 3267.76)       | 0.22    | 13241.70 (11373.46 to 15287.10) | 41.82 (36.08 to 48.01)       | 0.24    | 195.63 (168.79 to 224.58) |
|             | Cardiovascular diseases    | 412.92 (352.65 to 471.15)          | 0.03    | 1931.71 (1649.73 to 2204.10)    | 13.97 (11.90 to 16.08)       | 0.08    | 65.34 (55.67 to 75.21)    |
| Nigeria     | Ischemic heart disease     | 125.58 (93.00 to 158.40)           | 0.01    | 587.51 (435.07 to 741.02)       | 5.32 (3.96 to 6.59)          | 0.03    | 24.88 (18.52 to 30.81)    |
|             | Stroke                     | 166.30 (137.55 to 196.74)          | 0.01    | 777.97 (643.49 to 920.37)       | 5.78 (4.72 to 6.88)          | 0.03    | 27.04 (22.09 to 32.18)    |
|             | Ischemic stroke            | 53.65 (40.89 to 69.92)             | 0.00    | 251.00 (191.27 to 327.10)       | 2.18 (1.61 to 2.89)          | 0.01    | 10.18 (7.54 to 13.50)     |
|             | Hypertensive heart disease | 18.33 (9.67 to 29.53)              | 0.00    | 85.74 (45.23 to 138.15)         | 0.69 (0.35 to 1.14)          | 0.00    | 3.24 (1.66 to 5.33)       |
|             | All causes                 | 117672.21 (102236.47 to 137185.57) | 1.00    | 57098.05 (49608.17 to 66566.52) | 1582.43 (1345.84 to 1895.74) | 1.00    | 767.84 (653.04 to 919.87) |
|             | Non-communicable diseases  | 28148.57 (23516.09 to 34221.93)    | 0.24    | 13658.52 (11410.71 to 16605.50) | 426.62 (337.57 to 555.88)    | 0.27    | 207.01 (163.80 to 269.73) |
|             | Cardiovascular diseases    | 3076.05 (2370.75 to 4071.63)       | 0.03    | 1492.59 (1150.36 to 1975.68)    | 122.52 (92.56 to 163.27)     | 0.08    | 59.45 (44.91 to 79.22)    |
|             | Ischemic heart disease     | 1035.74 (755.35 to 1450.22)        | 0.01    | 502.57 (366.52 to 703.69)       | 51.10 (38.04 to 69.37)       | 0.03    | 24.80 (18.46 to 33.66)    |



**Table 3S National and regional disability-adjusted life years (DALYs) and deaths of non-communicable and cardiovascular diseases for 195 countries according to the GBD 2017 study.**

| Countries                | Cause                      | DALYs                           |         |                                 | Deaths                       |         |                            |
|--------------------------|----------------------------|---------------------------------|---------|---------------------------------|------------------------------|---------|----------------------------|
|                          |                            | Number (thousand)               | Percent | Rate                            | Number (thousand)            | Percent | Rate                       |
|                          |                            | Mean (95% UI)                   | Mean    | Mean (95% UI)                   | Mean (95% UI)                | Mean    | Mean (95% UI)              |
| North Korea              | Stroke                     | 1083.49 (830.01 to 1447.06)     | 0.01    | 525.74 (402.75 to 702.16)       | 45.52 (34.10 to 61.45)       | 0.03    | 22.09 (16.55 to 29.82)     |
|                          | Ischemic stroke            | 396.78 (296.17 to 520.17)       | 0.00    | 192.53 (143.71 to 252.40)       | 19.00 (13.37 to 25.78)       | 0.01    | 9.22 (6.49 to 12.51)       |
|                          | Hypertensive heart disease | 143.34 (86.45 to 219.93)        | 0.00    | 69.55 (41.95 to 106.72)         | 5.70 (3.23 to 8.97)          | 0.00    | 2.76 (1.57 to 4.35)        |
|                          | All causes                 | 8652.55 (7614.73 to 9687.50)    | 1.00    | 33645.72 (29610.12 to 37670.14) | 235.06 (209.70 to 259.51)    | 1.00    | 914.05 (815.43 to 1009.10) |
|                          | Non-communicable diseases  | 6818.85 (6002.54 to 7638.42)    | 0.79    | 26515.33 (23341.06 to 29702.22) | 204.45 (181.83 to 226.46)    | 0.87    | 795.02 (707.05 to 880.60)  |
|                          | Cardiovascular diseases    | 1992.48 (1753.57 to 2232.77)    | 0.23    | 7747.81 (6818.82 to 8682.18)    | 90.24 (79.31 to 101.41)      | 0.38    | 350.90 (308.39 to 394.35)  |
|                          | Ischemic heart disease     | 629.68 (528.47 to 735.49)       | 0.07    | 2448.51 (2054.97 to 2859.97)    | 30.48 (25.16 to 35.54)       | 0.13    | 118.50 (97.82 to 138.19)   |
|                          | Stroke                     | 1114.40 (975.13 to 1259.14)     | 0.13    | 4333.37 (3791.81 to 4896.22)    | 49.42 (43.24 to 56.29)       | 0.21    | 192.18 (168.14 to 218.87)  |
| Northern Mariana Islands | Ischemic stroke            | 382.32 (321.18 to 438.97)       | 0.04    | 1486.66 (1248.90 to 1706.94)    | 17.96 (14.49 to 20.77)       | 0.08    | 69.82 (56.33 to 80.76)     |
|                          | Hypertensive heart disease | 90.63 (66.73 to 121.67)         | 0.01    | 352.40 (259.50 to 473.11)       | 5.05 (3.57 to 7.30)          | 0.02    | 19.65 (13.90 to 28.38)     |
|                          | All causes                 | 12.18 (10.70 to 13.88)          | 1.00    | 27138.94 (23847.41 to 30922.24) | 0.27 (0.24 to 0.29)          | 1.00    | 591.56 (540.96 to 642.45)  |
|                          | Non-communicable diseases  | 9.94 (8.72 to 11.42)            | 0.82    | 22158.05 (19437.63 to 25441.46) | 0.23 (0.21 to 0.25)          | 0.85    | 503.82 (461.78 to 548.49)  |
|                          | Cardiovascular diseases    | 2.20 (1.99 to 2.41)             | 0.18    | 4898.51 (4441.66 to 5380.61)    | 0.08 (0.07 to 0.09)          | 0.31    | 182.03 (165.62 to 199.47)  |
|                          | Ischemic heart disease     | 1.03 (0.92 to 1.15)             | 0.08    | 2298.39 (2053.83 to 2564.96)    | 0.04 (0.04 to 0.05)          | 0.15    | 91.52 (83.04 to 100.97)    |
|                          | Stroke                     | 0.77 (0.69 to 0.85)             | 0.06    | 1712.78 (1538.68 to 1890.07)    | 0.03 (0.02 to 0.03)          | 0.10    | 61.95 (55.42 to 68.53)     |
|                          | Ischemic stroke            | 0.21 (0.18 to 0.24)             | 0.02    | 471.69 (407.24 to 534.92)       | 0.01 (0.01 to 0.01)          | 0.03    | 15.97 (14.22 to 18.03)     |
| Norway                   | Hypertensive heart disease | 0.06 (0.05 to 0.07)             | 0.01    | 136.31 (118.02 to 158.30)       | 0.00 (0.00 to 0.00)          | 0.01    | 5.17 (4.52 to 6.12)        |
|                          | All causes                 | 1322.07 (1142.13 to 1528.77)    | 1.00    | 25119.19 (21700.36 to 29046.54) | 41.37 (40.76 to 41.99)       | 1.00    | 786.11 (774.40 to 797.75)  |
|                          | Non-communicable diseases  | 1133.37 (977.82 to 1310.78)     | 0.86    | 21534.02 (18578.45 to 24904.72) | 36.56 (36.01 to 37.11)       | 0.88    | 694.58 (684.28 to 705.16)  |
|                          | Cardiovascular diseases    | 176.50 (166.51 to 186.86)       | 0.13    | 3353.47 (3163.60 to 3550.40)    | 12.89 (12.54 to 13.36)       | 0.31    | 244.83 (238.17 to 253.80)  |
|                          | Ischemic heart disease     | 80.12 (76.63 to 84.68)          | 0.06    | 1522.36 (1455.91 to 1608.92)    | 6.54 (6.31 to 6.97)          | 0.16    | 124.25 (119.82 to 132.35)  |
|                          | Stroke                     | 50.86 (46.05 to 55.62)          | 0.04    | 966.26 (874.92 to 1056.75)      | 3.20 (3.07 to 3.41)          | 0.08    | 60.72 (58.29 to 64.85)     |
|                          | Ischemic stroke            | 29.58 (25.76 to 33.31)          | 0.02    | 562.10 (489.43 to 632.93)       | 1.79 (1.72 to 1.90)          | 0.04    | 34.03 (32.65 to 36.03)     |
|                          | Hypertensive heart disease | 2.30 (1.92 to 2.86)             | 0.00    | 43.73 (36.40 to 54.40)          | 0.19 (0.12 to 0.21)          | 0.00    | 3.64 (2.33 to 3.95)        |
| Oman                     | All causes                 | 890.45 (754.19 to 1034.34)      | 1.00    | 19631.57 (16627.53 to 22803.73) | 11.18 (9.70 to 12.79)        | 1.00    | 246.41 (213.92 to 281.88)  |
|                          | Non-communicable diseases  | 626.62 (513.68 to 745.75)       | 0.70    | 13815.05 (11324.96 to 16441.40) | 7.52 (6.49 to 8.58)          | 0.67    | 165.85 (143.00 to 189.09)  |
|                          | Cardiovascular diseases    | 121.21 (103.77 to 140.45)       | 0.14    | 2672.18 (2287.76 to 3096.41)    | 4.13 (3.53 to 4.77)          | 0.37    | 91.01 (77.80 to 105.17)    |
|                          | Ischemic heart disease     | 73.06 (60.68 to 86.74)          | 0.08    | 1610.79 (1337.86 to 1912.32)    | 2.84 (2.40 to 3.32)          | 0.25    | 62.71 (52.99 to 73.20)     |
|                          | Stroke                     | 27.20 (23.44 to 31.32)          | 0.03    | 599.67 (516.70 to 690.42)       | 0.85 (0.72 to 0.98)          | 0.08    | 18.68 (15.92 to 21.55)     |
|                          | Ischemic stroke            | 9.76 (8.29 to 11.31)            | 0.01    | 215.09 (182.75 to 249.28)       | 0.34 (0.29 to 0.41)          | 0.03    | 7.56 (6.29 to 8.94)        |
|                          | Hypertensive heart disease | 1.82 (1.49 to 2.25)             | 0.00    | 40.08 (32.83 to 49.69)          | 0.05 (0.04 to 0.08)          | 0.00    | 1.19 (0.92 to 1.83)        |
|                          | All causes                 | 84322.25 (74324.40 to 94898.95) | 1.00    | 39350.07 (34684.44 to 44285.82) | 1416.04 (1249.53 to 1589.76) | 1.00    | 660.81 (583.11 to 741.88)  |
| Pakistan                 | Non-communicable diseases  | 40091.44 (34964.68 to 45701.60) | 0.48    | 18709.19 (16316.72 to 21327.24) | 854.00 (735.06 to 977.27)    | 0.60    | 398.53 (343.03 to 456.06)  |
|                          | Cardiovascular diseases    | 9685.49 (8186.39 to 11296.19)   | 0.12    | 4519.86 (3820.28 to 5271.51)    | 381.42 (324.45 to 440.91)    | 0.27    | 178.00 (151.41 to 205.75)  |
|                          | Ischemic heart disease     | 5386.17 (4434.71 to 6388.13)    | 0.06    | 2513.52 (2069.52 to 2981.10)    | 216.93 (182.64 to 255.25)    | 0.15    | 101.23 (85.23 to 119.11)   |
|                          | Stroke                     | 2877.83 (2397.47 to 3352.69)    | 0.03    | 1342.98 (1118.81 to 1564.58)    | 117.38 (97.26 to 137.88)     | 0.08    | 54.78 (45.39 to 64.34)     |

**Table 3S National and regional disability-adjusted life years (DALYs) and deaths of non-communicable and cardiovascular diseases for 195 countries according to the GBD 2017 study.**

| Countries        | Cause                      | DALYs                        |         |                                 | Deaths                    |         |                            |
|------------------|----------------------------|------------------------------|---------|---------------------------------|---------------------------|---------|----------------------------|
|                  |                            | Number (thousand)            | Percent | Rate                            | Number (thousand)         | Percent | Rate                       |
|                  |                            | Mean (95% UI)                | Mean    | Mean (95% UI)                   | Mean (95% UI)             | Mean    | Mean (95% UI)              |
| Palestine        | Ischemic stroke            | 980.24 (769.69 to 1206.55)   | 0.01    | 457.44 (359.18 to 563.05)       | 46.72 (36.21 to 57.67)    | 0.03    | 21.80 (16.90 to 26.91)     |
|                  | Hypertensive heart disease | 302.90 (223.84 to 417.11)    | 0.00    | 141.35 (104.46 to 194.65)       | 14.26 (10.76 to 19.20)    | 0.01    | 6.66 (5.02 to 8.96)        |
|                  | All causes                 | 983.30 (854.62 to 1129.78)   | 1.00    | 20265.41 (17613.36 to 23284.34) | 14.45 (13.80 to 15.13)    | 1.00    | 297.76 (284.48 to 311.88)  |
|                  | Non-communicable diseases  | 681.64 (580.44 to 797.32)    | 0.69    | 14048.45 (11962.75 to 16432.57) | 11.33 (10.80 to 11.92)    | 0.78    | 233.48 (222.67 to 245.72)  |
|                  | Cardiovascular diseases    | 123.71 (115.97 to 131.77)    | 0.13    | 2549.52 (2390.01 to 2715.80)    | 5.33 (5.02 to 5.67)       | 0.37    | 109.78 (103.50 to 116.78)  |
|                  | Ischemic heart disease     | 68.14 (63.43 to 73.40)       | 0.07    | 1404.25 (1307.33 to 1512.73)    | 3.13 (2.92 to 3.36)       | 0.22    | 64.46 (60.11 to 69.19)     |
|                  | Stroke                     | 34.62 (31.85 to 37.30)       | 0.04    | 713.42 (656.41 to 768.73)       | 1.55 (1.44 to 1.67)       | 0.11    | 31.99 (29.66 to 34.33)     |
| Panama           | Ischemic stroke            | 21.59 (19.70 to 23.50)       | 0.02    | 444.88 (406.09 to 484.41)       | 1.07 (0.98 to 1.16)       | 0.07    | 22.02 (20.25 to 23.94)     |
|                  | Hypertensive heart disease | 4.84 (4.23 to 6.60)          | 0.00    | 99.82 (87.11 to 136.07)         | 0.24 (0.21 to 0.33)       | 0.02    | 5.03 (4.36 to 6.82)        |
|                  | All causes                 | 880.65 (774.73 to 993.74)    | 1.00    | 22459.42 (19758.05 to 25343.62) | 18.98 (18.07 to 19.88)    | 1.00    | 484.01 (460.85 to 507.00)  |
|                  | Non-communicable diseases  | 599.96 (516.35 to 690.57)    | 0.68    | 15300.95 (13168.56 to 17611.75) | 14.61 (13.89 to 15.31)    | 0.77    | 372.61 (354.34 to 390.57)  |
|                  | Cardiovascular diseases    | 98.16 (92.05 to 104.45)      | 0.11    | 2503.52 (2347.60 to 2663.79)    | 5.25 (4.97 to 5.53)       | 0.28    | 133.78 (126.65 to 141.11)  |
|                  | Ischemic heart disease     | 42.02 (39.35 to 44.80)       | 0.05    | 1071.74 (1003.67 to 1142.67)    | 2.54 (2.37 to 2.71)       | 0.13    | 64.75 (60.48 to 69.18)     |
|                  | Stroke                     | 30.28 (28.44 to 32.16)       | 0.03    | 772.28 (725.40 to 820.13)       | 1.74 (1.63 to 1.86)       | 0.09    | 44.35 (41.47 to 47.33)     |
| Papua New Guinea | Ischemic stroke            | 10.60 (9.72 to 11.49)        | 0.01    | 270.23 (247.89 to 292.94)       | 0.73 (0.67 to 0.78)       | 0.04    | 18.53 (16.99 to 19.94)     |
|                  | Hypertensive heart disease | 4.81 (4.17 to 6.05)          | 0.01    | 122.55 (106.33 to 154.31)       | 0.27 (0.23 to 0.37)       | 0.01    | 6.81 (5.95 to 9.56)        |
|                  | All causes                 | 4854.05 (4264.25 to 5549.05) | 1.00    | 52603.89 (46212.18 to 60135.73) | 84.87 (74.54 to 96.52)    | 1.00    | 919.74 (807.79 to 1045.98) |
|                  | Non-communicable diseases  | 2633.57 (2300.12 to 3000.99) | 0.54    | 28540.26 (24926.62 to 32522.03) | 52.76 (46.43 to 60.25)    | 0.62    | 571.75 (503.16 to 652.95)  |
|                  | Cardiovascular diseases    | 844.23 (725.70 to 992.54)    | 0.17    | 9148.98 (7864.46 to 10756.24)   | 23.55 (20.50 to 27.30)    | 0.28    | 255.18 (222.17 to 295.89)  |
|                  | Ischemic heart disease     | 355.39 (295.05 to 430.08)    | 0.07    | 3851.44 (3197.52 to 4660.79)    | 10.95 (9.26 to 12.97)     | 0.13    | 118.62 (100.40 to 140.52)  |
|                  | Stroke                     | 290.69 (241.95 to 350.38)    | 0.06    | 3150.21 (2622.02 to 3797.09)    | 8.02 (6.67 to 9.59)       | 0.09    | 86.92 (72.29 to 103.92)    |
| Paraguay         | Ischemic stroke            | 53.02 (43.32 to 64.64)       | 0.01    | 574.59 (469.44 to 700.50)       | 1.62 (1.30 to 1.99)       | 0.02    | 17.54 (14.05 to 21.59)     |
|                  | Hypertensive heart disease | 34.77 (19.10 to 45.85)       | 0.01    | 376.78 (207.03 to 496.85)       | 1.07 (0.60 to 1.39)       | 0.01    | 11.63 (6.52 to 15.09)      |
|                  | All causes                 | 1616.04 (1399.92 to 1863.83) | 1.00    | 23315.58 (20197.44 to 26890.58) | 32.70 (28.81 to 37.32)    | 1.00    | 471.72 (415.68 to 538.43)  |
|                  | Non-communicable diseases  | 1133.32 (964.96 to 1325.97)  | 0.70    | 16350.99 (13921.98 to 19130.55) | 25.03 (21.91 to 28.76)    | 0.77    | 361.17 (316.05 to 414.94)  |
|                  | Cardiovascular diseases    | 205.12 (178.98 to 237.05)    | 0.13    | 2959.32 (2582.28 to 3420.03)    | 9.84 (8.60 to 11.32)      | 0.30    | 141.90 (124.05 to 163.36)  |
|                  | Ischemic heart disease     | 95.41 (82.18 to 111.45)      | 0.06    | 1376.50 (1185.62 to 1607.98)    | 4.93 (4.28 to 5.68)       | 0.15    | 71.14 (61.81 to 81.97)     |
|                  | Stroke                     | 68.06 (59.18 to 78.72)       | 0.04    | 981.88 (853.89 to 1135.74)      | 3.30 (2.88 to 3.82)       | 0.10    | 47.63 (41.49 to 55.06)     |
| Peru             | Ischemic stroke            | 18.97 (16.65 to 21.67)       | 0.01    | 273.72 (240.23 to 312.64)       | 1.13 (0.98 to 1.31)       | 0.03    | 16.27 (14.11 to 18.86)     |
|                  | Hypertensive heart disease | 11.79 (7.96 to 14.29)        | 0.01    | 170.11 (114.85 to 206.21)       | 0.66 (0.37 to 0.82)       | 0.02    | 9.57 (5.35 to 11.77)       |
|                  | All causes                 | 7014.83 (6038.31 to 8052.03) | 1.00    | 21116.53 (18176.95 to 24238.77) | 141.76 (126.72 to 157.91) | 1.00    | 426.73 (381.45 to 475.35)  |
|                  | Non-communicable diseases  | 4608.53 (3852.01 to 5399.41) | 0.66    | 13872.92 (11595.59 to 16253.69) | 99.49 (88.35 to 111.60)   | 0.70    | 299.48 (265.97 to 335.95)  |
|                  | Cardiovascular diseases    | 569.75 (501.20 to 638.69)    | 0.08    | 1715.10 (1508.74 to 1922.62)    | 27.72 (24.48 to 30.94)    | 0.20    | 83.44 (73.70 to 93.14)     |
|                  | Ischemic heart disease     | 259.51 (226.65 to 295.50)    | 0.04    | 781.20 (682.26 to 889.54)       | 15.11 (13.35 to 16.99)    | 0.11    | 45.49 (40.19 to 51.15)     |
|                  | Stroke                     | 167.37 (146.38 to 187.98)    | 0.02    | 503.84 (440.66 to 565.87)       | 7.98 (7.00 to 9.00)       | 0.06    | 24.04 (21.07 to 27.08)     |
|                  | Ischemic stroke            | 59.10 (51.44 to 66.83)       | 0.01    | 177.92 (154.86 to 201.17)       | 3.76 (3.31 to 4.22)       | 0.03    | 11.30 (9.97 to 12.71)      |

**Table 3S National and regional disability-adjusted life years (DALYs) and deaths of non-communicable and cardiovascular diseases for 195 countries according to the GBD 2017 study.**

| Countries   | Cause                      | DALYs                           |         |                                 | Deaths                    |         |                              |
|-------------|----------------------------|---------------------------------|---------|---------------------------------|---------------------------|---------|------------------------------|
|             |                            | Number (thousand)               | Percent | Rate                            | Number (thousand)         | Percent | Rate                         |
|             |                            | Mean (95% UI)                   | Mean    | Mean (95% UI)                   | Mean (95% UI)             | Mean    | Mean (95% UI)                |
| Philippines | Hypertensive heart disease | 20.94 (16.27 to 24.83)          | 0.00    | 63.04 (48.99 to 74.74)          | 1.05 (0.83 to 1.27)       | 0.01    | 3.16 (2.49 to 3.83)          |
|             | All causes                 | 32543.80 (29256.04 to 36279.80) | 1.00    | 31452.21 (28274.73 to 35062.90) | 666.56 (598.76 to 736.92) | 1.00    | 644.20 (578.67 to 712.20)    |
|             | Non-communicable diseases  | 21108.73 (18592.20 to 23852.09) | 0.65    | 20400.70 (17968.58 to 23052.04) | 462.18 (411.16 to 512.54) | 0.69    | 446.68 (397.37 to 495.34)    |
|             | Cardiovascular diseases    | 5675.42 (5010.41 to 6362.59)    | 0.17    | 5485.05 (4842.35 to 6149.18)    | 217.55 (192.77 to 242.37) | 0.33    | 210.26 (186.30 to 234.24)    |
|             | Ischemic heart disease     | 2578.36 (2259.91 to 2933.63)    | 0.08    | 2491.87 (2184.11 to 2835.23)    | 105.23 (93.09 to 118.50)  | 0.16    | 101.71 (89.97 to 114.53)     |
|             | Stroke                     | 1971.83 (1734.82 to 2217.56)    | 0.06    | 1905.69 (1676.63 to 2143.18)    | 73.30 (64.63 to 82.40)    | 0.11    | 70.84 (62.46 to 79.64)       |
|             | Ischemic stroke            | 482.17 (424.99 to 540.92)       | 0.01    | 466.00 (410.73 to 522.77)       | 20.96 (18.50 to 23.49)    | 0.03    | 20.26 (17.88 to 22.70)       |
| Poland      | Hypertensive heart disease | 564.64 (323.94 to 664.11)       | 0.02    | 545.71 (313.08 to 641.83)       | 24.57 (14.26 to 28.72)    | 0.04    | 23.75 (13.79 to 27.76)       |
|             | All causes                 | 12570.49 (11156.23 to 14154.48) | 1.00    | 32741.56 (29057.92 to 36867.28) | 394.35 (379.11 to 411.21) | 1.00    | 1027.14 (987.44 to 1071.05)  |
|             | Non-communicable diseases  | 10358.44 (9227.30 to 11569.51)  | 0.82    | 26979.97 (24033.76 to 30134.37) | 359.32 (345.40 to 374.83) | 0.91    | 935.90 (899.63 to 976.29)    |
|             | Cardiovascular diseases    | 2776.50 (2618.46 to 2925.34)    | 0.22    | 7231.77 (6820.13 to 7619.45)    | 168.71 (162.01 to 176.16) | 0.43    | 439.43 (421.98 to 458.83)    |
|             | Ischemic heart disease     | 1420.86 (1350.82 to 1496.73)    | 0.11    | 3700.84 (3518.39 to 3898.44)    | 97.69 (93.28 to 102.40)   | 0.25    | 254.45 (242.96 to 266.71)    |
|             | Stroke                     | 740.45 (681.18 to 795.72)       | 0.06    | 1928.61 (1774.23 to 2072.56)    | 39.30 (37.13 to 41.62)    | 0.10    | 102.37 (96.72 to 108.41)     |
|             | Ischemic stroke            | 460.98 (414.66 to 503.77)       | 0.04    | 1200.68 (1080.03 to 1312.13)    | 26.28 (24.60 to 28.01)    | 0.07    | 68.44 (64.09 to 72.94)       |
| Portugal    | Hypertensive heart disease | 70.50 (61.16 to 107.62)         | 0.01    | 183.63 (159.30 to 280.30)       | 4.20 (3.62 to 7.16)       | 0.01    | 10.93 (9.43 to 18.64)        |
|             | All causes                 | 3149.87 (2746.60 to 3597.81)    | 1.00    | 29488.43 (25713.15 to 33681.94) | 113.75 (108.93 to 118.56) | 1.00    | 1064.94 (1019.74 to 1109.93) |
|             | Non-communicable diseases  | 2726.31 (2374.08 to 3117.78)    | 0.87    | 25523.15 (22225.68 to 29188.02) | 100.74 (96.41 to 105.16)  | 0.89    | 943.15 (902.62 to 984.46)    |
|             | Cardiovascular diseases    | 496.63 (464.35 to 525.87)       | 0.16    | 4649.31 (4347.11 to 4923.11)    | 36.94 (35.13 to 38.77)    | 0.32    | 345.86 (328.90 to 362.98)    |
|             | Ischemic heart disease     | 174.21 (162.35 to 185.50)       | 0.06    | 1630.93 (1519.89 to 1736.64)    | 13.76 (12.87 to 14.69)    | 0.12    | 128.83 (120.50 to 137.55)    |
|             | Stroke                     | 204.94 (191.87 to 218.21)       | 0.07    | 1918.59 (1796.22 to 2042.84)    | 15.82 (14.89 to 16.82)    | 0.14    | 148.11 (139.35 to 157.51)    |
|             | Ischemic stroke            | 98.90 (90.74 to 106.92)         | 0.03    | 925.91 (849.47 to 1000.92)      | 8.22 (7.63 to 8.86)       | 0.07    | 76.97 (71.48 to 82.91)       |
| Puerto Rico | Hypertensive heart disease | 14.99 (9.61 to 16.97)           | 0.00    | 140.33 (89.96 to 158.91)        | 1.41 (0.61 to 1.66)       | 0.01    | 13.22 (5.72 to 15.56)        |
|             | All causes                 | 1126.78 (1013.91 to 1260.86)    | 1.00    | 30737.06 (27657.94 to 34394.49) | 34.52 (33.09 to 35.97)    | 1.00    | 941.65 (902.74 to 981.17)    |
|             | Non-communicable diseases  | 841.02 (741.89 to 960.58)       | 0.75    | 22941.74 (20237.80 to 26203.22) | 27.65 (26.43 to 28.93)    | 0.80    | 754.16 (720.98 to 789.13)    |
|             | Cardiovascular diseases    | 144.66 (135.63 to 153.54)       | 0.13    | 3946.07 (3699.71 to 4188.38)    | 8.45 (8.02 to 8.90)       | 0.24    | 230.43 (218.87 to 242.91)    |
|             | Ischemic heart disease     | 72.46 (68.24 to 77.13)          | 0.06    | 1976.70 (1861.58 to 2103.96)    | 4.49 (4.25 to 4.79)       | 0.13    | 122.53 (115.88 to 130.61)    |
|             | Stroke                     | 31.90 (29.49 to 34.56)          | 0.03    | 870.26 (804.35 to 942.87)       | 1.87 (1.74 to 2.01)       | 0.05    | 50.97 (47.55 to 54.80)       |
|             | Ischemic stroke            | 13.94 (12.30 to 15.40)          | 0.01    | 380.31 (335.55 to 420.08)       | 0.85 (0.78 to 0.92)       | 0.02    | 23.11 (21.32 to 25.22)       |
| Qatar       | Hypertensive heart disease | 14.13 (10.47 to 16.08)          | 0.01    | 385.35 (285.59 to 438.63)       | 0.80 (0.58 to 0.91)       | 0.02    | 21.85 (15.77 to 24.93)       |
|             | All causes                 | 448.13 (365.06 to 533.31)       | 1.00    | 16311.49 (13287.91 to 19412.10) | 3.75 (3.16 to 4.38)       | 1.00    | 136.34 (115.16 to 159.53)    |
|             | Non-communicable diseases  | 343.94 (274.15 to 415.22)       | 0.77    | 12519.29 (9978.76 to 15113.60)  | 2.49 (2.12 to 2.89)       | 0.66    | 90.63 (77.12 to 105.08)      |
|             | Cardiovascular diseases    | 32.29 (27.09 to 37.97)          | 0.07    | 1175.36 (986.01 to 1382.05)     | 0.92 (0.77 to 1.08)       | 0.24    | 33.40 (27.96 to 39.37)       |
|             | Ischemic heart disease     | 18.73 (15.44 to 22.47)          | 0.04    | 681.66 (561.99 to 818.01)       | 0.64 (0.53 to 0.76)       | 0.17    | 23.26 (19.42 to 27.63)       |
|             | Stroke                     | 7.98 (6.65 to 9.30)             | 0.02    | 290.41 (241.91 to 338.50)       | 0.18 (0.15 to 0.21)       | 0.05    | 6.40 (5.33 to 7.59)          |
|             | Ischemic stroke            | 2.74 (2.27 to 3.26)             | 0.01    | 99.77 (82.60 to 118.70)         | 0.06 (0.05 to 0.07)       | 0.01    | 2.02 (1.70 to 2.39)          |
|             | Hypertensive heart disease | 0.52 (0.42 to 0.65)             | 0.00    | 18.94 (15.46 to 23.69)          | 0.01 (0.01 to 0.02)       | 0.00    | 0.44 (0.36 to 0.67)          |

**Table 3S National and regional disability-adjusted life years (DALYs) and deaths of non-communicable and cardiovascular diseases for 195 countries according to the GBD 2017 study.**

| Countries                        | Cause                      | DALYs                           |         |                                 | Deaths                       |         |                              |
|----------------------------------|----------------------------|---------------------------------|---------|---------------------------------|------------------------------|---------|------------------------------|
|                                  |                            | Number (thousand)               | Percent | Rate                            | Number (thousand)            | Percent | Rate                         |
|                                  |                            | Mean (95% UI)                   | Mean    | Mean (95% UI)                   | Mean (95% UI)                | Mean    | Mean (95% UI)                |
| Romania                          | All causes                 | 7559.01 (6827.27 to 8378.24)    | 1.00    | 38896.25 (35130.98 to 43111.78) | 261.10 (250.66 to 270.83)    | 1.00    | 1343.54 (1289.84 to 1393.61) |
|                                  | Non-communicable diseases  | 6291.89 (5718.10 to 6944.81)    | 0.83    | 32376.05 (29423.52 to 35735.78) | 242.44 (232.48 to 251.59)    | 0.93    | 1247.52 (1196.29 to 1294.60) |
|                                  | Cardiovascular diseases    | 2305.35 (2196.16 to 2407.43)    | 0.31    | 11862.60 (11300.74 to 12387.88) | 144.85 (139.12 to 150.33)    | 0.55    | 745.35 (715.88 to 773.57)    |
|                                  | Ischemic heart disease     | 1003.80 (954.35 to 1057.81)     | 0.13    | 5165.26 (4910.78 to 5443.14)    | 67.53 (64.43 to 71.26)       | 0.26    | 347.49 (331.56 to 366.67)    |
|                                  | Stroke                     | 831.01 (775.96 to 881.83)       | 0.11    | 4276.13 (3992.84 to 4537.63)    | 49.81 (47.41 to 52.75)       | 0.19    | 256.29 (243.97 to 271.42)    |
|                                  | Ischemic stroke            | 420.52 (384.39 to 455.70)       | 0.06    | 2163.86 (1977.97 to 2344.89)    | 26.07 (24.55 to 28.09)       | 0.10    | 134.17 (126.34 to 144.52)    |
|                                  | Hypertensive heart disease | 165.19 (116.00 to 184.51)       | 0.02    | 850.02 (596.91 to 949.41)       | 12.01 (7.30 to 13.29)        | 0.05    | 61.78 (37.57 to 68.40)       |
| Russian Federation               | All causes                 | 61229.88 (56133.02 to 67051.69) | 1.00    | 41883.81 (38397.34 to 45866.17) | 1834.72 (1822.20 to 1846.66) | 1.00    | 1255.03 (1246.46 to 1263.19) |
|                                  | Non-communicable diseases  | 47626.09 (43525.60 to 52290.04) | 0.78    | 32578.24 (29773.34 to 35768.58) | 1605.09 (1593.57 to 1615.80) | 0.87    | 1097.95 (1090.07 to 1105.27) |
|                                  | Cardiovascular diseases    | 18642.92 (18258.71 to 19024.25) | 0.31    | 12752.54 (12489.73 to 13013.38) | 1000.22 (991.37 to 1013.34)  | 0.55    | 684.19 (678.14 to 693.17)    |
|                                  | Ischemic heart disease     | 9602.95 (9428.80 to 9971.27)    | 0.16    | 6568.82 (6449.69 to 6820.76)    | 562.92 (555.00 to 578.87)    | 0.31    | 385.06 (379.65 to 395.97)    |
|                                  | Stroke                     | 5802.50 (5546.90 to 6051.18)    | 0.09    | 3969.15 (3794.31 to 4139.26)    | 317.55 (312.22 to 326.52)    | 0.17    | 217.22 (213.57 to 223.35)    |
|                                  | Ischemic stroke            | 3712.43 (3508.12 to 3905.65)    | 0.06    | 2539.46 (2399.70 to 2671.63)    | 219.73 (215.86 to 226.81)    | 0.12    | 150.31 (147.66 to 155.15)    |
|                                  | Hypertensive heart disease | 325.11 (222.51 to 350.26)       | 0.01    | 222.39 (152.21 to 239.59)       | 17.41 (10.46 to 18.75)       | 0.01    | 11.91 (7.15 to 12.83)        |
| Rwanda                           | All causes                 | 4434.80 (3929.50 to 5017.53)    | 1.00    | 35325.34 (31300.35 to 39967.00) | 68.23 (61.91 to 75.08)       | 1.00    | 543.48 (493.16 to 598.07)    |
|                                  | Non-communicable diseases  | 1736.39 (1496.74 to 2001.03)    | 0.39    | 13831.21 (11922.23 to 15939.18) | 29.83 (26.62 to 33.28)       | 0.44    | 237.61 (212.04 to 265.12)    |
|                                  | Cardiovascular diseases    | 203.07 (179.32 to 229.05)       | 0.05    | 1617.52 (1428.36 to 1824.45)    | 8.13 (7.13 to 9.22)          | 0.12    | 64.72 (56.76 to 73.40)       |
|                                  | Ischemic heart disease     | 55.71 (39.78 to 72.58)          | 0.01    | 443.75 (316.89 to 578.12)       | 2.52 (1.77 to 3.33)          | 0.04    | 20.06 (14.07 to 26.55)       |
|                                  | Stroke                     | 77.86 (62.12 to 93.06)          | 0.02    | 620.16 (494.83 to 741.26)       | 3.27 (2.52 to 3.99)          | 0.05    | 26.03 (20.05 to 31.81)       |
|                                  | Ischemic stroke            | 24.09 (16.00 to 32.40)          | 0.01    | 191.89 (127.48 to 258.10)       | 1.15 (0.71 to 1.57)          | 0.02    | 9.14 (5.65 to 12.53)         |
|                                  | Hypertensive heart disease | 25.19 (12.17 to 40.71)          | 0.01    | 200.65 (96.98 to 324.26)        | 1.24 (0.59 to 2.07)          | 0.02    | 9.91 (4.67 to 16.47)         |
| Saint Lucia                      | All causes                 | 50.19 (44.98 to 55.91)          | 1.00    | 28439.89 (25489.61 to 31681.20) | 1.33 (1.27 to 1.40)          | 1.00    | 753.46 (719.02 to 790.50)    |
|                                  | Non-communicable diseases  | 38.68 (34.38 to 43.28)          | 0.77    | 21916.16 (19482.18 to 24524.65) | 1.11 (1.06 to 1.17)          | 0.84    | 630.12 (600.60 to 662.44)    |
|                                  | Cardiovascular diseases    | 8.30 (7.80 to 8.79)             | 0.17    | 4701.64 (4417.69 to 4982.34)    | 0.42 (0.40 to 0.44)          | 0.32    | 239.20 (226.40 to 251.70)    |
|                                  | Ischemic heart disease     | 2.51 (2.32 to 2.69)             | 0.05    | 1421.07 (1314.48 to 1526.51)    | 0.14 (0.13 to 0.15)          | 0.10    | 78.00 (72.09 to 83.78)       |
|                                  | Stroke                     | 2.90 (2.70 to 3.11)             | 0.06    | 1644.98 (1529.33 to 1761.91)    | 0.15 (0.14 to 0.16)          | 0.12    | 86.83 (80.59 to 92.62)       |
|                                  | Ischemic stroke            | 0.99 (0.91 to 1.07)             | 0.02    | 560.41 (513.53 to 605.04)       | 0.06 (0.06 to 0.07)          | 0.05    | 34.27 (31.36 to 36.87)       |
|                                  | Hypertensive heart disease | 0.72 (0.59 to 0.88)             | 0.01    | 408.70 (337.13 to 497.94)       | 0.04 (0.03 to 0.05)          | 0.03    | 22.17 (17.58 to 28.34)       |
| Saint Vincent and the Grenadines | All causes                 | 37.77 (34.15 to 41.67)          | 1.00    | 33096.44 (29925.40 to 36517.19) | 1.01 (0.96 to 1.05)          | 1.00    | 880.87 (844.11 to 920.86)    |
|                                  | Non-communicable diseases  | 28.50 (25.65 to 31.52)          | 0.75    | 24976.32 (22476.46 to 27626.19) | 0.83 (0.79 to 0.86)          | 0.82    | 724.44 (694.41 to 758.02)    |
|                                  | Cardiovascular diseases    | 6.88 (6.52 to 7.25)             | 0.18    | 6030.68 (5709.87 to 6356.23)    | 0.35 (0.33 to 0.37)          | 0.35    | 305.04 (290.84 to 320.28)    |
|                                  | Ischemic heart disease     | 2.78 (2.62 to 2.95)             | 0.07    | 2439.67 (2293.37 to 2587.49)    | 0.16 (0.15 to 0.17)          | 0.16    | 136.92 (129.03 to 145.20)    |
|                                  | Stroke                     | 2.10 (1.96 to 2.24)             | 0.06    | 1836.52 (1713.61 to 1958.88)    | 0.11 (0.10 to 0.11)          | 0.10    | 92.06 (86.51 to 98.15)       |
|                                  | Ischemic stroke            | 0.74 (0.68 to 0.80)             | 0.02    | 649.21 (598.85 to 699.35)       | 0.04 (0.04 to 0.05)          | 0.04    | 37.39 (34.63 to 40.27)       |

**Table 3S National and regional disability-adjusted life years (DALYs) and deaths of non-communicable and cardiovascular diseases for 195 countries according to the GBD 2017 study.**

| Countries             | Cause                      | DALYs                        |         |                                 | Deaths                    |         |                              |
|-----------------------|----------------------------|------------------------------|---------|---------------------------------|---------------------------|---------|------------------------------|
|                       |                            | Number (thousand)            | Percent | Rate                            | Number (thousand)         | Percent | Rate                         |
|                       |                            | Mean (95% UI)                | Mean    | Mean (95% UI)                   | Mean (95% UI)             | Mean    | Mean (95% UI)                |
| Samoa                 | Hypertensive heart disease | 0.80 (0.64 to 0.91)          | 0.02    | 702.57 (556.67 to 796.61)       | 0.04 (0.03 to 0.05)       | 0.04    | 36.02 (27.88 to 40.79)       |
|                       | All causes                 | 50.05 (44.40 to 56.71)       | 1.00    | 25162.69 (22320.95 to 28509.59) | 1.08 (0.98 to 1.18)       | 1.00    | 544.82 (493.08 to 592.79)    |
|                       | Non-communicable diseases  | 35.66 (31.15 to 40.81)       | 0.71    | 17925.42 (15660.19 to 20515.72) | 0.88 (0.79 to 0.96)       | 0.81    | 440.11 (394.81 to 481.05)    |
|                       | Cardiovascular diseases    | 9.57 (8.45 to 10.61)         | 0.19    | 4811.28 (4250.39 to 5332.72)    | 0.41 (0.37 to 0.45)       | 0.38    | 206.59 (184.47 to 225.95)    |
|                       | Ischemic heart disease     | 4.37 (3.77 to 4.92)          | 0.09    | 2194.82 (1896.48 to 2473.17)    | 0.20 (0.18 to 0.23)       | 0.19    | 102.65 (90.09 to 114.38)     |
|                       | Stroke                     | 3.20 (2.79 to 3.61)          | 0.06    | 1610.05 (1401.82 to 1812.60)    | 0.14 (0.12 to 0.15)       | 0.13    | 68.26 (59.75 to 76.78)       |
|                       | Ischemic stroke            | 0.90 (0.77 to 1.03)          | 0.02    | 450.39 (384.66 to 517.10)       | 0.04 (0.03 to 0.05)       | 0.04    | 21.12 (17.58 to 24.69)       |
| Sao Tome and Principe | Hypertensive heart disease | 0.51 (0.37 to 0.64)          | 0.01    | 254.43 (187.64 to 323.44)       | 0.02 (0.02 to 0.03)       | 0.02    | 11.33 (8.18 to 14.37)        |
|                       | All causes                 | 58.25 (51.40 to 65.43)       | 1.00    | 29094.90 (25671.80 to 32683.42) | 1.05 (0.96 to 1.14)       | 1.00    | 525.80 (480.63 to 571.89)    |
|                       | Non-communicable diseases  | 34.12 (29.76 to 39.02)       | 0.59    | 17044.01 (14863.65 to 19490.01) | 0.70 (0.63 to 0.76)       | 0.66    | 347.23 (313.02 to 381.42)    |
|                       | Cardiovascular diseases    | 6.05 (5.35 to 6.79)          | 0.10    | 3020.02 (2670.88 to 3393.50)    | 0.24 (0.21 to 0.27)       | 0.23    | 118.99 (104.69 to 133.87)    |
|                       | Ischemic heart disease     | 2.20 (1.88 to 2.55)          | 0.04    | 1097.25 (939.01 to 1274.19)     | 0.10 (0.09 to 0.12)       | 0.10    | 51.39 (44.08 to 59.28)       |
|                       | Stroke                     | 2.27 (1.96 to 2.67)          | 0.04    | 1133.02 (979.67 to 1331.70)     | 0.09 (0.08 to 0.11)       | 0.09    | 45.30 (38.93 to 54.32)       |
|                       | Ischemic stroke            | 0.88 (0.73 to 1.07)          | 0.02    | 437.33 (365.53 to 535.63)       | 0.04 (0.03 to 0.05)       | 0.04    | 20.02 (16.64 to 25.00)       |
| Saudi Arabia          | Hypertensive heart disease | 0.12 (0.09 to 0.16)          | 0.00    | 61.57 (43.10 to 79.90)          | 0.00 (0.00 to 0.01)       | 0.00    | 2.17 (1.40 to 2.96)          |
|                       | All causes                 | 6939.82 (5894.88 to 8009.52) | 1.00    | 20148.10 (17114.37 to 23253.70) | 94.59 (85.54 to 105.51)   | 1.00    | 274.61 (248.33 to 306.34)    |
|                       | Non-communicable diseases  | 4945.28 (4107.18 to 5872.88) | 0.71    | 14357.42 (11924.21 to 17050.48) | 63.55 (58.01 to 70.99)    | 0.67    | 184.51 (168.43 to 206.10)    |
|                       | Cardiovascular diseases    | 915.42 (801.03 to 1052.26)   | 0.13    | 2657.71 (2325.60 to 3054.98)    | 31.57 (28.44 to 35.36)    | 0.33    | 91.65 (82.56 to 102.65)      |
|                       | Ischemic heart disease     | 566.02 (491.50 to 658.74)    | 0.08    | 1643.30 (1426.95 to 1912.48)    | 21.02 (18.86 to 23.62)    | 0.22    | 61.02 (54.75 to 68.56)       |
|                       | Stroke                     | 224.03 (191.81 to 259.65)    | 0.03    | 650.41 (556.86 to 753.82)       | 7.51 (6.68 to 8.50)       | 0.08    | 21.81 (19.39 to 24.69)       |
|                       | Ischemic stroke            | 95.32 (82.15 to 109.88)      | 0.01    | 276.73 (238.50 to 319.01)       | 3.45 (3.05 to 3.95)       | 0.04    | 10.01 (8.84 to 11.48)        |
| Senegal               | Hypertensive heart disease | 10.66 (8.43 to 14.03)        | 0.00    | 30.95 (24.48 to 40.72)          | 0.31 (0.25 to 0.43)       | 0.00    | 0.91 (0.72 to 1.24)          |
|                       | All causes                 | 5338.68 (4703.38 to 6118.30) | 1.00    | 36347.16 (32021.83 to 41654.98) | 87.60 (79.60 to 96.70)    | 1.00    | 596.40 (541.95 to 658.33)    |
|                       | Non-communicable diseases  | 2197.08 (1899.86 to 2513.50) | 0.41    | 14958.30 (12934.72 to 17112.56) | 41.84 (37.61 to 46.36)    | 0.48    | 284.87 (256.08 to 315.66)    |
|                       | Cardiovascular diseases    | 364.24 (320.87 to 410.98)    | 0.07    | 2479.83 (2184.59 to 2798.04)    | 14.79 (13.11 to 16.69)    | 0.17    | 100.72 (89.22 to 113.63)     |
|                       | Ischemic heart disease     | 155.33 (133.85 to 179.45)    | 0.03    | 1057.56 (911.31 to 1221.77)     | 7.20 (6.27 to 8.23)       | 0.08    | 49.01 (42.71 to 56.01)       |
|                       | Stroke                     | 133.65 (117.21 to 152.41)    | 0.03    | 909.91 (797.99 to 1037.67)      | 5.36 (4.68 to 6.12)       | 0.06    | 36.46 (31.88 to 41.69)       |
|                       | Ischemic stroke            | 43.35 (36.04 to 52.96)       | 0.01    | 295.16 (245.37 to 360.55)       | 1.96 (1.59 to 2.42)       | 0.02    | 13.33 (10.83 to 16.47)       |
| Serbia                | Hypertensive heart disease | 14.31 (8.05 to 21.74)        | 0.00    | 97.41 (54.79 to 148.01)         | 0.57 (0.31 to 0.87)       | 0.01    | 3.90 (2.13 to 5.94)          |
|                       | All causes                 | 3280.87 (2963.76 to 3655.68) | 1.00    | 36971.30 (33397.92 to 41194.98) | 123.69 (118.56 to 128.88) | 1.00    | 1393.78 (1335.97 to 1452.28) |
|                       | Non-communicable diseases  | 2832.37 (2573.34 to 3131.62) | 0.86    | 31917.26 (28998.28 to 35289.40) | 117.35 (112.51 to 122.37) | 0.95    | 1322.39 (1267.80 to 1378.94) |
|                       | Cardiovascular diseases    | 991.24 (936.32 to 1046.72)   | 0.30    | 11170.06 (10551.12 to 11795.27) | 67.12 (63.94 to 70.68)    | 0.54    | 756.31 (720.58 to 796.49)    |
|                       | Ischemic heart disease     | 438.51 (411.58 to 470.64)    | 0.13    | 4941.45 (4637.96 to 5303.53)    | 31.33 (29.52 to 33.62)    | 0.25    | 353.05 (332.71 to 378.85)    |
|                       | Stroke                     | 400.20 (372.82 to 429.17)    | 0.12    | 4509.75 (4201.19 to 4836.21)    | 26.26 (24.70 to 28.15)    | 0.21    | 295.92 (278.37 to 317.20)    |
|                       | Ischemic stroke            | 281.54 (259.28 to 304.37)    | 0.09    | 3172.60 (2921.73 to 3429.90)    | 19.41 (18.10 to 20.94)    | 0.16    | 218.73 (203.98 to 235.98)    |

**Table 3S National and regional disability-adjusted life years (DALYs) and deaths of non-communicable and cardiovascular diseases for 195 countries according to the GBD 2017 study.**

| Countries    | Cause                      | DALYs                        |         |                                 | Deaths                 |         |                            |
|--------------|----------------------------|------------------------------|---------|---------------------------------|------------------------|---------|----------------------------|
|              |                            | Number (thousand)            | Percent | Rate                            | Number (thousand)      | Percent | Rate                       |
|              |                            | Mean (95% UI)                | Mean    | Mean (95% UI)                   | Mean (95% UI)          | Mean    | Mean (95% UI)              |
| Seychelles   | Hypertensive heart disease | 32.93 (28.10 to 36.70)       | 0.01    | 371.03 (316.62 to 413.53)       | 2.68 (2.03 to 3.03)    | 0.02    | 30.19 (22.89 to 34.14)     |
|              | All causes                 | 29.45 (26.71 to 32.43)       | 1.00    | 29181.51 (26467.80 to 32138.33) | 0.76 (0.73 to 0.79)    | 1.00    | 755.70 (726.61 to 785.01)  |
|              | Non-communicable diseases  | 22.59 (20.17 to 25.30)       | 0.77    | 22390.69 (19988.64 to 25073.99) | 0.60 (0.57 to 0.62)    | 0.78    | 592.57 (568.82 to 615.91)  |
|              | Cardiovascular diseases    | 5.31 (5.03 to 5.59)          | 0.18    | 5258.54 (4983.14 to 5539.97)    | 0.24 (0.23 to 0.25)    | 0.31    | 233.90 (223.13 to 244.39)  |
|              | Ischemic heart disease     | 1.96 (1.82 to 2.10)          | 0.07    | 1941.54 (1802.85 to 2084.37)    | 0.09 (0.09 to 0.10)    | 0.12    | 92.30 (85.91 to 98.64)     |
|              | Stroke                     | 1.36 (1.26 to 1.48)          | 0.05    | 1352.30 (1244.03 to 1462.03)    | 0.06 (0.05 to 0.06)    | 0.07    | 54.52 (50.12 to 58.55)     |
|              | Ischemic stroke            | 0.53 (0.46 to 0.59)          | 0.02    | 521.76 (460.08 to 580.75)       | 0.02 (0.02 to 0.03)    | 0.03    | 23.50 (21.30 to 25.92)     |
| Sierra Leone | Hypertensive heart disease | 1.15 (0.93 to 1.37)          | 0.04    | 1139.26 (918.87 to 1358.10)     | 0.06 (0.05 to 0.07)    | 0.08    | 57.13 (46.94 to 68.79)     |
|              | All causes                 | 4820.57 (4170.33 to 5545.74) | 1.00    | 61567.32 (53262.64 to 70829.04) | 71.23 (63.05 to 80.33) | 1.00    | 909.70 (805.32 to 1025.91) |
|              | Non-communicable diseases  | 1357.74 (1171.02 to 1554.41) | 0.28    | 17340.77 (14955.99 to 19852.56) | 23.98 (21.07 to 27.38) | 0.34    | 306.24 (269.11 to 349.68)  |
|              | Cardiovascular diseases    | 261.83 (227.88 to 297.82)    | 0.05    | 3344.00 (2910.49 to 3803.73)    | 9.66 (8.45 to 11.03)   | 0.14    | 123.37 (107.92 to 140.92)  |
|              | Ischemic heart disease     | 108.05 (90.89 to 126.66)     | 0.02    | 1380.02 (1160.87 to 1617.72)    | 4.63 (3.97 to 5.37)    | 0.07    | 59.15 (50.64 to 68.59)     |
|              | Stroke                     | 93.79 (80.88 to 107.76)      | 0.02    | 1197.91 (1033.02 to 1376.30)    | 3.44 (2.97 to 3.98)    | 0.05    | 43.93 (37.99 to 50.86)     |
|              | Ischemic stroke            | 28.21 (24.20 to 32.64)       | 0.01    | 360.27 (309.12 to 416.82)       | 1.21 (1.03 to 1.40)    | 0.02    | 15.42 (13.13 to 17.94)     |
| Singapore    | Hypertensive heart disease | 10.10 (5.40 to 14.24)        | 0.00    | 129.06 (69.03 to 181.83)        | 0.39 (0.21 to 0.54)    | 0.01    | 4.95 (2.65 to 6.86)        |
|              | All causes                 | 958.20 (812.17 to 1128.01)   | 1.00    | 17207.64 (14585.14 to 20257.03) | 19.84 (18.86 to 20.90) | 1.00    | 356.30 (338.74 to 375.30)  |
|              | Non-communicable diseases  | 769.74 (647.34 to 910.12)    | 0.80    | 13823.08 (11624.98 to 16344.15) | 15.96 (15.19 to 16.83) | 0.80    | 286.59 (272.76 to 302.24)  |
|              | Cardiovascular diseases    | 135.04 (125.08 to 145.27)    | 0.14    | 2425.08 (2246.25 to 2608.77)    | 6.16 (5.85 to 6.51)    | 0.31    | 110.64 (104.99 to 116.94)  |
|              | Ischemic heart disease     | 64.13 (58.91 to 70.32)       | 0.07    | 1151.65 (1057.84 to 1262.73)    | 3.46 (3.24 to 3.71)    | 0.17    | 62.17 (58.14 to 66.64)     |
|              | Stroke                     | 38.64 (33.77 to 43.19)       | 0.04    | 693.95 (606.54 to 775.58)       | 1.46 (1.37 to 1.57)    | 0.07    | 26.21 (24.65 to 28.17)     |
|              | Ischemic stroke            | 17.34 (14.33 to 20.31)       | 0.02    | 311.33 (257.36 to 364.71)       | 0.62 (0.57 to 0.66)    | 0.03    | 11.07 (10.17 to 11.93)     |
| Slovakia     | Hypertensive heart disease | 13.00 (6.64 to 15.01)        | 0.01    | 233.37 (119.16 to 269.53)       | 0.61 (0.37 to 0.69)    | 0.03    | 10.90 (6.58 to 12.41)      |
|              | All causes                 | 1734.67 (1538.29 to 1953.95) | 1.00    | 32009.70 (28385.88 to 36055.94) | 52.78 (50.41 to 55.29) | 1.00    | 973.98 (930.21 to 1020.20) |
|              | Non-communicable diseases  | 1439.70 (1284.21 to 1615.95) | 0.83    | 26566.63 (23697.31 to 29818.88) | 48.10 (45.93 to 50.42) | 0.91    | 887.65 (847.47 to 930.48)  |
|              | Cardiovascular diseases    | 427.83 (400.59 to 459.02)    | 0.25    | 7894.76 (7392.04 to 8470.30)    | 25.22 (23.98 to 26.66) | 0.48    | 465.30 (442.47 to 491.96)  |
|              | Ischemic heart disease     | 246.14 (231.26 to 266.58)    | 0.14    | 4541.92 (4267.46 to 4919.18)    | 16.89 (15.98 to 17.98) | 0.32    | 311.58 (294.88 to 331.76)  |
|              | Stroke                     | 105.67 (96.60 to 115.79)     | 0.06    | 1950.00 (1782.59 to 2136.73)    | 5.21 (4.84 to 5.63)    | 0.10    | 96.11 (89.38 to 103.91)    |
|              | Ischemic stroke            | 69.11 (62.08 to 76.20)       | 0.04    | 1275.36 (1145.59 to 1406.14)    | 3.46 (3.21 to 3.76)    | 0.07    | 63.92 (59.17 to 69.41)     |
| Slovenia     | Hypertensive heart disease | 15.93 (10.53 to 18.19)       | 0.01    | 293.94 (194.38 to 335.67)       | 0.96 (0.60 to 1.11)    | 0.02    | 17.71 (11.03 to 20.56)     |
|              | All causes                 | 622.87 (545.28 to 714.10)    | 1.00    | 30107.05 (26356.54 to 34516.85) | 19.90 (18.85 to 21.04) | 1.00    | 962.08 (911.26 to 1016.97) |
|              | Non-communicable diseases  | 506.04 (446.04 to 576.24)    | 0.81    | 24459.66 (21559.97 to 27853.20) | 17.86 (16.91 to 18.87) | 0.90    | 863.42 (817.23 to 912.30)  |
|              | Cardiovascular diseases    | 108.14 (100.71 to 116.51)    | 0.17    | 5226.92 (4868.09 to 5631.49)    | 7.45 (7.03 to 7.93)    | 0.37    | 360.11 (340.00 to 383.34)  |
|              | Ischemic heart disease     | 44.54 (41.11 to 49.08)       | 0.07    | 2153.01 (1987.30 to 2372.56)    | 3.35 (3.10 to 3.84)    | 0.17    | 162.11 (149.73 to 185.54)  |
|              | Stroke                     | 30.64 (27.93 to 33.52)       | 0.05    | 1481.05 (1350.07 to 1620.43)    | 1.89 (1.74 to 2.15)    | 0.10    | 91.41 (84.10 to 104.13)    |
|              | Ischemic stroke            | 18.18 (16.12 to 20.15)       | 0.03    | 878.78 (779.07 to 973.99)       | 1.12 (1.02 to 1.28)    | 0.06    | 54.12 (49.39 to 62.07)     |
|              | Hypertensive heart disease | 7.00 (4.25 to 8.05)          | 0.01    | 338.16 (205.41 to 388.91)       | 0.61 (0.26 to 0.72)    | 0.03    | 29.35 (12.47 to 34.77)     |



**Table 3S National and regional disability-adjusted life years (DALYs) and deaths of non-communicable and cardiovascular diseases for 195 countries according to the GBD 2017 study.**

| Countries       | Cause                      | DALYs                           |         |                                 | Deaths                    |         |                            |
|-----------------|----------------------------|---------------------------------|---------|---------------------------------|---------------------------|---------|----------------------------|
|                 |                            | Number (thousand)               | Percent | Rate                            | Number (thousand)         | Percent | Rate                       |
|                 |                            | Mean (95% UI)                   | Mean    | Mean (95% UI)                   | Mean (95% UI)             | Mean    | Mean (95% UI)              |
| Solomon Islands | All causes                 | 225.44 (199.94 to 252.07)       | 1.00    | 35356.97 (31358.63 to 39534.31) | 4.13 (3.71 to 4.59)       | 1.00    | 648.02 (582.28 to 719.92)  |
|                 | Non-communicable diseases  | 126.84 (110.50 to 144.08)       | 0.56    | 19892.90 (17330.99 to 22596.60) | 2.63 (2.35 to 2.92)       | 0.64    | 412.69 (368.91 to 457.89)  |
|                 | Cardiovascular diseases    | 36.46 (31.97 to 40.98)          | 0.16    | 5717.50 (5013.77 to 6426.83)    | 1.26 (1.13 to 1.40)       | 0.31    | 198.17 (177.07 to 219.98)  |
|                 | Ischemic heart disease     | 18.37 (15.90 to 20.91)          | 0.08    | 2880.52 (2493.69 to 3279.51)    | 0.66 (0.58 to 0.74)       | 0.16    | 103.55 (91.53 to 115.77)   |
|                 | Stroke                     | 11.83 (10.37 to 13.28)          | 0.05    | 1855.95 (1626.99 to 2083.28)    | 0.43 (0.38 to 0.48)       | 0.10    | 67.03 (59.95 to 74.76)     |
|                 | Ischemic stroke            | 2.94 (2.53 to 3.44)             | 0.01    | 460.91 (397.16 to 538.89)       | 0.12 (0.10 to 0.14)       | 0.03    | 18.53 (15.70 to 21.82)     |
|                 | Hypertensive heart disease | 1.41 (0.85 to 1.73)             | 0.01    | 221.03 (133.66 to 271.96)       | 0.05 (0.03 to 0.06)       | 0.01    | 8.13 (5.03 to 9.94)        |
| Somalia         | All causes                 | 9844.82 (8045.64 to 12252.13)   | 1.00    | 58321.04 (47662.68 to 72582.04) | 145.66 (115.65 to 185.44) | 1.00    | 862.87 (685.14 to 1098.54) |
|                 | Non-communicable diseases  | 2574.17 (2107.51 to 3112.85)    | 0.26    | 15249.45 (12484.97 to 18440.66) | 46.45 (36.04 to 58.22)    | 0.32    | 275.18 (213.53 to 344.91)  |
|                 | Cardiovascular diseases    | 517.26 (403.17 to 654.52)       | 0.05    | 3064.29 (2388.39 to 3877.41)    | 18.05 (14.14 to 22.58)    | 0.12    | 106.92 (83.80 to 133.74)   |
|                 | Ischemic heart disease     | 207.38 (157.37 to 270.11)       | 0.02    | 1228.55 (932.29 to 1600.17)     | 7.85 (6.00 to 10.08)      | 0.05    | 46.53 (35.57 to 59.69)     |
|                 | Stroke                     | 187.77 (141.22 to 238.45)       | 0.02    | 1112.37 (836.59 to 1412.58)     | 6.80 (5.10 to 8.65)       | 0.05    | 40.31 (30.22 to 51.22)     |
|                 | Ischemic stroke            | 48.69 (34.79 to 67.56)          | 0.00    | 288.45 (206.10 to 400.22)       | 1.99 (1.37 to 2.85)       | 0.01    | 11.81 (8.13 to 16.86)      |
|                 | Hypertensive heart disease | 40.48 (22.18 to 68.88)          | 0.00    | 239.82 (131.39 to 408.05)       | 1.65 (0.88 to 2.89)       | 0.01    | 9.75 (5.24 to 17.09)       |
| South Africa    | All causes                 | 24022.71 (22314.42 to 26071.54) | 1.00    | 43715.12 (40606.47 to 47443.46) | 475.37 (458.47 to 495.03) | 1.00    | 865.05 (834.29 to 900.83)  |
|                 | Non-communicable diseases  | 9432.85 (8272.79 to 10771.13)   | 0.39    | 17165.36 (15054.33 to 19600.67) | 211.38 (204.41 to 216.53) | 0.44    | 384.65 (371.98 to 394.03)  |
|                 | Cardiovascular diseases    | 1679.42 (1611.02 to 1756.40)    | 0.07    | 3056.11 (2931.64 to 3196.20)    | 76.67 (74.19 to 79.87)    | 0.16    | 139.52 (135.01 to 145.34)  |
|                 | Ischemic heart disease     | 650.67 (618.92 to 687.08)       | 0.03    | 1184.05 (1126.27 to 1250.31)    | 31.90 (30.43 to 33.63)    | 0.07    | 58.05 (55.38 to 61.20)     |
|                 | Stroke                     | 546.65 (514.69 to 580.71)       | 0.02    | 994.76 (936.61 to 1056.73)      | 25.03 (23.72 to 26.51)    | 0.05    | 45.56 (43.17 to 48.25)     |
|                 | Ischemic stroke            | 171.99 (156.74 to 186.60)       | 0.01    | 312.98 (285.22 to 339.56)       | 8.59 (8.10 to 9.18)       | 0.02    | 15.64 (14.74 to 16.70)     |
|                 | Hypertensive heart disease | 185.84 (168.23 to 213.45)       | 0.01    | 338.17 (306.13 to 388.42)       | 9.66 (8.62 to 10.78)      | 0.02    | 17.58 (15.68 to 19.62)     |
| South Korea     | All causes                 | 11871.12 (10281.67 to 13804.61) | 1.00    | 22538.36 (19520.65 to 26209.27) | 299.61 (284.40 to 315.10) | 1.00    | 568.85 (539.95 to 598.24)  |
|                 | Non-communicable diseases  | 9556.66 (8209.31 to 11177.83)   | 0.80    | 18144.15 (15586.08 to 21222.08) | 249.40 (236.97 to 262.52) | 0.83    | 473.50 (449.91 to 498.41)  |
|                 | Cardiovascular diseases    | 1232.83 (1129.95 to 1335.06)    | 0.10    | 2340.64 (2145.31 to 2534.74)    | 66.79 (62.28 to 71.36)    | 0.22    | 126.80 (118.25 to 135.49)  |
|                 | Ischemic heart disease     | 370.89 (342.79 to 401.98)       | 0.03    | 704.17 (650.81 to 763.20)       | 24.75 (22.88 to 26.73)    | 0.08    | 47.00 (43.44 to 50.75)     |
|                 | Stroke                     | 619.78 (560.89 to 677.70)       | 0.05    | 1176.71 (1064.90 to 1286.67)    | 30.66 (28.30 to 33.05)    | 0.10    | 58.21 (53.73 to 62.75)     |
|                 | Ischemic stroke            | 308.63 (268.23 to 346.40)       | 0.03    | 585.97 (509.26 to 657.68)       | 15.53 (14.15 to 16.87)    | 0.05    | 29.49 (26.87 to 32.03)     |
|                 | Hypertensive heart disease | 58.96 (49.55 to 87.12)          | 0.00    | 111.95 (94.08 to 165.41)        | 4.14 (3.44 to 6.28)       | 0.01    | 7.87 (6.54 to 11.92)       |
| South Sudan     | All causes                 | 7064.92 (6021.44 to 8298.79)    | 1.00    | 71068.46 (60571.70 to 83480.35) | 97.28 (82.43 to 116.21)   | 1.00    | 978.56 (829.17 to 1169.05) |
|                 | Non-communicable diseases  | 1470.29 (1236.33 to 1759.88)    | 0.21    | 14790.16 (12436.70 to 17703.27) | 24.97 (19.80 to 31.68)    | 0.26    | 251.19 (199.17 to 318.67)  |
|                 | Cardiovascular diseases    | 240.65 (190.30 to 307.55)       | 0.03    | 2420.77 (1914.26 to 3093.75)    | 8.42 (6.60 to 10.65)      | 0.09    | 84.72 (66.35 to 107.15)    |
|                 | Ischemic heart disease     | 89.07 (66.70 to 117.12)         | 0.01    | 896.00 (670.92 to 1178.13)      | 3.52 (2.68 to 4.57)       | 0.04    | 35.42 (26.97 to 45.94)     |
|                 | Stroke                     | 85.54 (67.13 to 110.89)         | 0.01    | 860.47 (675.25 to 1115.45)      | 3.16 (2.45 to 4.07)       | 0.03    | 31.82 (24.67 to 40.92)     |
|                 | Ischemic stroke            | 21.37 (15.70 to 29.09)          | 0.00    | 214.97 (157.97 to 292.59)       | 0.91 (0.64 to 1.27)       | 0.01    | 9.15 (6.42 to 12.80)       |
|                 | Hypertensive heart disease | 17.87 (9.45 to 29.61)           | 0.00    | 179.79 (95.11 to 297.82)        | 0.76 (0.40 to 1.27)       | 0.01    | 7.63 (4.06 to 12.77)       |
| Spain           | All causes                 | 11701.35 (10191.15 to 13433.48) | 1.00    | 25224.30 (21968.80 to 28958.21) | 416.52 (400.32 to 432.61) | 1.00    | 897.88 (862.97 to 932.57)  |

**Table 3S National and regional disability-adjusted life years (DALYs) and deaths of non-communicable and cardiovascular diseases for 195 countries according to the GBD 2017 study.**

| Countries | Cause                      | DALYs                           |         |                                 | Deaths                    |         |                            |
|-----------|----------------------------|---------------------------------|---------|---------------------------------|---------------------------|---------|----------------------------|
|           |                            | Number (thousand)               | Percent | Rate                            | Number (thousand)         | Percent | Rate                       |
|           |                            | Mean (95% UI)                   | Mean    | Mean (95% UI)                   | Mean (95% UI)             | Mean    | Mean (95% UI)              |
| Sri Lanka | Non-communicable diseases  | 10268.13 (8967.45 to 11777.18)  | 0.88    | 22134.74 (19330.90 to 25387.75) | 384.88 (369.75 to 400.17) | 0.92    | 829.67 (797.05 to 862.64)  |
|           | Cardiovascular diseases    | 1681.34 (1566.88 to 1789.85)    | 0.14    | 3624.41 (3377.68 to 3858.33)    | 123.58 (117.64 to 129.94) | 0.30    | 266.39 (253.58 to 280.10)  |
|           | Ischemic heart disease     | 697.28 (654.27 to 744.93)       | 0.06    | 1503.10 (1410.38 to 1605.82)    | 55.23 (51.91 to 59.57)    | 0.13    | 119.07 (111.91 to 128.42)  |
|           | Stroke                     | 459.10 (416.81 to 499.90)       | 0.04    | 989.68 (898.51 to 1077.61)      | 32.38 (30.22 to 35.27)    | 0.08    | 69.81 (65.14 to 76.03)     |
|           | Ischemic stroke            | 232.77 (203.85 to 260.13)       | 0.02    | 501.77 (439.44 to 560.75)       | 16.45 (15.23 to 17.95)    | 0.04    | 35.46 (32.84 to 38.70)     |
|           | Hypertensive heart disease | 56.85 (33.16 to 65.02)          | 0.00    | 122.54 (71.47 to 140.17)        | 5.94 (2.17 to 7.06)       | 0.01    | 12.81 (4.67 to 15.21)      |
|           | All causes                 | 5169.41 (4480.18 to 6014.39)    | 1.00    | 23936.38 (20745.00 to 27849.01) | 126.00 (109.30 to 142.48) | 1.00    | 583.41 (506.11 to 659.75)  |
|           | Non-communicable diseases  | 3983.50 (3395.85 to 4671.21)    | 0.77    | 18445.19 (15724.14 to 21629.56) | 102.39 (88.53 to 115.51)  | 0.81    | 474.10 (409.95 to 534.86)  |
|           | Cardiovascular diseases    | 888.83 (771.59 to 1013.01)      | 0.17    | 4115.61 (3572.75 to 4690.65)    | 41.87 (36.25 to 47.25)    | 0.33    | 193.86 (167.85 to 218.77)  |
|           | Ischemic heart disease     | 466.01 (397.00 to 538.49)       | 0.09    | 2157.83 (1838.27 to 2493.41)    | 23.42 (20.26 to 26.78)    | 0.19    | 108.43 (93.83 to 123.99)   |
| Sudan     | Stroke                     | 243.28 (210.76 to 278.00)       | 0.05    | 1126.49 (975.90 to 1287.24)     | 11.71 (10.03 to 13.32)    | 0.09    | 54.22 (46.43 to 61.68)     |
|           | Ischemic stroke            | 131.62 (113.01 to 149.16)       | 0.03    | 609.43 (523.26 to 690.68)       | 6.97 (5.97 to 7.90)       | 0.06    | 32.27 (27.63 to 36.58)     |
|           | Hypertensive heart disease | 39.43 (23.39 to 50.39)          | 0.01    | 182.58 (108.32 to 233.33)       | 1.83 (1.07 to 2.33)       | 0.01    | 8.48 (4.97 to 10.80)       |
|           | All causes                 | 14301.44 (12477.75 to 16437.46) | 1.00    | 35526.64 (30996.35 to 40832.77) | 209.01 (183.23 to 236.53) | 1.00    | 519.20 (455.16 to 587.58)  |
|           | Non-communicable diseases  | 7347.28 (6296.44 to 8521.57)    | 0.51    | 18251.59 (15641.18 to 21168.69) | 125.60 (108.38 to 142.91) | 0.60    | 312.01 (269.22 to 355.00)  |
|           | Cardiovascular diseases    | 1749.53 (1474.84 to 2047.22)    | 0.12    | 4346.07 (3663.70 to 5085.57)    | 69.01 (58.02 to 80.48)    | 0.33    | 171.43 (144.14 to 199.93)  |
|           | Ischemic heart disease     | 963.47 (776.97 to 1172.03)      | 0.07    | 2393.40 (1930.08 to 2911.48)    | 41.75 (34.03 to 50.20)    | 0.20    | 103.71 (84.53 to 124.71)   |
|           | Stroke                     | 480.57 (391.51 to 580.50)       | 0.03    | 1193.79 (972.55 to 1442.04)     | 18.20 (14.35 to 22.46)    | 0.09    | 45.22 (35.64 to 55.80)     |
|           | Ischemic stroke            | 244.94 (199.41 to 298.44)       | 0.02    | 608.46 (495.36 to 741.37)       | 11.02 (8.70 to 13.63)     | 0.05    | 27.37 (21.61 to 33.85)     |
|           | Hypertensive heart disease | 93.37 (41.11 to 129.49)         | 0.01    | 231.94 (102.11 to 321.68)       | 4.48 (1.83 to 6.42)       | 0.02    | 11.14 (4.54 to 15.96)      |
| Suriname  | All causes                 | 186.20 (167.17 to 207.64)       | 1.00    | 32526.55 (29201.41 to 36272.13) | 4.30 (3.95 to 4.64)       | 1.00    | 750.74 (689.30 to 810.25)  |
|           | Non-communicable diseases  | 128.25 (113.57 to 144.61)       | 0.69    | 22403.50 (19839.32 to 25260.17) | 3.29 (3.02 to 3.56)       | 0.76    | 574.23 (526.80 to 621.93)  |
|           | Cardiovascular diseases    | 31.12 (28.29 to 33.91)          | 0.17    | 5436.46 (4941.25 to 5924.01)    | 1.40 (1.27 to 1.51)       | 0.32    | 243.79 (222.35 to 264.50)  |
|           | Ischemic heart disease     | 12.63 (11.23 to 13.97)          | 0.07    | 2205.71 (1961.99 to 2439.46)    | 0.59 (0.53 to 0.64)       | 0.14    | 102.43 (92.11 to 111.86)   |
|           | Stroke                     | 11.93 (10.73 to 13.07)          | 0.06    | 2084.62 (1874.25 to 2282.89)    | 0.55 (0.50 to 0.60)       | 0.13    | 96.27 (86.98 to 105.10)    |
|           | Ischemic stroke            | 3.13 (2.80 to 3.46)             | 0.02    | 547.42 (489.92 to 604.58)       | 0.17 (0.15 to 0.18)       | 0.04    | 29.03 (25.86 to 32.10)     |
|           | Hypertensive heart disease | 2.22 (1.88 to 2.88)             | 0.01    | 388.04 (328.25 to 503.67)       | 0.11 (0.09 to 0.14)       | 0.03    | 18.83 (15.91 to 25.20)     |
| Swaziland | All causes                 | 576.62 (520.67 to 641.32)       | 1.00    | 51280.62 (46304.67 to 57035.05) | 10.12 (9.05 to 11.33)     | 1.00    | 900.40 (805.04 to 1007.19) |
|           | Non-communicable diseases  | 197.35 (170.88 to 228.04)       | 0.34    | 17551.21 (15196.64 to 20280.26) | 4.10 (3.47 to 4.83)       | 0.40    | 364.37 (308.18 to 429.38)  |
|           | Cardiovascular diseases    | 37.64 (31.29 to 44.47)          | 0.07    | 3347.09 (2782.43 to 3954.47)    | 1.46 (1.21 to 1.75)       | 0.14    | 130.28 (107.76 to 155.65)  |
|           | Ischemic heart disease     | 14.21 (11.39 to 17.13)          | 0.02    | 1263.76 (1012.99 to 1523.33)    | 0.60 (0.48 to 0.72)       | 0.06    | 53.31 (43.11 to 64.30)     |
|           | Stroke                     | 13.76 (11.27 to 16.66)          | 0.02    | 1223.78 (1002.69 to 1481.28)    | 0.56 (0.45 to 0.68)       | 0.05    | 49.42 (40.18 to 60.42)     |
|           | Ischemic stroke            | 3.52 (2.84 to 4.36)             | 0.01    | 313.42 (252.96 to 387.35)       | 0.16 (0.13 to 0.21)       | 0.02    | 14.49 (11.33 to 18.26)     |
|           | Hypertensive heart disease | 3.29 (2.23 to 4.50)             | 0.01    | 292.35 (198.51 to 400.35)       | 0.14 (0.09 to 0.19)       | 0.01    | 12.22 (8.39 to 16.69)      |
| Sweden    | All causes                 | 2615.62 (2257.67 to 3007.73)    | 1.00    | 26039.04 (22475.58 to 29942.53) | 91.94 (88.31 to 95.50)    | 1.00    | 915.29 (879.15 to 950.76)  |
|           | Non-communicable diseases  | 2270.82 (1964.53 to 2616.43)    | 0.87    | 22606.46 (19557.25 to 26047.06) | 83.21 (79.94 to 86.46)    | 0.91    | 828.38 (795.84 to 860.73)  |



**Table 3S National and regional disability-adjusted life years (DALYs) and deaths of non-communicable and cardiovascular diseases for 195 countries according to the GBD 2017 study.**

| Countries                  | Cause                      | DALYs                           |         |                                 | Deaths                    |         |                           |
|----------------------------|----------------------------|---------------------------------|---------|---------------------------------|---------------------------|---------|---------------------------|
|                            |                            | Number (thousand)               | Percent | Rate                            | Number (thousand)         | Percent | Rate                      |
|                            |                            | Mean (95% UI)                   | Mean    | Mean (95% UI)                   | Mean (95% UI)             | Mean    | Mean (95% UI)             |
| Switzerland                | Cardiovascular diseases    | 452.31 (423.09 to 482.38)       | 0.17    | 4502.84 (4211.99 to 4802.16)    | 34.16 (32.67 to 35.73)    | 0.37    | 340.11 (325.24 to 355.66) |
|                            | Ischemic heart disease     | 220.26 (206.72 to 239.68)       | 0.08    | 2192.73 (2057.98 to 2386.07)    | 18.32 (17.26 to 20.22)    | 0.20    | 182.35 (171.80 to 201.25) |
|                            | Stroke                     | 109.30 (99.46 to 119.70)        | 0.04    | 1088.10 (990.16 to 1191.63)     | 7.62 (7.11 to 8.50)       | 0.08    | 75.89 (70.76 to 84.58)    |
|                            | Ischemic stroke            | 66.07 (58.56 to 73.82)          | 0.03    | 657.78 (582.95 to 734.93)       | 4.62 (4.28 to 5.19)       | 0.05    | 46.02 (42.60 to 51.70)    |
|                            | Hypertensive heart disease | 12.76 (5.42 to 14.97)           | 0.00    | 127.01 (53.94 to 148.99)        | 1.24 (0.29 to 1.48)       | 0.01    | 12.37 (2.89 to 14.78)     |
|                            | All causes                 | 2067.72 (1763.99 to 2406.03)    | 1.00    | 24062.56 (20528.01 to 27999.58) | 64.57 (61.60 to 67.41)    | 1.00    | 751.36 (716.89 to 784.41) |
|                            | Non-communicable diseases  | 1784.21 (1519.12 to 2080.14)    | 0.86    | 20763.30 (17678.44 to 24207.17) | 58.23 (55.54 to 60.81)    | 0.90    | 677.59 (646.33 to 707.64) |
|                            | Cardiovascular diseases    | 266.11 (246.91 to 284.44)       | 0.13    | 3096.77 (2873.33 to 3310.10)    | 21.28 (20.16 to 22.41)    | 0.33    | 247.64 (234.63 to 260.81) |
|                            | Ischemic heart disease     | 125.57 (115.65 to 138.54)       | 0.06    | 1461.34 (1345.85 to 1612.20)    | 11.36 (10.52 to 12.85)    | 0.18    | 132.20 (122.42 to 149.54) |
| Syria                      | Stroke                     | 59.82 (53.41 to 66.13)          | 0.03    | 696.17 (621.50 to 769.56)       | 4.19 (3.82 to 4.83)       | 0.06    | 48.80 (44.48 to 56.20)    |
|                            | Ischemic stroke            | 35.93 (31.17 to 40.72)          | 0.02    | 418.14 (362.70 to 473.89)       | 2.54 (2.28 to 2.99)       | 0.04    | 29.52 (26.50 to 34.80)    |
|                            | Hypertensive heart disease | 13.84 (6.39 to 16.10)           | 0.01    | 161.07 (74.33 to 187.33)        | 1.54 (0.38 to 1.86)       | 0.02    | 17.95 (4.43 to 21.66)     |
|                            | All causes                 | 6453.50 (5891.79 to 7065.43)    | 1.00    | 35593.37 (32495.32 to 38968.39) | 114.38 (105.92 to 124.49) | 1.00    | 630.86 (584.17 to 686.60) |
|                            | Non-communicable diseases  | 3120.84 (2673.41 to 3606.35)    | 0.48    | 17212.57 (14744.82 to 19890.33) | 64.82 (57.04 to 73.60)    | 0.57    | 357.48 (314.59 to 405.94) |
|                            | Cardiovascular diseases    | 992.52 (857.72 to 1141.83)      | 0.15    | 5474.12 (4730.61 to 6297.60)    | 41.38 (36.30 to 47.24)    | 0.36    | 228.23 (200.19 to 260.56) |
|                            | Ischemic heart disease     | 696.88 (596.49 to 812.91)       | 0.11    | 3843.57 (3289.85 to 4483.50)    | 31.19 (27.24 to 35.79)    | 0.27    | 172.05 (150.24 to 197.42) |
|                            | Stroke                     | 205.39 (177.54 to 232.98)       | 0.03    | 1132.81 (979.22 to 1284.99)     | 7.54 (6.56 to 8.57)       | 0.07    | 41.59 (36.19 to 47.26)    |
|                            | Ischemic stroke            | 80.16 (69.72 to 90.43)          | 0.01    | 442.09 (384.52 to 498.73)       | 3.33 (2.89 to 3.78)       | 0.03    | 18.36 (15.94 to 20.84)    |
| Taiwan (Province of China) | Hypertensive heart disease | 10.94 (9.23 to 13.30)           | 0.00    | 60.33 (50.91 to 73.36)          | 0.44 (0.37 to 0.61)       | 0.00    | 2.44 (2.03 to 3.35)       |
|                            | All causes                 | 6186.11 (5492.68 to 6957.78)    | 1.00    | 26231.09 (23290.73 to 29503.23) | 179.64 (172.53 to 187.21) | 1.00    | 761.72 (731.58 to 793.82) |
|                            | Non-communicable diseases  | 5224.54 (4612.72 to 5913.88)    | 0.84    | 22153.71 (19559.42 to 25076.75) | 151.28 (145.32 to 157.59) | 0.84    | 641.46 (616.19 to 668.25) |
|                            | Cardiovascular diseases    | 818.45 (758.64 to 879.62)       | 0.13    | 3470.50 (3216.90 to 3729.89)    | 40.53 (38.79 to 42.54)    | 0.23    | 171.85 (164.49 to 180.39) |
|                            | Ischemic heart disease     | 292.80 (277.13 to 310.96)       | 0.05    | 1241.57 (1175.10 to 1318.56)    | 17.90 (16.97 to 18.94)    | 0.10    | 75.91 (71.94 to 80.30)    |
|                            | Stroke                     | 320.91 (289.56 to 350.21)       | 0.05    | 1360.76 (1227.82 to 1485.02)    | 13.75 (13.00 to 14.51)    | 0.08    | 58.32 (55.13 to 61.54)    |
|                            | Ischemic stroke            | 132.57 (111.88 to 152.24)       | 0.02    | 562.16 (474.42 to 645.54)       | 5.33 (4.98 to 5.69)       | 0.03    | 22.59 (21.11 to 24.12)    |
|                            | Hypertensive heart disease | 57.88 (51.02 to 69.54)          | 0.01    | 245.43 (216.35 to 294.86)       | 3.45 (2.94 to 4.42)       | 0.02    | 14.65 (12.49 to 18.74)    |
|                            | All causes                 | 2908.87 (2599.89 to 3266.66)    | 1.00    | 31468.63 (28125.99 to 35339.27) | 47.99 (44.71 to 51.39)    | 1.00    | 519.21 (483.67 to 555.97) |
| Tajikistan                 | Non-communicable diseases  | 1559.78 (1378.58 to 1764.97)    | 0.54    | 16873.93 (14913.67 to 19093.67) | 32.81 (30.56 to 35.08)    | 0.68    | 354.98 (330.58 to 379.50) |
|                            | Cardiovascular diseases    | 424.40 (390.23 to 460.18)       | 0.15    | 4591.23 (4221.61 to 4978.28)    | 18.27 (16.95 to 19.66)    | 0.38    | 197.63 (183.42 to 212.68) |
|                            | Ischemic heart disease     | 244.42 (223.32 to 266.40)       | 0.08    | 2644.19 (2415.89 to 2881.99)    | 11.32 (10.49 to 12.25)    | 0.24    | 122.49 (113.49 to 132.57) |
|                            | Stroke                     | 121.20 (110.74 to 132.26)       | 0.04    | 1311.13 (1198.05 to 1430.77)    | 4.83 (4.45 to 5.27)       | 0.10    | 52.25 (48.09 to 57.00)    |
|                            | Ischemic stroke            | 35.60 (31.06 to 40.44)          | 0.01    | 385.12 (336.06 to 437.48)       | 1.51 (1.33 to 1.71)       | 0.03    | 16.32 (14.40 to 18.52)    |
|                            | Hypertensive heart disease | 30.47 (24.33 to 34.29)          | 0.01    | 329.61 (263.18 to 370.92)       | 1.38 (1.06 to 1.55)       | 0.03    | 14.95 (11.49 to 16.75)    |
|                            | All causes                 | 22689.18 (20028.87 to 26046.90) | 1.00    | 42037.92 (37108.96 to 48259.00) | 342.55 (311.49 to 378.89) | 1.00    | 634.67 (577.12 to 702.01) |
|                            | Non-communicable diseases  | 8362.61 (7243.08 to 9589.42)    | 0.37    | 15494.01 (13419.79 to 17767.03) | 141.61 (127.92 to 156.38) | 0.41    | 262.38 (237.00 to 289.74) |
|                            | Cardiovascular diseases    | 1099.23 (976.09 to 1229.07)     | 0.05    | 2036.63 (1808.47 to 2277.19)    | 44.17 (38.96 to 49.72)    | 0.13    | 81.85 (72.18 to 92.12)    |
| Tanzania                   |                            |                                 |         |                                 |                           |         |                           |

**Table 3S National and regional disability-adjusted life years (DALYs) and deaths of non-communicable and cardiovascular diseases for 195 countries according to the GBD 2017 study.**

| Countries   | Cause                      | DALYs                           |         |                                 | Deaths                    |         |                           |
|-------------|----------------------------|---------------------------------|---------|---------------------------------|---------------------------|---------|---------------------------|
|             |                            | Number (thousand)               | Percent | Rate                            | Number (thousand)         | Percent | Rate                      |
|             |                            | Mean (95% UI)                   | Mean    | Mean (95% UI)                   | Mean (95% UI)             | Mean    | Mean (95% UI)             |
| Thailand    | Ischemic heart disease     | 454.24 (383.84 to 534.54)       | 0.02    | 841.61 (711.16 to 990.39)       | 20.52 (17.29 to 24.23)    | 0.06    | 38.02 (32.03 to 44.89)    |
|             | Stroke                     | 326.66 (279.06 to 378.45)       | 0.01    | 605.22 (517.04 to 701.18)       | 13.35 (11.15 to 15.80)    | 0.04    | 24.74 (20.66 to 29.28)    |
|             | Ischemic stroke            | 115.43 (89.20 to 141.50)        | 0.01    | 213.87 (165.26 to 262.17)       | 5.36 (3.99 to 6.78)       | 0.02    | 9.93 (7.39 to 12.55)      |
|             | Hypertensive heart disease | 95.76 (52.53 to 132.81)         | 0.00    | 177.42 (97.33 to 246.06)        | 4.90 (2.61 to 7.13)       | 0.01    | 9.08 (4.84 to 13.21)      |
|             | All causes                 | 19531.73 (17341.60 to 21992.88) | 1.00    | 27655.14 (24554.10 to 31139.89) | 467.23 (429.81 to 503.47) | 1.00    | 661.55 (608.58 to 712.87) |
|             | Non-communicable diseases  | 14180.05 (12379.98 to 16268.06) | 0.73    | 20077.65 (17528.92 to 23034.07) | 344.26 (314.22 to 373.01) | 0.74    | 487.44 (444.91 to 528.15) |
|             | Cardiovascular diseases    | 2421.63 (2190.33 to 2688.61)    | 0.12    | 3428.80 (3101.30 to 3806.83)    | 102.58 (93.66 to 113.84)  | 0.22    | 145.25 (132.61 to 161.19) |
|             | Ischemic heart disease     | 882.34 (791.87 to 992.60)       | 0.05    | 1249.32 (1121.21 to 1405.43)    | 44.72 (40.54 to 50.04)    | 0.10    | 63.32 (57.40 to 70.86)    |
| The Bahamas | Stroke                     | 1072.27 (966.45 to 1198.68)     | 0.05    | 1518.24 (1368.40 to 1697.22)    | 43.05 (38.92 to 48.37)    | 0.09    | 60.96 (55.11 to 68.48)    |
|             | Ischemic stroke            | 364.61 (319.81 to 413.39)       | 0.02    | 516.26 (452.82 to 585.32)       | 15.72 (14.03 to 18.22)    | 0.03    | 22.26 (19.86 to 25.79)    |
|             | Hypertensive heart disease | 42.81 (37.56 to 49.71)          | 0.00    | 60.62 (53.19 to 70.38)          | 1.92 (1.68 to 2.20)       | 0.00    | 2.72 (2.38 to 3.11)       |
|             | All causes                 | 110.12 (98.54 to 122.75)        | 1.00    | 29329.62 (26246.57 to 32694.34) | 2.52 (2.36 to 2.68)       | 1.00    | 670.44 (628.04 to 714.55) |
|             | Non-communicable diseases  | 80.13 (70.57 to 90.71)          | 0.73    | 21343.28 (18795.65 to 24160.44) | 1.97 (1.83 to 2.11)       | 0.78    | 523.67 (487.49 to 560.97) |
|             | Cardiovascular diseases    | 18.65 (17.26 to 20.16)          | 0.17    | 4967.30 (4596.38 to 5369.76)    | 0.80 (0.75 to 0.86)       | 0.32    | 213.23 (198.50 to 228.35) |
|             | Ischemic heart disease     | 6.74 (6.18 to 7.35)             | 0.06    | 1795.33 (1644.88 to 1958.52)    | 0.31 (0.28 to 0.33)       | 0.12    | 81.60 (75.17 to 88.74)    |
|             | Stroke                     | 4.73 (4.30 to 5.17)             | 0.04    | 1260.71 (1145.80 to 1377.35)    | 0.20 (0.19 to 0.22)       | 0.08    | 54.15 (49.28 to 59.53)    |
| The Gambia  | Ischemic stroke            | 1.61 (1.45 to 1.77)             | 0.01    | 428.50 (386.89 to 471.64)       | 0.08 (0.07 to 0.09)       | 0.03    | 21.40 (19.36 to 23.74)    |
|             | Hypertensive heart disease | 3.49 (2.77 to 3.97)             | 0.03    | 928.81 (738.72 to 1056.74)      | 0.16 (0.13 to 0.19)       | 0.06    | 43.08 (33.43 to 49.69)    |
|             | All causes                 | 835.57 (737.49 to 957.86)       | 1.00    | 39182.44 (34583.10 to 44917.23) | 13.65 (12.31 to 15.33)    | 1.00    | 640.20 (577.47 to 718.83) |
|             | Non-communicable diseases  | 346.95 (291.89 to 414.96)       | 0.42    | 16269.66 (13687.74 to 19458.73) | 6.64 (5.79 to 7.73)       | 0.49    | 311.44 (271.32 to 362.52) |
|             | Cardiovascular diseases    | 65.95 (57.56 to 75.52)          | 0.08    | 3092.75 (2699.35 to 3541.15)    | 2.69 (2.37 to 3.05)       | 0.20    | 125.94 (110.99 to 143.06) |
|             | Ischemic heart disease     | 29.85 (25.18 to 34.57)          | 0.04    | 1399.74 (1180.88 to 1620.89)    | 1.35 (1.17 to 1.54)       | 0.10    | 63.52 (54.98 to 72.16)    |
|             | Stroke                     | 23.07 (19.52 to 27.15)          | 0.03    | 1082.06 (915.38 to 1273.08)     | 0.93 (0.79 to 1.09)       | 0.07    | 43.68 (37.16 to 51.04)    |
|             | Ischemic stroke            | 7.29 (5.93 to 8.73)             | 0.01    | 341.68 (278.11 to 409.56)       | 0.34 (0.27 to 0.41)       | 0.02    | 15.95 (12.84 to 19.11)    |
| Timor-Leste | Hypertensive heart disease | 2.50 (1.54 to 3.51)             | 0.00    | 117.01 (72.05 to 164.40)        | 0.10 (0.06 to 0.14)       | 0.01    | 4.83 (2.94 to 6.68)       |
|             | All causes                 | 388.24 (345.34 to 437.01)       | 1.00    | 30155.03 (26822.87 to 33943.21) | 7.19 (6.56 to 7.85)       | 1.00    | 558.67 (509.38 to 609.43) |
|             | Non-communicable diseases  | 217.81 (182.79 to 250.60)       | 0.56    | 16917.75 (14197.07 to 19464.02) | 4.87 (4.20 to 5.43)       | 0.68    | 378.26 (326.59 to 421.76) |
|             | Cardiovascular diseases    | 53.48 (43.62 to 61.36)          | 0.14    | 4153.66 (3388.27 to 4765.77)    | 2.28 (1.96 to 2.59)       | 0.32    | 177.41 (152.30 to 201.09) |
|             | Ischemic heart disease     | 20.83 (15.37 to 25.55)          | 0.05    | 1618.25 (1193.55 to 1984.82)    | 0.94 (0.73 to 1.13)       | 0.13    | 72.63 (56.32 to 87.45)    |
|             | Stroke                     | 24.81 (20.34 to 28.71)          | 0.06    | 1927.02 (1579.80 to 2230.13)    | 1.10 (0.92 to 1.26)       | 0.15    | 85.28 (71.37 to 97.80)    |
|             | Ischemic stroke            | 8.28 (6.59 to 9.71)             | 0.02    | 643.18 (511.75 to 754.10)       | 0.42 (0.32 to 0.49)       | 0.06    | 32.32 (25.22 to 37.99)    |
|             | Hypertensive heart disease | 2.11 (1.53 to 2.61)             | 0.01    | 164.04 (118.56 to 202.58)       | 0.10 (0.07 to 0.12)       | 0.01    | 7.50 (5.36 to 9.19)       |
| Togo        | All causes                 | 3264.43 (2870.40 to 3707.66)    | 1.00    | 43432.93 (38190.33 to 49330.09) | 50.47 (45.05 to 56.81)    | 1.00    | 671.48 (599.36 to 755.80) |
|             | Non-communicable diseases  | 1128.19 (955.47 to 1305.84)     | 0.35    | 15010.49 (12712.49 to 17374.03) | 19.02 (16.32 to 22.13)    | 0.38    | 253.11 (217.19 to 294.39) |
|             | Cardiovascular diseases    | 209.08 (179.47 to 243.47)       | 0.06    | 2781.81 (2387.88 to 3239.36)    | 7.58 (6.54 to 8.87)       | 0.15    | 100.86 (86.99 to 118.07)  |
|             | Ischemic heart disease     | 86.72 (72.03 to 103.39)         | 0.03    | 1153.85 (958.31 to 1375.56)     | 3.55 (3.00 to 4.17)       | 0.07    | 47.22 (39.97 to 55.51)    |

**Table 3S National and regional disability-adjusted life years (DALYs) and deaths of non-communicable and cardiovascular diseases for 195 countries according to the GBD 2017 study.**

| Countries           | Cause                      | DALYs                           |         |                                 | Deaths                    |         |                           |
|---------------------|----------------------------|---------------------------------|---------|---------------------------------|---------------------------|---------|---------------------------|
|                     |                            | Number (thousand)               | Percent | Rate                            | Number (thousand)         | Percent | Rate                      |
|                     |                            | Mean (95% UI)                   | Mean    | Mean (95% UI)                   | Mean (95% UI)             | Mean    | Mean (95% UI)             |
| Tonga               | Stroke                     | 77.60 (65.29 to 93.10)          | 0.02    | 1032.43 (868.66 to 1238.72)     | 2.80 (2.36 to 3.35)       | 0.06    | 37.20 (31.42 to 44.57)    |
|                     | Ischemic stroke            | 25.21 (20.72 to 30.37)          | 0.01    | 335.43 (275.63 to 404.13)       | 1.03 (0.83 to 1.25)       | 0.02    | 13.72 (11.07 to 16.66)    |
|                     | Hypertensive heart disease | 8.44 (4.77 to 12.54)            | 0.00    | 112.23 (63.44 to 166.90)        | 0.31 (0.17 to 0.47)       | 0.01    | 4.16 (2.31 to 6.19)       |
|                     | All causes                 | 29.27 (25.95 to 32.96)          | 1.00    | 28461.62 (25232.14 to 32048.92) | 0.70 (0.63 to 0.78)       | 1.00    | 681.45 (612.29 to 757.16) |
|                     | Non-communicable diseases  | 21.46 (18.87 to 24.32)          | 0.73    | 20865.55 (18351.77 to 23646.07) | 0.57 (0.51 to 0.63)       | 0.81    | 552.04 (497.21 to 615.89) |
|                     | Cardiovascular diseases    | 3.94 (3.55 to 4.38)             | 0.13    | 3833.87 (3452.40 to 4263.43)    | 0.17 (0.15 to 0.19)       | 0.24    | 163.57 (146.70 to 182.87) |
|                     | Ischemic heart disease     | 1.99 (1.77 to 2.29)             | 0.07    | 1938.74 (1717.05 to 2226.99)    | 0.09 (0.08 to 0.10)       | 0.13    | 88.80 (79.58 to 99.96)    |
|                     | Stroke                     | 1.20 (1.07 to 1.35)             | 0.04    | 1170.72 (1045.21 to 1308.18)    | 0.05 (0.05 to 0.06)       | 0.08    | 51.61 (45.14 to 58.56)    |
| Trinidad and Tobago | Ischemic stroke            | 0.42 (0.37 to 0.47)             | 0.01    | 408.82 (357.98 to 461.23)       | 0.02 (0.02 to 0.02)       | 0.03    | 19.08 (16.30 to 21.90)    |
|                     | Hypertensive heart disease | 0.13 (0.11 to 0.15)             | 0.00    | 124.58 (105.12 to 148.93)       | 0.01 (0.00 to 0.01)       | 0.01    | 5.47 (4.55 to 6.59)       |
|                     | All causes                 | 446.70 (386.98 to 512.89)       | 1.00    | 32094.99 (27804.40 to 36850.83) | 11.41 (9.80 to 13.26)     | 1.00    | 819.70 (703.79 to 952.62) |
|                     | Non-communicable diseases  | 345.48 (297.11 to 399.06)       | 0.77    | 24822.19 (21346.86 to 28672.09) | 9.63 (8.23 to 11.25)      | 0.84    | 691.91 (591.05 to 808.38) |
|                     | Cardiovascular diseases    | 83.03 (70.51 to 97.25)          | 0.19    | 5965.51 (5066.27 to 6987.54)    | 3.92 (3.35 to 4.57)       | 0.34    | 281.52 (240.58 to 328.67) |
|                     | Ischemic heart disease     | 42.81 (35.76 to 50.64)          | 0.10    | 3076.10 (2569.34 to 3638.13)    | 2.12 (1.79 to 2.48)       | 0.19    | 152.08 (128.60 to 178.10) |
|                     | Stroke                     | 22.58 (19.04 to 26.57)          | 0.05    | 1622.39 (1367.65 to 1908.99)    | 1.10 (0.93 to 1.29)       | 0.10    | 78.95 (66.93 to 92.55)    |
|                     | Ischemic stroke            | 8.75 (7.57 to 10.19)            | 0.02    | 628.66 (543.88 to 732.27)       | 0.46 (0.39 to 0.54)       | 0.04    | 33.24 (28.25 to 38.85)    |
| Tunisia             | Hypertensive heart disease | 5.77 (4.57 to 9.21)             | 0.01    | 414.40 (328.24 to 661.77)       | 0.28 (0.22 to 0.47)       | 0.02    | 20.22 (15.88 to 33.55)    |
|                     | All causes                 | 2737.52 (2327.86 to 3181.91)    | 1.00    | 23924.84 (20344.50 to 27808.57) | 66.26 (56.00 to 77.77)    | 1.00    | 579.12 (489.41 to 679.71) |
|                     | Non-communicable diseases  | 2197.53 (1850.29 to 2571.19)    | 0.80    | 19205.55 (16170.80 to 22471.14) | 57.12 (48.25 to 67.12)    | 0.86    | 499.17 (421.71 to 586.56) |
|                     | Cardiovascular diseases    | 596.99 (502.98 to 706.21)       | 0.22    | 5217.48 (4395.87 to 6172.00)    | 34.12 (28.81 to 40.00)    | 0.51    | 298.21 (251.80 to 349.58) |
|                     | Ischemic heart disease     | 365.92 (301.80 to 437.91)       | 0.13    | 3197.97 (2637.63 to 3827.17)    | 22.03 (18.36 to 25.95)    | 0.33    | 192.49 (160.44 to 226.79) |
|                     | Stroke                     | 146.46 (124.66 to 172.95)       | 0.05    | 1279.98 (1089.45 to 1511.54)    | 7.97 (6.67 to 9.51)       | 0.12    | 69.65 (58.31 to 83.13)    |
|                     | Ischemic stroke            | 98.04 (83.04 to 116.91)         | 0.04    | 856.79 (725.71 to 1021.75)      | 5.81 (4.81 to 7.02)       | 0.09    | 50.79 (42.05 to 61.37)    |
|                     | Hypertensive heart disease | 38.64 (17.60 to 52.77)          | 0.01    | 337.72 (153.78 to 461.22)       | 2.35 (0.94 to 3.29)       | 0.04    | 20.56 (8.18 to 28.76)     |
| Turkey              | All causes                 | 18906.02 (16493.27 to 21596.36) | 1.00    | 23498.33 (20499.52 to 26842.16) | 402.29 (374.82 to 430.23) | 1.00    | 500.01 (465.87 to 534.74) |
|                     | Non-communicable diseases  | 15587.08 (13432.33 to 18003.55) | 0.82    | 19373.21 (16695.08 to 22376.65) | 353.27 (328.05 to 378.33) | 0.88    | 439.08 (407.73 to 470.23) |
|                     | Cardiovascular diseases    | 2955.83 (2711.54 to 3190.86)    | 0.16    | 3673.81 (3370.18 to 3965.93)    | 146.58 (135.82 to 157.39) | 0.36    | 182.19 (168.82 to 195.62) |
|                     | Ischemic heart disease     | 1577.22 (1435.99 to 1716.91)    | 0.08    | 1960.34 (1784.79 to 2133.95)    | 84.45 (77.43 to 91.62)    | 0.21    | 104.96 (96.24 to 113.88)  |
|                     | Stroke                     | 819.52 (750.41 to 888.95)       | 0.04    | 1018.59 (932.68 to 1104.88)     | 38.01 (34.97 to 41.12)    | 0.09    | 47.25 (43.47 to 51.10)    |
|                     | Ischemic stroke            | 349.68 (312.49 to 391.61)       | 0.02    | 434.62 (388.40 to 486.73)       | 16.79 (15.19 to 18.32)    | 0.04    | 20.86 (18.88 to 22.77)    |
|                     | Hypertensive heart disease | 178.71 (146.54 to 200.43)       | 0.01    | 222.12 (182.13 to 249.11)       | 11.36 (7.56 to 12.96)     | 0.03    | 14.11 (9.40 to 16.11)     |
|                     | All causes                 | 1556.89 (1394.09 to 1722.22)    | 1.00    | 31282.38 (28011.30 to 34604.35) | 32.99 (31.17 to 35.13)    | 1.00    | 662.90 (626.24 to 705.81) |
| Turkmenistan        | Non-communicable diseases  | 1133.70 (1016.62 to 1259.96)    | 0.73    | 22779.32 (20426.82 to 25316.22) | 27.95 (26.35 to 29.65)    | 0.85    | 561.65 (529.46 to 595.70) |
|                     | Cardiovascular diseases    | 422.55 (395.79 to 449.83)       | 0.27    | 8490.19 (7952.65 to 9038.33)    | 17.56 (16.55 to 18.58)    | 0.53    | 352.77 (332.55 to 373.42) |
|                     | Ischemic heart disease     | 226.83 (211.90 to 242.50)       | 0.15    | 4557.70 (4257.59 to 4872.54)    | 10.64 (9.99 to 11.32)     | 0.32    | 213.80 (200.78 to 227.51) |
|                     | Stroke                     | 134.73 (125.43 to 144.06)       | 0.09    | 2707.16 (2520.31 to 2894.52)    | 5.12 (4.77 to 5.46)       | 0.16    | 102.82 (95.85 to 109.69)  |

**Table 3S National and regional disability-adjusted life years (DALYs) and deaths of non-communicable and cardiovascular diseases for 195 countries according to the GBD 2017 study.**

| Countries            | Cause                      | DALYs                             |         |                                 | Deaths                       |         |                              |
|----------------------|----------------------------|-----------------------------------|---------|---------------------------------|------------------------------|---------|------------------------------|
|                      |                            | Number (thousand)                 | Percent | Rate                            | Number (thousand)            | Percent | Rate                         |
|                      |                            | Mean (95% UI)                     | Mean    | Mean (95% UI)                   | Mean (95% UI)                | Mean    | Mean (95% UI)                |
| Uganda               | Ischemic stroke            | 11.45 (9.83 to 12.96)             | 0.01    | 230.13 (197.55 to 260.42)       | 0.48 (0.43 to 0.53)          | 0.01    | 9.61 (8.60 to 10.68)         |
|                      | Hypertensive heart disease | 15.01 (10.47 to 18.40)            | 0.01    | 301.54 (210.31 to 369.70)       | 0.59 (0.46 to 0.75)          | 0.02    | 11.81 (9.20 to 15.13)        |
|                      | All causes                 | 16628.90 (14934.71 to 18551.78)   | 1.00    | 42552.68 (38217.33 to 47473.27) | 232.63 (213.45 to 256.09)    | 1.00    | 595.29 (546.21 to 655.33)    |
|                      | Non-communicable diseases  | 5077.10 (4364.49 to 5825.55)      | 0.31    | 12992.09 (11168.55 to 14907.35) | 79.16 (70.56 to 88.00)       | 0.34    | 202.58 (180.56 to 225.18)    |
|                      | Cardiovascular diseases    | 604.53 (535.20 to 679.20)         | 0.04    | 1546.98 (1369.54 to 1738.06)    | 22.89 (20.26 to 25.61)       | 0.10    | 58.57 (51.85 to 65.54)       |
|                      | Ischemic heart disease     | 208.67 (167.83 to 253.41)         | 0.01    | 533.98 (429.48 to 648.47)       | 9.04 (7.28 to 10.89)         | 0.04    | 23.13 (18.63 to 27.88)       |
|                      | Stroke                     | 206.96 (174.63 to 241.17)         | 0.01    | 529.60 (446.87 to 617.16)       | 8.33 (6.94 to 9.77)          | 0.04    | 21.33 (17.75 to 25.00)       |
| Ukraine              | Ischemic stroke            | 58.45 (45.52 to 76.10)            | 0.00    | 149.56 (116.47 to 194.73)       | 2.70 (2.01 to 3.64)          | 0.01    | 6.91 (5.14 to 9.32)          |
|                      | Hypertensive heart disease | 55.52 (28.18 to 79.23)            | 0.00    | 142.06 (72.12 to 202.75)        | 2.62 (1.31 to 3.88)          | 0.01    | 6.70 (3.34 to 9.92)          |
|                      | All causes                 | 21194.68 (19440.88 to 23095.20)   | 1.00    | 47426.96 (43502.52 to 51679.74) | 689.88 (664.02 to 718.85)    | 1.00    | 1543.73 (1485.86 to 1608.55) |
|                      | Non-communicable diseases  | 17308.19 (15861.54 to 18813.12)   | 0.82    | 38730.24 (35493.09 to 42097.80) | 625.97 (602.29 to 651.79)    | 0.91    | 1400.73 (1347.74 to 1458.51) |
|                      | Cardiovascular diseases    | 7563.39 (7232.45 to 7901.04)      | 0.36    | 16924.46 (16183.92 to 17680.03) | 427.32 (411.21 to 445.32)    | 0.62    | 956.21 (920.16 to 996.49)    |
|                      | Ischemic heart disease     | 4971.27 (4751.77 to 5195.69)      | 0.23    | 11124.14 (10632.96 to 11626.32) | 309.60 (297.61 to 322.55)    | 0.45    | 692.80 (665.96 to 721.76)    |
|                      | Stroke                     | 1751.07 (1642.42 to 1859.05)      | 0.08    | 3918.35 (3675.21 to 4159.96)    | 87.40 (83.30 to 92.02)       | 0.13    | 195.58 (186.39 to 205.92)    |
| United Arab Emirates | Ischemic stroke            | 1142.04 (1056.96 to 1218.97)      | 0.05    | 2555.52 (2365.13 to 2727.67)    | 61.89 (58.86 to 65.22)       | 0.09    | 138.49 (131.70 to 145.95)    |
|                      | Hypertensive heart disease | 22.83 (20.00 to 36.43)            | 0.00    | 51.10 (44.75 to 81.53)          | 1.27 (1.08 to 1.75)          | 0.00    | 2.84 (2.43 to 3.91)          |
|                      | All causes                 | 2235.43 (1872.31 to 2616.72)      | 1.00    | 22964.95 (19234.59 to 26882.02) | 26.37 (21.54 to 31.75)       | 1.00    | 270.95 (221.32 to 326.13)    |
|                      | Non-communicable diseases  | 1713.30 (1416.88 to 2032.67)      | 0.77    | 17600.98 (14555.83 to 20881.97) | 18.58 (15.11 to 22.60)       | 0.70    | 190.84 (155.27 to 232.19)    |
|                      | Cardiovascular diseases    | 267.70 (215.57 to 326.47)         | 0.12    | 2750.08 (2214.54 to 3353.93)    | 7.35 (5.87 to 9.04)          | 0.28    | 75.48 (60.25 to 92.91)       |
|                      | Ischemic heart disease     | 142.20 (110.43 to 180.28)         | 0.06    | 1460.86 (1134.48 to 1852.02)    | 4.25 (3.31 to 5.36)          | 0.16    | 43.70 (33.97 to 55.10)       |
|                      | Stroke                     | 77.54 (62.49 to 93.93)            | 0.03    | 796.59 (641.97 to 965.01)       | 1.95 (1.55 to 2.42)          | 0.07    | 20.03 (15.93 to 24.86)       |
| United Kingdom       | Ischemic stroke            | 39.90 (31.86 to 49.26)            | 0.02    | 409.89 (327.25 to 506.10)       | 1.04 (0.80 to 1.31)          | 0.04    | 10.69 (8.23 to 13.43)        |
|                      | Hypertensive heart disease | 19.34 (8.17 to 27.32)             | 0.01    | 198.68 (83.93 to 280.69)        | 0.57 (0.23 to 0.82)          | 0.02    | 5.86 (2.35 to 8.40)          |
|                      | All causes                 | 18434.41 (16175.11 to 21066.45)   | 1.00    | 27664.54 (24274.01 to 31614.45) | 608.26 (603.29 to 613.32)    | 1.00    | 912.82 (905.35 to 920.40)    |
|                      | Non-communicable diseases  | 16057.59 (14051.21 to 18301.02)   | 0.87    | 24097.65 (21086.67 to 27464.37) | 545.31 (540.67 to 549.88)    | 0.90    | 818.34 (811.38 to 825.21)    |
|                      | Cardiovascular diseases    | 2669.28 (2552.23 to 2797.26)      | 0.15    | 4005.79 (3830.13 to 4197.86)    | 176.52 (174.53 to 178.53)    | 0.29    | 264.90 (261.91 to 267.91)    |
|                      | Ischemic heart disease     | 1242.17 (1213.54 to 1276.24)      | 0.07    | 1864.13 (1821.16 to 1915.25)    | 87.02 (85.60 to 88.72)       | 0.14    | 130.59 (128.45 to 133.14)    |
|                      | Stroke                     | 686.48 (642.74 to 728.78)         | 0.04    | 1030.20 (964.56 to 1093.68)     | 47.02 (46.03 to 48.05)       | 0.08    | 70.57 (69.08 to 72.10)       |
| United States        | Ischemic stroke            | 355.33 (320.71 to 389.13)         | 0.02    | 533.24 (481.29 to 583.97)       | 24.89 (24.33 to 25.55)       | 0.04    | 37.36 (36.51 to 38.34)       |
|                      | Hypertensive heart disease | 62.81 (49.76 to 71.71)            | 0.00    | 94.26 (74.67 to 107.61)         | 4.01 (3.07 to 4.87)          | 0.01    | 6.02 (4.61 to 7.30)          |
|                      | All causes                 | 100563.72 (89138.99 to 113306.07) | 1.00    | 30958.02 (27440.97 to 34880.68) | 2857.69 (2806.19 to 2907.78) | 1.00    | 879.73 (863.87 to 895.14)    |
|                      | Non-communicable diseases  | 85221.37 (74993.96 to 96308.64)   | 0.85    | 26234.95 (23086.50 to 29648.11) | 2533.70 (2488.46 to 2578.48) | 0.89    | 779.99 (766.06 to 793.77)    |
|                      | Cardiovascular diseases    | 15639.79 (14983.80 to 16332.27)   | 0.16    | 4814.63 (4612.69 to 5027.80)    | 902.27 (885.05 to 918.75)    | 0.32    | 277.76 (272.46 to 282.83)    |
|                      | Ischemic heart disease     | 8025.82 (7787.05 to 8271.68)      | 0.08    | 2470.71 (2397.20 to 2546.39)    | 533.17 (518.96 to 548.04)    | 0.19    | 164.13 (159.76 to 168.71)    |
|                      | Stroke                     | 3584.47 (3250.74 to 3922.02)      | 0.04    | 1103.46 (1000.72 to 1207.37)    | 172.32 (166.41 to 178.29)    | 0.06    | 53.05 (51.23 to 54.89)       |

**Table 3S National and regional disability-adjusted life years (DALYs) and deaths of non-communicable and cardiovascular diseases for 195 countries according to the GBD 2017 study.**

| Countries  | Cause                      | DALYs                           |         |                                 | Deaths                    |         |                            |
|------------|----------------------------|---------------------------------|---------|---------------------------------|---------------------------|---------|----------------------------|
|            |                            | Number (thousand)               | Percent | Rate                            | Number (thousand)         | Percent | Rate                       |
|            |                            | Mean (95% UI)                   | Mean    | Mean (95% UI)                   | Mean (95% UI)             | Mean    | Mean (95% UI)              |
| Uruguay    | Ischemic stroke            | 1815.87 (1541.58 to 2076.69)    | 0.02    | 559.00 (474.57 to 639.30)       | 79.10 (76.10 to 82.67)    | 0.03    | 24.35 (23.43 to 25.45)     |
|            | Hypertensive heart disease | 848.05 (521.71 to 920.14)       | 0.01    | 261.07 (160.61 to 283.26)       | 43.46 (27.18 to 46.70)    | 0.02    | 13.38 (8.37 to 14.38)      |
|            | All causes                 | 1018.20 (901.79 to 1145.21)     | 1.00    | 29758.62 (26356.44 to 33470.59) | 33.51 (30.71 to 36.40)    | 1.00    | 979.49 (897.43 to 1063.77) |
|            | Non-communicable diseases  | 811.22 (712.13 to 915.87)       | 0.80    | 23709.16 (20813.11 to 26767.80) | 28.73 (26.31 to 31.22)    | 0.86    | 839.56 (768.87 to 912.53)  |
|            | Cardiovascular diseases    | 158.44 (145.23 to 173.03)       | 0.16    | 4630.65 (4244.52 to 5057.21)    | 9.91 (9.11 to 10.76)      | 0.30    | 289.69 (266.21 to 314.50)  |
|            | Ischemic heart disease     | 62.05 (56.36 to 68.28)          | 0.06    | 1813.50 (1647.27 to 1995.46)    | 4.17 (3.81 to 4.55)       | 0.12    | 121.85 (111.40 to 133.11)  |
|            | Stroke                     | 54.68 (49.84 to 60.03)          | 0.05    | 1598.26 (1456.60 to 1754.49)    | 3.34 (3.03 to 3.66)       | 0.10    | 97.49 (88.62 to 107.10)    |
| Uzbekistan | Ischemic stroke            | 27.05 (24.38 to 29.75)          | 0.03    | 790.48 (712.46 to 869.48)       | 1.78 (1.61 to 1.98)       | 0.05    | 51.92 (47.07 to 57.89)     |
|            | Hypertensive heart disease | 7.03 (5.43 to 8.26)             | 0.01    | 205.50 (158.69 to 241.31)       | 0.51 (0.35 to 0.60)       | 0.02    | 14.82 (10.22 to 17.51)     |
|            | All causes                 | 9431.11 (8353.67 to 10546.97)   | 1.00    | 29255.64 (25913.37 to 32717.08) | 205.26 (188.07 to 224.11) | 1.00    | 636.74 (583.41 to 695.20)  |
|            | Non-communicable diseases  | 6573.79 (5794.62 to 7420.00)    | 0.70    | 20392.12 (17975.12 to 23017.12) | 171.96 (156.72 to 188.49) | 0.84    | 533.41 (486.16 to 584.69)  |
|            | Cardiovascular diseases    | 2489.35 (2262.11 to 2730.41)    | 0.26    | 7722.04 (7017.14 to 8469.82)    | 115.26 (105.06 to 125.71) | 0.56    | 357.55 (325.91 to 389.97)  |
|            | Ischemic heart disease     | 1659.06 (1499.58 to 1826.57)    | 0.18    | 5146.47 (4651.74 to 5666.08)    | 82.81 (75.50 to 90.28)    | 0.40    | 256.89 (234.20 to 280.05)  |
|            | Stroke                     | 602.38 (543.20 to 660.72)       | 0.06    | 1868.61 (1685.04 to 2049.58)    | 25.14 (22.68 to 27.55)    | 0.12    | 77.98 (70.35 to 85.46)     |
| Vanuatu    | Ischemic stroke            | 190.46 (169.48 to 210.08)       | 0.02    | 590.81 (525.72 to 651.69)       | 7.98 (7.12 to 8.84)       | 0.04    | 24.74 (22.09 to 27.43)     |
|            | Hypertensive heart disease | 65.24 (50.55 to 80.44)          | 0.01    | 202.39 (156.82 to 249.52)       | 3.12 (2.29 to 3.81)       | 0.02    | 9.66 (7.12 to 11.83)       |
|            | All causes                 | 111.55 (92.30 to 135.75)        | 1.00    | 38792.10 (32097.43 to 47207.66) | 2.24 (1.82 to 2.75)       | 1.00    | 777.61 (634.28 to 956.78)  |
|            | Non-communicable diseases  | 71.12 (59.49 to 84.90)          | 0.64    | 24733.06 (20687.65 to 29523.54) | 1.66 (1.36 to 2.02)       | 0.74    | 577.92 (473.95 to 701.12)  |
|            | Cardiovascular diseases    | 22.76 (17.65 to 28.53)          | 0.20    | 7915.76 (6137.95 to 9921.82)    | 0.80 (0.64 to 0.97)       | 0.36    | 277.15 (221.33 to 338.55)  |
|            | Ischemic heart disease     | 10.56 (7.82 to 13.70)           | 0.09    | 3671.53 (2717.82 to 4764.98)    | 0.40 (0.31 to 0.51)       | 0.18    | 140.80 (106.59 to 177.06)  |
|            | Stroke                     | 7.40 (5.62 to 9.57)             | 0.07    | 2573.81 (1955.29 to 3326.36)    | 0.26 (0.20 to 0.32)       | 0.11    | 88.84 (69.31 to 112.92)    |
| Venezuela  | Ischemic stroke            | 1.75 (1.38 to 2.16)             | 0.02    | 607.87 (480.80 to 752.35)       | 0.07 (0.05 to 0.09)       | 0.03    | 24.18 (18.95 to 29.96)     |
|            | Hypertensive heart disease | 1.01 (0.67 to 1.42)             | 0.01    | 351.51 (232.91 to 492.99)       | 0.04 (0.03 to 0.05)       | 0.02    | 12.96 (8.75 to 17.67)      |
|            | All causes                 | 8200.70 (7251.77 to 9318.87)    | 1.00    | 26598.25 (23520.48 to 30224.91) | 172.58 (153.71 to 195.60) | 1.00    | 559.76 (498.54 to 634.40)  |
|            | Non-communicable diseases  | 5175.50 (4480.20 to 5993.31)    | 0.63    | 16786.29 (14531.14 to 19438.75) | 125.71 (111.98 to 141.90) | 0.73    | 407.71 (363.19 to 460.25)  |
|            | Cardiovascular diseases    | 1085.66 (959.29 to 1236.69)     | 0.13    | 3521.26 (3111.36 to 4011.08)    | 52.71 (46.77 to 59.50)    | 0.31    | 170.95 (151.68 to 192.98)  |
|            | Ischemic heart disease     | 627.53 (545.96 to 722.87)       | 0.08    | 2035.34 (1770.77 to 2344.55)    | 31.38 (27.34 to 35.83)    | 0.18    | 101.77 (88.67 to 116.20)   |
|            | Stroke                     | 273.64 (240.07 to 313.37)       | 0.03    | 887.54 (778.65 to 1016.40)      | 12.95 (11.31 to 14.80)    | 0.08    | 42.01 (36.68 to 48.01)     |
| Vietnam    | Ischemic stroke            | 70.38 (61.50 to 79.86)          | 0.01    | 228.27 (199.48 to 259.01)       | 4.12 (3.60 to 4.71)       | 0.02    | 13.35 (11.68 to 15.26)     |
|            | Hypertensive heart disease | 82.67 (69.08 to 111.10)         | 0.01    | 268.15 (224.05 to 360.35)       | 4.60 (3.83 to 6.48)       | 0.03    | 14.93 (12.41 to 21.01)     |
|            | All causes                 | 24813.15 (22031.24 to 27851.69) | 1.00    | 25809.19 (22915.62 to 28969.71) | 606.30 (557.72 to 666.41) | 1.00    | 630.64 (580.11 to 693.16)  |
|            | Non-communicable diseases  | 18441.62 (16179.87 to 20967.33) | 0.74    | 19181.90 (16829.37 to 21809.00) | 478.94 (439.35 to 529.75) | 0.79    | 498.17 (456.99 to 551.02)  |
|            | Cardiovascular diseases    | 4223.55 (3829.53 to 4715.08)    | 0.17    | 4393.09 (3983.26 to 4904.36)    | 201.14 (185.60 to 222.30) | 0.33    | 209.21 (193.05 to 231.22)  |
|            | Ischemic heart disease     | 1264.70 (1130.59 to 1434.04)    | 0.05    | 1315.47 (1175.97 to 1491.60)    | 65.27 (59.28 to 72.67)    | 0.11    | 67.89 (61.66 to 75.59)     |
|            | Stroke                     | 2357.69 (2116.83 to 2652.26)    | 0.10    | 2452.33 (2201.80 to 2758.73)    | 111.64 (101.86 to 124.27) | 0.18    | 116.12 (105.95 to 129.25)  |
|            | Ischemic stroke            | 816.51 (720.94 to 921.41)       | 0.03    | 849.28 (749.88 to 958.40)       | 44.85 (39.93 to 50.62)    | 0.07    | 46.65 (41.53 to 52.65)     |

**Table 3S National and regional disability-adjusted life years (DALYs) and deaths of non-communicable and cardiovascular diseases for 195 countries according to the GBD 2017 study.**

| Countries            | Cause                      | DALYs                           |         |                                 | Deaths                    |         |                              |
|----------------------|----------------------------|---------------------------------|---------|---------------------------------|---------------------------|---------|------------------------------|
|                      |                            | Number (thousand)               | Percent | Rate                            | Number (thousand)         | Percent | Rate                         |
|                      |                            | Mean (95% UI)                   | Mean    | Mean (95% UI)                   | Mean (95% UI)             | Mean    | Mean (95% UI)                |
| Virgin Islands, U.S. | Hypertensive heart disease | 188.38 (146.03 to 233.10)       | 0.01    | 195.95 (151.89 to 242.46)       | 9.35 (7.17 to 11.51)      | 0.02    | 9.73 (7.46 to 11.97)         |
|                      | All causes                 | 39.13 (34.46 to 43.87)          | 1.00    | 37279.79 (32831.41 to 41801.52) | 1.26 (1.10 to 1.37)       | 1.00    | 1197.58 (1044.68 to 1304.15) |
|                      | Non-communicable diseases  | 32.69 (28.47 to 36.71)          | 0.84    | 31142.96 (27124.52 to 34978.14) | 1.11 (0.96 to 1.21)       | 0.88    | 1056.85 (917.89 to 1151.89)  |
|                      | Cardiovascular diseases    | 9.20 (7.94 to 10.18)            | 0.24    | 8769.57 (7561.01 to 9702.53)    | 0.47 (0.41 to 0.52)       | 0.38    | 452.01 (392.50 to 496.77)    |
|                      | Ischemic heart disease     | 5.00 (4.21 to 5.60)             | 0.13    | 4764.65 (4013.22 to 5333.08)    | 0.27 (0.23 to 0.30)       | 0.22    | 258.39 (221.47 to 286.82)    |
|                      | Stroke                     | 1.79 (1.53 to 2.00)             | 0.05    | 1702.40 (1460.00 to 1902.61)    | 0.09 (0.08 to 0.10)       | 0.07    | 84.38 (71.92 to 93.82)       |
|                      | Ischemic stroke            | 0.66 (0.57 to 0.74)             | 0.02    | 626.86 (541.41 to 703.43)       | 0.03 (0.03 to 0.04)       | 0.03    | 33.15 (28.45 to 37.38)       |
| Yemen                | Hypertensive heart disease | 0.83 (0.68 to 1.02)             | 0.02    | 793.01 (651.95 to 970.35)       | 0.04 (0.03 to 0.05)       | 0.03    | 40.97 (33.05 to 49.86)       |
|                      | All causes                 | 11871.20 (10030.06 to 14172.37) | 1.00    | 38986.96 (32940.35 to 46544.39) | 164.70 (134.86 to 202.47) | 1.00    | 540.89 (442.91 to 664.93)    |
|                      | Non-communicable diseases  | 5178.49 (4264.58 to 6179.49)    | 0.44    | 17007.02 (14005.58 to 20294.45) | 89.57 (71.10 to 113.19)   | 0.54    | 294.16 (233.51 to 371.75)    |
|                      | Cardiovascular diseases    | 1406.62 (1110.94 to 1797.01)    | 0.12    | 4619.56 (3648.51 to 5901.67)    | 53.37 (42.44 to 66.77)    | 0.32    | 175.27 (139.38 to 219.28)    |
|                      | Ischemic heart disease     | 797.72 (626.38 to 1025.48)      | 0.07    | 2619.85 (2057.15 to 3367.84)    | 32.46 (25.81 to 40.56)    | 0.20    | 106.59 (84.76 to 133.20)     |
|                      | Stroke                     | 384.78 (304.21 to 487.20)       | 0.03    | 1263.67 (999.08 to 1600.05)     | 14.26 (11.21 to 18.03)    | 0.09    | 46.84 (36.80 to 59.23)       |
|                      | Ischemic stroke            | 199.01 (159.00 to 248.58)       | 0.02    | 653.60 (522.18 to 816.38)       | 8.52 (6.70 to 10.72)      | 0.05    | 27.99 (22.02 to 35.21)       |
| Zambia               | Hypertensive heart disease | 74.02 (32.09 to 104.29)         | 0.01    | 243.08 (105.39 to 342.51)       | 3.36 (1.36 to 4.63)       | 0.02    | 11.02 (4.48 to 15.19)        |
|                      | All causes                 | 7919.62 (6947.61 to 9048.46)    | 1.00    | 45609.19 (40011.40 to 52110.22) | 118.47 (106.84 to 131.10) | 1.00    | 682.27 (615.29 to 755.03)    |
|                      | Non-communicable diseases  | 2472.27 (2149.63 to 2811.09)    | 0.31    | 14237.85 (12379.77 to 16189.09) | 40.78 (36.77 to 45.13)    | 0.34    | 234.86 (211.78 to 259.93)    |
|                      | Cardiovascular diseases    | 329.74 (294.98 to 368.12)       | 0.04    | 1898.98 (1698.77 to 2120.00)    | 12.16 (10.78 to 13.57)    | 0.10    | 70.01 (62.09 to 78.13)       |
|                      | Ischemic heart disease     | 136.74 (120.82 to 154.65)       | 0.02    | 787.47 (695.80 to 890.62)       | 5.56 (4.91 to 6.22)       | 0.05    | 32.02 (28.28 to 35.85)       |
|                      | Stroke                     | 107.55 (94.69 to 122.34)        | 0.01    | 619.38 (545.33 to 704.58)       | 4.14 (3.61 to 4.70)       | 0.03    | 23.84 (20.79 to 27.08)       |
|                      | Ischemic stroke            | 30.88 (25.36 to 38.35)          | 0.00    | 177.81 (146.03 to 220.88)       | 1.33 (1.04 to 1.71)       | 0.01    | 7.69 (5.98 to 9.87)          |
| Zimbabwe             | Hypertensive heart disease | 24.47 (12.83 to 33.56)          | 0.00    | 140.90 (73.90 to 193.29)        | 1.10 (0.59 to 1.52)       | 0.01    | 6.33 (3.39 to 8.77)          |
|                      | All causes                 | 6980.18 (6269.80 to 7645.99)    | 1.00    | 47439.85 (42611.82 to 51964.89) | 117.63 (106.98 to 128.49) | 1.00    | 799.44 (727.10 to 873.28)    |
|                      | Non-communicable diseases  | 2332.98 (2050.70 to 2648.79)    | 0.33    | 15855.78 (13937.29 to 18002.15) | 44.90 (39.66 to 50.32)    | 0.38    | 305.16 (269.57 to 342.02)    |
|                      | Cardiovascular diseases    | 474.02 (416.70 to 535.85)       | 0.07    | 3221.58 (2832.07 to 3641.81)    | 16.98 (14.82 to 19.28)    | 0.14    | 115.38 (100.69 to 131.00)    |
|                      | Ischemic heart disease     | 201.63 (172.00 to 232.17)       | 0.03    | 1370.34 (1168.97 to 1577.94)    | 8.65 (7.40 to 9.94)       | 0.07    | 58.80 (50.32 to 67.55)       |
|                      | Stroke                     | 117.77 (101.68 to 136.39)       | 0.02    | 800.42 (691.08 to 926.95)       | 4.41 (3.75 to 5.11)       | 0.04    | 29.94 (25.49 to 34.72)       |
|                      | Ischemic stroke            | 36.68 (30.76 to 43.80)          | 0.01    | 249.26 (209.04 to 297.65)       | 1.61 (1.33 to 1.91)       | 0.01    | 10.93 (9.07 to 13.00)        |
|                      | Hypertensive heart disease | 18.48 (11.32 to 33.97)          | 0.00    | 125.59 (76.95 to 230.84)        | 0.73 (0.45 to 1.39)       | 0.01    | 4.93 (3.04 to 9.48)          |

**Table 4S Population, life expectancy and healthy life expectancy (HALE) for 195 countries and territories according to the GBD 2017 study.**

| GBD regions and countries                               | Population in 2020 (N) | Life expectancy (Years, 95% UI) | HALE (Years, 95% UI)          |
|---------------------------------------------------------|------------------------|---------------------------------|-------------------------------|
| <b>Central Europe, Eastern Europe, and Central Asia</b> |                        | <b>73.06 (72.9 to 73.2)</b>     | <b>63.06 (60.24 to 65.55)</b> |
| Albania                                                 | 2877800                | 78.23 (76.67 to 79.70)          | 67.49 (64.2 to 70.44)         |
| Armenia                                                 | 2963234                | 75.61 (75.33 to 75.90)          | 65.83 (62.91 to 68.25)        |
| Azerbaijan                                              | 10139175               | 70.76 (69.97 to 71.55)          | 62.05 (59.46 to 64.34)        |
| Belarus                                                 | 9449321                | 74.03 (73.47 to 74.53)          | 63.92 (60.96 to 66.52)        |
| Bosnia and Herzegovina                                  | 3280815                | 76.72 (76.21 to 77.21)          | 65.71 (62.66 to 68.5)         |
| Bulgaria                                                | 6948445                | 74.88 (74.36 to 75.43)          | 64.87 (61.97 to 67.39)        |
| Croatia                                                 | 4105268                | 78.53 (78.02 to 79.01)          | 67.42 (64.33 to 70.09)        |
| Czech Republic                                          | 10708982               | 79.17 (78.65 to 79.66)          | 67.4 (63.97 to 70.27)         |
| Estonia                                                 | 1326539                | 78.09 (76.94 to 79.32)          | 67.03 (63.79 to 70.05)        |
| Georgia                                                 | 3989175                | 72.83 (72.50 to 73.17)          | 63.8 (61.18 to 66.03)         |
| Hungary                                                 | 9660350                | 76.81 (76.31 to 77.30)          | 65.78 (62.75 to 68.47)        |
| Kazakhstan                                              | 18776707               | 71.98 (71.46 to 72.49)          | 62.71 (60.12 to 64.95)        |
| Kyrgyzstan                                              | 6524191                | 72.71 (72.42 to 73.00)          | 63.45 (60.83 to 65.72)        |
| Latvia                                                  | 1886202                | 75.17 (74.04 to 76.31)          | 64.58 (61.6 to 67.36)         |
| Lithuania                                               | 2722291                | 75.02 (74.39 to 75.64)          | 64.33 (61.33 to 67)           |
| Macedonia                                               | 2083380                | 76.55 (76.07 to 77.03)          | 66.01 (62.97 to 68.63)        |
| Moldova                                                 | 4033963                | 72.90 (72.56 to 73.23)          | 63 (60.22 to 65.43)           |
| Mongolia                                                | 3278292                | 68.94 (67.95 to 69.93)          | 60.25 (57.67 to 62.61)        |
| Montenegro                                              | 628062                 | 76.49 (75.76 to 77.18)          | 65.98 (62.92 to 68.6)         |
| Poland                                                  | 37846605               | 77.99 (77.49 to 78.46)          | 66.81 (63.68 to 69.64)        |
| Romania                                                 | 19237682               | 75.18 (74.70 to 75.67)          | 64.71 (61.63 to 67.36)        |
| Russian Federation                                      | 145934460              | 72.08 (71.98 to 72.17)          | 62.16 (59.36 to 64.62)        |
| Serbia                                                  | 6804596                | 75.71 (75.26 to 76.19)          | 65.28 (62.32 to 67.89)        |
| Slovakia                                                | 5459643                | 77.41 (76.90 to 77.91)          | 66.33 (63.22 to 69.04)        |
| Slovenia                                                | 2078932                | 81.10 (80.54 to 81.66)          | 68.74 (65.26 to 71.77)        |
| Tajikistan                                              | 9537642                | 70.32 (69.31 to 71.26)          | 61.32 (58.63 to 63.81)        |
| Turkmenistan                                            |                        | 70.10 (69.27 to 70.87)          | 61.67 (59.12 to 63.97)        |
| Ukraine                                                 | 43733759               | 70.55 (69.96 to 71.12)          | 60.99 (58.33 to 63.38)        |
| Uzbekistan                                              | 33469199               | 70.35 (69.23 to 71.51)          | 61.58 (58.86 to 64.2)         |
| <b>High-income</b>                                      |                        | <b>81.02 (80.88 to 81.16)</b>   | <b>69.59 (66.35 to 72.36)</b> |
| Andorra                                                 | 77265                  | 82.70 (81.77 to 83.58)          | 71.2 (67.94 to 74.12)         |
| Argentina                                               | 45195777               | 76.66 (75.54 to 77.68)          | 66.82 (63.8 to 69.55)         |
| Australia                                               | 25499881               | 82.39 (81.50 to 83.24)          | 70.37 (66.89 to 73.33)        |
| Austria                                                 | 9006400                | 81.77 (81.29 to 82.22)          | 70.44 (67.21 to 73.34)        |
| Belgium                                                 | 11589616               | 81.38 (80.88 to 81.85)          | 69.62 (66.22 to 72.54)        |
| Brunei                                                  | 437483                 | 75.35 (74.60 to 76.08)          | 66.17 (63.43 to 68.57)        |
| Canada                                                  | 37742157               | 81.96 (81.47 to 82.42)          | 70.51 (67.2 to 73.35)         |
| Chile                                                   | 19116209               | 79.70 (78.68 to 80.67)          | 68.69 (65.48 to 71.4)         |
| Cyprus                                                  | 875899                 | 81.72 (81.00 to 82.40)          | 70.68 (67.52 to 73.43)        |
| Denmark                                                 | 5792203                | 80.76 (80.25 to 81.27)          | 69.63 (66.38 to 72.44)        |
| Finland                                                 | 5540718                | 81.42 (80.90 to 81.90)          | 69.78 (66.44 to 72.69)        |
| France                                                  | 65273512               | 82.84 (82.37 to 83.29)          | 71.75 (68.58 to 74.46)        |
| Germany                                                 | 83783945               | 80.63 (79.72 to 81.53)          | 69.55 (66.28 to 72.46)        |
| Greece                                                  | 10423056               | 80.99 (80.52 to 81.47)          | 69.93 (66.88 to 72.64)        |
| Iceland                                                 | 341250                 | 82.75 (82.41 to 83.06)          | 71.26 (67.93 to 74.11)        |
| Ireland                                                 | 4937796                | 81.85 (81.35 to 82.35)          | 70.35 (67.07 to 73.09)        |
| Israel                                                  | 8655541                | 82.97 (82.50 to 83.45)          | 71.38 (68 to 74.36)           |
| Italy                                                   | 60461828               | 83.17 (82.73 to 83.62)          | 71.87 (68.71 to 74.68)        |
| Japan                                                   | 126476458              | 84.19 (83.98 to 84.38)          | 73.07 (69.88 to 75.86)        |
| Luxembourg                                              | 625976                 | 81.66 (80.95 to 82.39)          | 69.7 (66.26 to 72.64)         |
| Malta                                                   | 441539                 | 80.99 (80.62 to 81.37)          | 69.82 (66.49 to 72.6)         |
| Netherlands                                             | 17134873               | 81.52 (81.04 to 81.97)          | 70.16 (66.91 to 73.01)        |
| New Zealand                                             | 4822233                | 81.64 (81.17 to 82.05)          | 69.05 (65.37 to 72.2)         |
| Norway                                                  | 5421242                | 82.34 (82.19 to 82.49)          | 70.24 (66.81 to 73.16)        |



**Table 4S Population, life expectancy and healthy life expectancy (HALE) for 195 countries and territories according to the GBD 2017 study.**

| GBD regions and countries           | Population in 2020 (N) | Life expectancy (Years, 95% UI) | HALE (Years, 95% UI)          |
|-------------------------------------|------------------------|---------------------------------|-------------------------------|
| Portugal                            | 10196707               | 81.44 (80.99 to 81.90)          | 70.13 (66.87 to 73)           |
| Singapore                           | 5850343                | 84.79 (84.30 to 85.25)          | 74.22 (71.22 to 76.83)        |
| South Korea                         | 51269183               | 82.60 (82.11 to 83.10)          | 71.68 (68.51 to 74.31)        |
| Spain                               | 46754783               | 83.06 (82.68 to 83.46)          | 72.08 (68.86 to 74.84)        |
| Sweden                              | 10099270               | 82.50 (82.10 to 82.90)          | 70.93 (67.59 to 73.89)        |
| Switzerland                         | 8654618                | 83.96 (83.54 to 84.40)          | 71.98 (68.56 to 75)           |
| United Kingdom                      | 67886004               | 80.97 (80.87 to 81.06)          | 69.3 (66.01 to 72.12)         |
| United States                       | 331002647              | 78.59 (78.37 to 78.81)          | 66.57 (63.33 to 69.46)        |
| Uruguay                             | 3473727                | 77.05 (75.98 to 78.08)          | 67.2 (64.34 to 69.79)         |
| <b>Latin America and Caribbean</b>  |                        | <b>75.86 (75.56 to 76.15)</b>   | <b>66.21 (63.44 to 68.57)</b> |
| Antigua and Barbuda                 | 97928                  | 77.02 (76.47 to 77.61)          | 67.26 (64.34 to 69.76)        |
| Barbados                            | 287371                 | 77.13 (76.38 to 77.87)          | 67.89 (65.14 to 70.3)         |
| Belize                              | 397621                 | 74.16 (73.72 to 74.58)          | 64.92 (62.27 to 67.26)        |
| Bolivia                             | 11673029               | 72.75 (71.04 to 74.63)          | 63.59 (60.65 to 66.45)        |
| Brazil                              | 212559409              | 75.51 (75.25 to 75.73)          | 65.4 (62.5 to 67.83)          |
| Colombia                            | 50882884               | 80.11 (79.04 to 81.14)          | 70.4 (67.5 to 72.95)          |
| Costa Rica                          | 5094114                | 79.47 (78.89 to 80.04)          | 69.83 (67.04 to 72.23)        |
| Cuba                                | 11326616               | 78.42 (77.37 to 79.40)          | 69.15 (66.45 to 71.54)        |
| Dominica                            | 71991                  | 72.77 (72.02 to 73.57)          | 64.08 (61.58 to 66.37)        |
| Dominican Republic                  | 10847904               | 73.09 (71.71 to 74.61)          | 64.23 (61.43 to 66.68)        |
| Ecuador                             | 17643060               | 76.73 (75.74 to 77.65)          | 67.21 (64.4 to 69.61)         |
| El Salvador                         | 6486201                | 74.01 (72.22 to 75.81)          | 65 (62.12 to 67.66)           |
| Grenada                             | 112519                 | 74.11 (73.55 to 74.63)          | 65.24 (62.59 to 67.46)        |
| Guatemala                           | 17915567               | 72.63 (71.42 to 73.69)          | 63.67 (60.95 to 66.19)        |
| Guyana                              | 786559                 | 69.21 (67.90 to 70.49)          | 60.44 (57.63 to 62.8)         |
| Haiti                               | 11402533               | 64.95 (63.05 to 66.94)          | 56.26 (53.4 to 58.87)         |
| Honduras                            | 9904608                | 73.98 (72.10 to 75.89)          | 64.91 (61.84 to 67.62)        |
| Jamaica                             | 2961161                | 74.66 (73.22 to 76.08)          | 65.6 (62.67 to 68.02)         |
| Mexico                              | 128932753              | 75.52 (75.27 to 75.76)          | 66.23 (63.6 to 68.47)         |
| Nicaragua                           | 6624554                | 78.80 (77.73 to 79.78)          | 68.8 (66.01 to 71.44)         |
| Panama                              | 4314768                | 79.29 (78.72 to 79.87)          | 69.44 (66.67 to 71.93)        |
| Paraguay                            | 7132530                | 76.12 (74.36 to 77.67)          | 66.05 (62.87 to 68.88)        |
| Peru                                | 32971846               | 80.31 (78.92 to 81.63)          | 70.28 (67.31 to 73.28)        |
| Saint Lucia                         | 183629                 | 75.54 (74.90 to 76.13)          | 66.33 (63.69 to 68.64)        |
| Saint Vincent and the Grenadines    | 110947                 | 72.29 (71.66 to 72.88)          | 63.46 (60.9 to 65.77)         |
| Suriname                            | 586634                 | 72.04 (70.94 to 73.22)          | 63.15 (60.5 to 65.54)         |
| The Bahamas                         | 393248                 | 73.73 (72.87 to 74.63)          | 65.08 (62.46 to 67.58)        |
| Trinidad and Tobago                 | 1399491                | 74.24 (72.19 to 76.22)          | 64.99 (61.85 to 67.82)        |
| Venezuela                           | 28435943               | 75.29 (73.61 to 76.78)          | 66.21 (63.31 to 68.8)         |
| <b>North Africa and Middle East</b> |                        | <b>74.24 (73.87 to 74.59)</b>   | <b>63.36 (60.31 to 66.02)</b> |
| Algeria                             | 43851043               | 77.74 (77.30 to 78.19)          | 66.48 (63.26 to 69.32)        |
| Bahrain                             | 1701583                | 79.49 (78.81 to 80.16)          | 67.81 (64.48 to 70.79)        |
| Egypt                               | 102334403              | 70.64 (69.61 to 71.69)          | 60.81 (58.03 to 63.35)        |
| Iran                                | 83992953               | 77.35 (77.28 to 77.42)          | 65.74 (62.49 to 68.6)         |
| Iraq                                | 40222503               | 76.73 (76.06 to 77.34)          | 64.42 (61.07 to 67.49)        |
| Jordan                              | 10203140               | 79.33 (78.33 to 80.25)          | 67.73 (64.4 to 70.59)         |
| Kuwait                              | 4270563                | 83.12 (82.62 to 83.59)          | 70.75 (67.18 to 73.87)        |
| Lebanon                             | 6825442                | 77.97 (77.42 to 78.51)          | 66.26 (62.98 to 69.15)        |
| Libya                               | 6871287                | 72.96 (71.67 to 74.25)          | 62.13 (59.15 to 65.08)        |
| Morocco                             | 36910558               | 73.97 (72.35 to 75.60)          | 63.15 (59.94 to 66.11)        |
| Oman                                | 5106622                | 77.10 (75.60 to 78.63)          | 65.82 (62.77 to 68.91)        |
| Palestine                           | 5101416                | 76.85 (76.24 to 77.40)          | 65.14 (61.86 to 68.02)        |
| Qatar                               | 2881060                | 80.21 (78.73 to 81.64)          | 68.35 (64.98 to 71.59)        |
| Saudi Arabia                        | 34813867               | 76.86 (75.77 to 77.69)          | 66.32 (63.43 to 69.12)        |
| Syria                               | 17500657               | 69.79 (68.55 to 70.93)          | 59.79 (57.02 to 62.4)         |

**Table 4S Population, life expectancy and healthy life expectancy (HALE) for 195 countries and territories according to the GBD 2017 study.**

| GBD regions and countries                     | Population in 2020 (N) | Life expectancy (Years, 95% UI) | HALE (Years, 95% UI)          |
|-----------------------------------------------|------------------------|---------------------------------|-------------------------------|
| Tunisia                                       | 11818618               | 78.33 (76.51 to 80.07)          | 67.31 (64.06 to 70.31)        |
| Turkey                                        | 84339067               | 78.94 (78.13 to 79.74)          | 67.88 (64.76 to 70.73)        |
| United Arab Emirates                          | 9890400                | 73.32 (71.41 to 75.22)          | 63.1 (60.08 to 65.95)         |
| Yemen                                         | 29825968               | 68.06 (65.47 to 70.43)          | 56.73 (53.29 to 60.32)        |
| <b>South Asia</b>                             |                        | <b>72.54 (72.09 to 72.96)</b>   | <b>59.48 (56.9 to 61.8)</b>   |
| Afghanistan                                   | 38928341               | 63.38 (61.63 to 65.10)          | 53.04 (49.94 to 55.91)        |
| Bangladesh                                    | 164689383              | 73.12 (71.94 to 74.24)          | 63.06 (60.2 to 65.63)         |
| Bhutan                                        | 771612                 | 74.05 (72.45 to 75.80)          | 64.11 (61.09 to 66.86)        |
| India                                         | 1380004385             | 68.97 (68.40 to 69.45)          | 59.37 (56.71 to 61.74)        |
| Nepal                                         | 29136808               | 70.92 (69.77 to 72.12)          | 61.1 (58.38 to 63.55)         |
| Pakistan                                      | 220892331              | 66.85 (64.93 to 68.67)          | 58 (55.18 to 60.65)           |
| <b>Southeast Asia, East Asia, and Oceania</b> |                        | <b>75.61 (75.33 to 75.88)</b>   | <b>66.64 (64.11 to 68.81)</b> |
| Cambodia                                      | 16718971               | 69.88 (68.62 to 71.05)          | 60.74 (58.02 to 63.23)        |
| China                                         | 1439323774             | 77.07 (76.73 to 77.42)          | 68.09 (65.62 to 70.28)        |
| Federated States of Micronesia                |                        | 67.21 (65.58 to 68.79)          | 58.23 (55.21 to 60.72)        |
| Fiji                                          | 896444                 | 68.07 (66.68 to 69.48)          | 59.14 (56.41 to 61.65)        |
| Indonesia                                     | 273523621              | 71.48 (70.84 to 72.09)          | 62.65 (60.04 to 64.93)        |
| Kiribati                                      |                        | 62.41 (60.64 to 64.12)          | 53.97 (51.26 to 56.54)        |
| Laos                                          | 7275556                | 67.58 (66.03 to 69.11)          | 59.48 (56.9 to 61.99)         |
| Malaysia                                      | 32365998               | 74.72 (73.91 to 75.49)          | 65.97 (63.56 to 68.25)        |
| Maldives                                      | 540542                 | 81.45 (80.91 to 81.99)          | 71.12 (68.16 to 73.71)        |
| Marshall Islands                              |                        | 64.54 (63.02 to 66.05)          | 56.41 (53.88 to 58.84)        |
| Myanmar                                       | 54409794               | 68.50 (67.20 to 69.92)          | 59.9 (57.29 to 62.26)         |
| North Korea                                   |                        | 72.00 (70.65 to 73.39)          | 63.46 (61.06 to 65.94)        |
| Papua New Guinea                              | 8947027                | 58.50 (56.42 to 60.51)          | 50.83 (48.12 to 53.24)        |
| Philippines                                   | 109581085              | 69.73 (68.38 to 71.19)          | 60.99 (58.36 to 63.32)        |
| Samoa                                         |                        | 72.88 (71.80 to 74.05)          | 63.26 (60.42 to 65.74)        |
| Solomon Islands                               |                        | 65.73 (64.17 to 67.24)          | 57.15 (54.46 to 59.69)        |
| Sri Lanka                                     | 21413250               | 77.47 (76.03 to 78.97)          | 67.87 (64.83 to 70.58)        |
| Taiwan (Province of China)                    | 23816775               | 79.95 (79.48 to 80.41)          | 69.93 (67.25 to 72.31)        |
| Thailand                                      | 69799978               | 78.11 (77.15 to 79.16)          | 68.46 (65.67 to 70.89)        |
| Timor-Leste                                   | 1318442                | 70.81 (69.64 to 72.13)          | 61.22 (58.36 to 63.79)        |
| Tonga                                         |                        | 71.77 (70.42 to 72.98)          | 62.3 (59.46 to 64.83)         |
| Vanuatu                                       |                        | 64.72 (61.80 to 67.36)          | 56.26 (53.18 to 59.2)         |
| Vietnam                                       | 97338583               | 74.53 (73.31 to 75.60)          | 65.77 (63.21 to 68.14)        |
| <b>Sub-Saharan Africa</b>                     |                        | <b>63.91 (63.06 to 64.65)</b>   | <b>55.2 (52.68 to 57.58)</b>  |
| American Samoa                                |                        | 71.83 (70.86 to 72.80)          | 62.12 (59.31 to 64.73)        |
| Angola                                        | 32866268               | 64.19 (62.55 to 65.80)          | 55.01 (52.16 to 57.77)        |
| Benin                                         | 12123198               | 64.63 (62.65 to 66.47)          | 55.84 (52.97 to 58.66)        |
| Bermuda                                       | 62273                  | 81.34 (80.77 to 81.86)          | 71.38 (68.5 to 73.92)         |
| Botswana                                      | 2351625                | 69.07 (67.37 to 70.38)          | 58.89 (55.81 to 61.63)        |
| Burkina Faso                                  | 20903278               | 61.68 (59.95 to 63.25)          | 53.43 (50.68 to 55.91)        |
| Burundi                                       | 11890781               | 61.55 (59.72 to 63.45)          | 53.8 (51.25 to 56.35)         |
| Cameroon                                      | 26545864               | 62.98 (61.09 to 64.88)          | 54.49 (51.56 to 57.24)        |
| Cape Verde                                    | 555988                 | 75.77 (74.94 to 76.62)          | 65.85 (63.09 to 68.45)        |
| Central African Republic                      | 4829764                | 51.87 (49.79 to 54.08)          | 44.75 (42.16 to 47.31)        |
| Chad                                          | 16425859               | 60.03 (58.22 to 61.79)          | 51.48 (48.73 to 54.09)        |
| Comoros                                       | 869595                 | 68.63 (67.14 to 70.18)          | 59.97 (57.24 to 62.54)        |
| Congo                                         | 5518092                | 62.65 (60.81 to 64.62)          | 54.03 (51.22 to 56.71)        |
| Cote d'Ivoire                                 | 26378275               | 62.48 (60.59 to 64.25)          | 54.15 (51.33 to 56.71)        |
| Democratic Republic of the Congo              | 89561404               | 62.37 (60.71 to 64.10)          | 53.31 (50.35 to 56.11)        |
| Djibouti                                      | 988002                 | 67.35 (64.13 to 70.18)          | 59.26 (56.09 to 62.47)        |
| Equatorial Guinea                             | 1402985                | 65.52 (62.03 to 68.85)          | 56.32 (52.75 to 59.88)        |
| Eritrea                                       | 3546427                | 62.67 (60.58 to 64.81)          | 54.36 (51.45 to 57.1)         |
| Ethiopia                                      | 114963583              | 68.39 (67.46 to 69.31)          | 59.53 (56.93 to 61.91)        |

**Table 4S Population, life expectancy and healthy life expectancy (HALE) for 195 countries and territories according to the GBD 2017 study.**

| <b>GBD regions and countries</b>     | <b>Population in 2020 (N)</b> | <b>Life expectancy (Years, 95% UI)</b> | <b>HALE (Years, 95% UI)</b> |
|--------------------------------------|-------------------------------|----------------------------------------|-----------------------------|
| Gabon                                | 2225728                       | 68.39 (66.94 to 69.74)                 | 58.74 (55.77 to 61.34)      |
| Ghana                                | 31072945                      | 65.50 (64.27 to 66.76)                 | 57.04 (54.37 to 59.5)       |
| Greenland                            | 56772                         | 73.55 (73.03 to 74.08)                 | 63.47 (60.68 to 65.91)      |
| Guam                                 | 168783                        | 73.09 (72.32 to 73.88)                 | 63.63 (60.87 to 65.99)      |
| Guinea                               | 13132792                      | 60.72 (59.11 to 62.26)                 | 52.77 (49.99 to 55.36)      |
| Guinea-Bissau                        | 1967998                       | 59.99 (58.30 to 61.61)                 | 52 (49.3 to 54.31)          |
| Kenya                                | 53771300                      | 65.86 (65.19 to 66.46)                 | 57.62 (55.11 to 59.69)      |
| Lesotho                              | 2142252                       | 54.66 (52.71 to 56.72)                 | 46.95 (44.35 to 49.51)      |
| Liberia                              | 5057677                       | 64.41 (62.82 to 66.07)                 | 54.33 (51.16 to 57.26)      |
| Madagascar                           | 27691019                      | 63.51 (61.64 to 65.39)                 | 55.45 (52.71 to 58.07)      |
| Malawi                               | 19129955                      | 63.21 (61.91 to 64.61)                 | 55.03 (52.38 to 57.46)      |
| Mali                                 | 20250834                      | 61.95 (60.20 to 63.51)                 | 53.12 (50.29 to 55.75)      |
| Mauritania                           | 4649660                       | 70.53 (69.02 to 72.04)                 | 60.9 (57.96 to 63.62)       |
| Mauritius                            | 1271767                       | 74.77 (74.12 to 75.42)                 | 64.78 (61.89 to 67.26)      |
| Mozambique                           | 31255435                      | 58.35 (56.54 to 60.14)                 | 50.6 (47.94 to 52.98)       |
| Namibia                              | 2540916                       | 66.49 (64.64 to 68.21)                 | 57.09 (54.14 to 59.85)      |
| Niger                                | 24206636                      | 62.37 (60.54 to 64.10)                 | 54.2 (51.58 to 56.79)       |
| Nigeria                              | 206139587                     | 64.35 (61.05 to 67.08)                 | 55.1 (51.56 to 58.34)       |
| Northern Mariana Islands             | 57557                         | 76.20 (75.27 to 77.19)                 | 66.13 (63.03 to 68.58)      |
| Puerto Rico                          | 2860840                       | 78.09 (77.55 to 78.64)                 | 68.33 (65.45 to 70.76)      |
| Rwanda                               | 12952209                      | 68.46 (67.13 to 69.88)                 | 59.65 (56.96 to 62.19)      |
| Sao Tome and Principe                | 219161                        | 69.93 (68.69 to 71.22)                 | 60.93 (58.27 to 63.53)      |
| Senegal                              | 16743930                      | 68.05 (66.67 to 69.31)                 | 58.85 (56.05 to 61.48)      |
| Seychelles                           | 98340                         | 73.62 (73.12 to 74.12)                 | 64.96 (62.49 to 67.16)      |
| Sierra Leone                         | 7976985                       | 60.42 (58.70 to 62.21)                 | 52.09 (49.38 to 54.7)       |
| Somalia                              | 15893219                      | 58.52 (55.57 to 61.20)                 | 51.2 (48.03 to 54.2)        |
| South Africa                         | 59308690                      | 66.31 (65.50 to 66.99)                 | 57.05 (54.46 to 59.38)      |
| South Sudan                          | 11193729                      | 59.25 (56.06 to 62.35)                 | 50.6 (47.1 to 53.91)        |
| Sudan                                | 43849269                      | 70.30 (68.42 to 72.37)                 | 60.01 (56.87 to 63.11)      |
| Swaziland                            | 1160164                       | 59.89 (57.87 to 61.81)                 | 51.33 (48.54 to 53.93)      |
| Tanzania                             | 59734213                      | 66.72 (65.46 to 67.97)                 | 58.23 (55.5 to 60.68)       |
| The Gambia                           | 2416664                       | 65.77 (64.19 to 67.30)                 | 56.72 (53.92 to 59.27)      |
| Togo                                 | 8278737                       | 64.37 (62.62 to 66.18)                 | 55.84 (53.02 to 58.55)      |
| Uganda                               | 45741000                      | 65.71 (64.22 to 67.17)                 | 56.96 (54.45 to 59.57)      |
| Virgin Islands, U.S.                 | 104423                        | 73.93 (72.82 to 75.40)                 | 65.38 (62.69 to 67.88)      |
| Zambia                               | 18383956                      | 63.20 (61.71 to 64.60)                 | 55.13 (52.54 to 57.55)      |
| Zimbabwe                             | 14862927                      | 61.35 (59.82 to 62.88)                 | 53.15 (50.56 to 55.4)       |
| <b>Number of countries with data</b> | <b>195</b>                    | <b>195</b>                             | <b>195</b>                  |

**Table 5S Dates of the first COVID-19 confirmed cases and deaths, national and local lockdown initiation, and tourists number**

| Countries and regions                                   | Disease onset    | Deaths onset     | Localised lockdown onset | National lockdown onset | International tourism* |
|---------------------------------------------------------|------------------|------------------|--------------------------|-------------------------|------------------------|
| <b>Central Europe, Eastern Europe, and Central Asia</b> |                  |                  |                          |                         | <b>186477600</b>       |
| Albania                                                 | 9 March 2020     | 12 March 2020    |                          | 11 March 2020           | 5340000                |
| Armenia                                                 | 1 March 2020     | 27 March 2020    |                          | 2 March 2020            | 1652000                |
| Azerbaijan                                              | 29 February 2020 | 21 March 2020    |                          | 3 March 2020            | 2633000                |
| Belarus                                                 | 28 February 2020 | 3 April 2020     |                          |                         | 11501600               |
| Bosnia and Herzegovina                                  | 6 March 2020     | 22 March 2020    |                          | 11 March 2020           | 1053000                |
| Bulgaria                                                | 8 March 2020     | 12 March 2020    |                          | 26 March 2020           | 9273000                |
| Croatia                                                 | 26 February 2020 | 25 March 2020    |                          | 16 March 2020           | 16645000               |
| Czech Republic                                          | 2 March 2020     | 23 March 2020    |                          | 11 March 2020           | 10611000               |
| Estonia                                                 | 28 February 2020 | 26 March 2020    |                          | 16 March 2020           | 3234000                |
| Georgia                                                 | 27 February 2020 | 6 April 2020     |                          | 2 March 2020            | 4757000                |
| Hungary                                                 | 5 March 2020     | 16 March 2020    | 11 March 2020            | 16 March 2020           | 17552000               |
| Kazakhstan                                              | 15 March 2020    | 30 March 2020    |                          | 16 March 2020           | 8789000                |
| Kyrgyzstan                                              | 19 March 2020    | 2 April 2020     |                          | 16 March 2020           | 423000                 |
| Latvia                                                  | 3 March 2020     | 4 April 2020     |                          | 13 March 2020           | 1946000                |
| Lithuania                                               | 28 February 2020 | 21 March 2020    |                          | 16 March 2020           | 2825000                |
| Macedonia                                               | 27 February 2020 | 23 March 2020    |                          | 11 March 2020           | 707000                 |
| Moldova                                                 | 8 March 2020     | 19 March 2020    |                          | 11 March 2020           | 160000                 |
| Mongolia                                                | 10 March 2020    |                  |                          | 19 February 2020        | 529000                 |
| Montenegro                                              | 18 March 2020    | 27 March 2020    |                          | 16 March 2020           | 2077000                |
| Poland                                                  | 4 March 2020     | 13 March 2020    |                          | 16 March 2020           | 19622000               |
| Romania                                                 | 27 February 2020 | 23 March 2020    |                          | 11 March 2020           | 11720000               |
| Russian Federation                                      | 1 February 2020  | 27 March 2020    | 11 March 2020            |                         | 24551000               |
| Serbia                                                  | 7 March 2020     | 21 March 2020    |                          | 16 March 2020           | 1711000                |
| Slovakia                                                | 7 March 2020     | 7 April 2020     | 10 March 2020            | 16 March 2020           | 2256000                |
| Slovenia                                                | 5 March 2020     | 25 March 2020    |                          | 26 March 2020           | 4425000                |
| Tajikistan                                              | 1 May 2020       | 4 May 2020       |                          | 4 May 2020              | 1035000                |
| Turkmenistan                                            |                  |                  |                          |                         |                        |
| Ukraine                                                 | 4 March 2020     | 19 March 2020    | 6 March 2020             | 12 March 2020           | 14104000               |
| Uzbekistan                                              | 16 March 2020    | 29 March 2020    |                          | 16 March 2020           | 5346000                |
| <b>High-income</b>                                      |                  |                  |                          |                         | <b>672770920</b>       |
| Andorra                                                 | 3 March 2020     | 27 March 2020    |                          | 16 March 2020           | 3042000                |
| Argentina                                               | 4 March 2020     | 8 March 2020     |                          | 16 March 2020           | 6942000                |
| Australia                                               | 25 January 2020  | 1 March 2020     | 24 March 2020            |                         | 9246000                |
| Austria                                                 | 26 February 2020 | 13 March 2020    |                          | 16 March 2020           | 30816000               |
| Belgium                                                 | 4 February 2020  | 12 March 2020    |                          | 13 March 2020           | 9119000                |
| Brunei                                                  | 10 March 2020    | 29 March 2020    |                          | 30 March 2020           | 278000                 |
| Canada                                                  | 26 January 2020  | 10 March 2020    | 13 March 2020            | 23 March 2020           | 21134000               |
| Chile                                                   | 4 March 2020     | 23 March 2020    |                          | 16 March 2020           | 5723000                |
| Cyprus                                                  | 10 March 2020    | 25 March 2020    |                          | 13 March 2020           | 3939000                |
| Denmark                                                 | 27 February 2020 | 16 March 2020    |                          | 16 March 2020           | 12749000               |
| Finland                                                 | 30 January 2020  | 22 March 2020    |                          | 18 March 2020           | 3224000                |
| France                                                  | 25 January 2020  | 15 February 2020 | 3 March 2020             | 16 March 2020           | 89322000               |
| Germany                                                 | 28 January 2020  | 10 March 2020    | 3 March 2020             | 18 March 2020           | 38881000               |
| Greece                                                  | 27 February 2020 | 12 March 2020    | 5 March 2020             | 11 March 2020           | 30123000               |
| Iceland                                                 | 29 February 2020 | 20 March 2020    | 16 March 2020            |                         | 2343800                |
| Ireland                                                 | 1 March 2020     | 12 March 2020    |                          | 12 March 2020           | 10926000               |
| Israel                                                  | 22 February 2020 | 21 March 2020    |                          | 12 March 2020           | 4121000                |
| Italy                                                   | 31 January 2020  | 23 February 2020 | 24 February 2020         | 10 March 2020           | 61567200               |
| Japan                                                   | 15 January 2020  | 13 February 2020 |                          | 2 March 2020            | 31192000               |
| Luxembourg                                              | 1 March 2020     | 14 March 2020    |                          | 16 March 2020           | 1018000                |
| Malta                                                   | 8 March 2020     | 9 April 2020     |                          | 13 March 2020           | 2599000                |
| Netherlands                                             | 28 February 2020 | 7 March 2020     |                          | 16 March 2020           | 18780000               |
| New Zealand                                             | 28 February 2020 | 29 March 2020    |                          | 24 March 2020           | 3686000                |
| Norway                                                  | 27 February 2020 | 13 March 2020    |                          | 12 March 2020           | 5688000                |

**Table 5S Dates of the first COVID-19 confirmed cases and deaths, national and local lockdown initiation, and tourists number**

| Countries and regions               | Disease onset    | Deaths onset     | Localised lockdown onset | National lockdown onset | International tourism* |
|-------------------------------------|------------------|------------------|--------------------------|-------------------------|------------------------|
| Portugal                            | 3 March 2020     | 18 March 2020    | 5 March 2020             | 16 March 2020           | 16186000               |
| Singapore                           | 24 January 2020  | 22 March 2020    |                          | 8 April 2020            | 14673000               |
| South Korea                         | 20 January 2020  | 21 February 2020 |                          | 2 March 2020            | 15347000               |
| Spain                               | 1 February 2020  | 5 March 2020     | 11 March 2020            | 16 March 2020           | 82773000               |
| Sweden                              | 1 February 2020  | 12 March 2020    | 18 March 2020            |                         | 7440000                |
| Switzerland                         | 26 February 2020 | 6 March 2020     | 12 March 2020            | 16 March 2020           | 10362000               |
| United Kingdom                      | 31 January 2020  | 7 March 2020     | 28 February 2020         | 20 March 2020           | 36316000               |
| United States                       | 21 January 2020  | 1 March 2020     | 28 February 2020         |                         | 79745920               |
| Uruguay                             | 15 March 2020    | 30 March 2020    |                          | 16 March 2020           | 3469000                |
| <b>Latin America and Caribbean</b>  |                  |                  |                          |                         | <b>89260300</b>        |
| Antigua and Barbuda                 | 15 March 2020    | 10 April 2020    |                          | 13 March 2020           | 269000                 |
| Barbados                            | 18 March 2020    | 6 April 2020     |                          | 19 March 2020           | 680000                 |
| Belize                              | 24 March 2020    |                  |                          | 23 March 2020           | 489000                 |
| Bolivia                             | 12 March 2020    | 30 March 2020    |                          | 12 March 2020           | 1142000                |
| Brazil                              | 26 February 2020 | 18 March 2020    | 12 March 2020            | 25 March 2020           | 6621000                |
| Colombia                            | 7 March 2020     | 22 March 2020    |                          | 16 March 2020           | 3904000                |
| Costa Rica                          | 7 March 2020     | 19 March 2020    |                          | 17 March 2020           | 3017000                |
| Cuba                                | 12 March 2020    | 19 March 2020    |                          | 24 March 2020           | 4684000                |
| Dominica                            | 23 March 2020    |                  |                          | 23 March 2020           | 63000                  |
| Dominican Republic                  | 2 March 2020     | 21 March 2020    |                          | 19 March 2020           | 6569000                |
| Ecuador                             | 1 March 2020     | 14 March 2020    |                          | 13 March 2020           | 2535000                |
| El Salvador                         | 19 March 2020    | 1 April 2020     |                          | 11 March 2020           | 1677300                |
| Grenada                             | 23 March 2020    |                  |                          | 16 March 2020           | 185000                 |
| Guatemala                           | 15 March 2020    | 16 March 2020    |                          | 16 March 2020           | 1781000                |
| Guyana                              | 13 March 2020    | 13 March 2020    |                          | 16 March 2020           | 287000                 |
| Haiti                               | 20 March 2020    | 7 April 2020     |                          | 20 March 2020           | 447000                 |
| Honduras                            | 12 March 2020    | 27 March 2020    |                          | 12 March 2020           |                        |
| Jamaica                             | 12 March 2020    | 25 March 2020    |                          | 13 March 2020           | 2473000                |
| Mexico                              | 29 February 2020 | 21 March 2020    |                          | 23 March 2020           | 41313000               |
| Nicaragua                           | 19 March 2020    | 28 March 2020    |                          |                         | 1256000                |
| Panama                              | 10 March 2020    | 11 March 2020    |                          | 12 March 2020           | 1785000                |
| Paraguay                            | 8 March 2020     | 21 March 2020    |                          | 11 March 2020           | 1181000                |
| Peru                                | 7 March 2020     | 20 March 2020    |                          | 16 March 2020           | 4419000                |
| Saint Lucia                         | 15 March 2020    |                  |                          | 16 March 2020           | 395000                 |
| Saint Vincent and the Grenadines    | 13 March 2020    |                  |                          | 23 March 2020           | 80000                  |
| Suriname                            | 15 March 2020    | 4 April 2020     |                          | 16 March 2020           |                        |
| The Bahamas                         | 16 March 2020    | 2 April 2020     |                          | 16 March 2020           | 1633000                |
| Trinidad and Tobago                 | 13 March 2020    | 26 March 2020    |                          | 14 March 2020           | 375000                 |
| Venezuela                           | 15 March 2020    | 27 March 2020    |                          | 16 March 2020           |                        |
| <b>North Africa and Middle East</b> |                  |                  |                          |                         | <b>154911300</b>       |
| Algeria                             | 26 February 2020 | 13 March 2020    |                          | 12 March 2020           | 2657000                |
| Bahrain                             | 24 February 2020 | 17 March 2020    |                          | 26 February 2020        | 12045000               |
| Egypt                               | 15 February 2020 | 9 March 2020     |                          | 16 March 2020           | 11196000               |
| Iran                                | 20 February 2020 | 20 February 2020 |                          | 26 February 2020        | 7295000                |
| Iraq                                | 25 February 2020 | 6 March 2020     | 28 February 2020         | 7 March 2020            |                        |
| Jordan                              | 3 March 2020     | 29 March 2020    |                          | 15 March 2020           | 4150000                |
| Kuwait                              | 24 February 2020 | 5 April 2020     |                          | 1 March 2020            | 8508000                |
| Lebanon                             | 22 February 2020 | 11 March 2020    |                          | 2 March 2020            | 1964000                |
| Libya                               | 25 March 2020    | 3 April 2020     |                          | 16 March 2020           |                        |
| Morocco                             | 3 March 2020     | 12 March 2020    |                          | 16 March 2020           | 12289000               |
| Oman                                | 25 February 2020 | 1 April 2020     |                          | 15 March 2020           | 2301000                |
| Palestine                           | 6 March 2020     | 27 March 2020    | 5 March 2020             | 16 March 2020           |                        |
| Qatar                               | 1 March 2020     | 29 March 2020    |                          | 10 March 2020           | 1819300                |
| Saudi Arabia                        | 3 March 2020     | 25 March 2020    |                          | 9 March 2020            | 15334000               |
| Syria                               | 23 March 2020    | 30 March 2020    |                          | 16 March 2020           |                        |

**Table 5S Dates of the first COVID-19 confirmed cases and deaths, national and local lockdown initiation, and tourists number**

| Countries and regions                         | Disease onset    | Deaths onset     | Localised lockdown onset | National lockdown onset | International tourism* |
|-----------------------------------------------|------------------|------------------|--------------------------|-------------------------|------------------------|
| Tunisia                                       | 3 March 2020     | 21 March 2020    |                          | 16 March 2020           | 8299000                |
| Turkey                                        | 12 March 2020    | 19 March 2020    |                          | 16 March 2020           | 45768000               |
| United Arab Emirates                          | 27 January 2020  | 22 March 2020    |                          | 8 March 2020            | 21286000               |
| Yemen                                         | 10 April 2020    | 1 May 2020       | 15 March 2020            | 25 March 2020           |                        |
| <b>South Asia</b>                             |                  |                  |                          |                         | <b>18870000</b>        |
| Afghanistan                                   | 25 February 2020 | 24 March 2020    | 3 March 2020             | 14 March 2020           |                        |
| Bangladesh                                    | 9 March 2020     | 22 March 2020    |                          | 17 March 2020           |                        |
| Bhutan                                        | 6 March 2020     |                  | 6 March 2020             | 18 March 2020           | 274000                 |
| India                                         | 30 January 2020  | 13 March 2020    | 4 March 2020             | 25 March 2020           | 17423000               |
| Nepal                                         | 25 January 2020  | 17 May 2020      |                          | 19 March 2020           | 1173000                |
| Pakistan                                      | 27 February 2020 | 20 March 2020    | 27 February 2020         | 14 March 2020           |                        |
| <b>Southeast Asia, East Asia, and Oceania</b> |                  |                  |                          |                         | <b>184206000</b>       |
| Cambodia                                      | 28 January 2020  |                  | 8 March 2020             | 16 March 2020           | 6201000                |
| China                                         | 31 December 2019 | 11 January 2020  | 16 February 2020         | 21 February 2020        | 62900000               |
| Federated States of Micronesia                |                  |                  |                          | 16 March 2020           | 19200                  |
| Fiji                                          | 20 March 2020    |                  |                          | 23 March 2020           | 870000                 |
| Indonesia                                     | 2 March 2020     | 12 March 2020    | 16 March 2020            | 25 March 2020           | 15810000               |
| Kiribati                                      |                  |                  |                          | 30 March 2020           | 7100                   |
| Laos                                          | 25 March 2020    |                  |                          | 19 March 2020           | 3770000                |
| Malaysia                                      | 25 January 2020  | 18 March 2020    |                          | 18 March 2020           | 25832000               |
| Maldives                                      | 8 March 2020     | 1 May 2020       |                          | 12 March 2020           | 1484000                |
| Marshall Islands                              |                  |                  |                          | 30 March 2020           | 6800                   |
| Myanmar                                       | 24 March 2020    | 1 April 2020     | 16 March 2020            | 20 March 2020           | 3551000                |
| North Korea                                   |                  |                  |                          | 2 March 2020            |                        |
| Papua New Guinea                              | 21 March 2020    |                  |                          | 23 March 2020           | 140000                 |
| Philippines                                   | 30 January 2020  | 2 February 2020  | 10 March 2020            | 16 March 2020           | 7168000                |
| Samoa                                         |                  |                  |                          | 20 March 2020           | 164000                 |
| Solomon Islands                               |                  |                  |                          | 30 March 2020           | 27900                  |
| Sri Lanka                                     | 28 January 2020  | 29 March 2020    |                          | 13 March 2020           | 2334000                |
| Taiwan (Province of China)                    | 21 January 2020  | 17 February 2020 |                          |                         |                        |
| Thailand                                      | 13 January 2020  | 1 March 2020     |                          | 18 March 2020           | 38178000               |
| Timor-Leste                                   | 22 March 2020    |                  |                          | 23 March 2020           | 75000                  |
| Tonga                                         |                  |                  |                          | 27 March 2020           | 54000                  |
| Vanuatu                                       |                  |                  | 23 March 2020            | 30 March 2020           | 116000                 |
| Vietnam                                       | 24 January 2020  |                  | 28 February 2020         | 31 March 2020           | 15498000               |
| <b>Sub-Saharan Africa</b>                     |                  |                  |                          |                         | <b>9972100</b>         |
| American Samoa                                |                  |                  |                          |                         | 20200                  |
| Angola                                        | 22 March 2020    | 30 March 2020    |                          | 24 March 2020           | 218000                 |
| Benin                                         | 17 March 2020    | 7 April 2020     |                          | 30 March 2020           | 295000                 |
| Bermuda                                       | 20 March 2020    | 7 April 2020     |                          | 23 March 2020           | 282000                 |
| Botswana                                      | 1 April 2020     | 2 April 2020     |                          | 20 March 2020           |                        |
| Burkina Faso                                  | 11 March 2020    | 19 March 2020    |                          | 16 March 2020           | 144000                 |
| Burundi                                       | 1 April 2020     | 15 April 2020    |                          |                         |                        |
| Cameroon                                      | 7 March 2020     | 25 March 2020    |                          | 18 March 2020           |                        |
| Cape Verde                                    | 21 March 2020    | 25 March 2020    |                          | 14 April 2020           | 710000                 |
| Central African Republic                      | 16 March 2020    | 24 May 2020      |                          | 30 March 2020           |                        |
| Chad                                          | 20 March 2020    | 29 April 2020    |                          | 20 March 2020           |                        |
| Comoros                                       | 2 May 2020       |                  |                          | 20 March 2020           | 35900                  |
| Congo                                         | 16 March 2020    | 1 April 2020     |                          | 19 March 2020           | 156000                 |
| Cote d'Ivoire                                 | 12 March 2020    | 30 March 2020    |                          | 17 March 2020           | 1965000                |
| Democratic Republic of the Congo              | 11 March 2020    | 22 March 2020    |                          | 19 March 2020           |                        |
| Djibouti                                      | 19 March 2020    | 10 April 2020    |                          | 20 March 2020           |                        |
| Equatorial Guinea                             | 15 March 2020    | 24 April 2020    |                          | 15 March 2020           |                        |
| Eritrea                                       | 22 March 2020    |                  |                          | 27 March 2020           |                        |
| Ethiopia                                      | 14 March 2020    | 6 April 2020     |                          | 16 March 2020           | 849000                 |

**Table 5S Dates of the first COVID-19 confirmed cases and deaths, national and local lockdown initiation, and tourists number**

| Countries and regions                | Disease onset    | Deaths onset  | Localised lockdown onset | National lockdown onset | International tourism* |
|--------------------------------------|------------------|---------------|--------------------------|-------------------------|------------------------|
| Gabon                                | 13 March 2020    | 21 March 2020 |                          | 16 March 2020           |                        |
| Ghana                                | 13 March 2020    | 22 March 2020 |                          | 16 March 2020           |                        |
| Greenland                            | 20 March 2020    |               |                          | 19 March 2020           |                        |
| Guam                                 | 19 March 2020    | 22 March 2020 |                          |                         | 1549000                |
| Guinea                               | 14 March 2020    | 16 April 2020 |                          | 25 March 2020           |                        |
| Guinea-Bissau                        | 27 March 2020    | 27 April 2020 |                          | 17 March 2020           |                        |
| Kenya                                | 14 March 2020    | 27 March 2020 |                          | 16 March 2020           |                        |
| Lesotho                              | 15 March 2020    |               |                          | 19 March 2020           | 1173000                |
| Liberia                              | 17 March 2020    | 5 April 2020  |                          | 16 March 2020           |                        |
| Madagascar                           | 21 March 2020    | 18 May 2020   |                          | 21 March 2020           | 291000                 |
| Malawi                               | 3 April 2020     | 8 April 2020  |                          | 23 March 2020           | 871000                 |
| Mali                                 | 26 March 2020    | 1 April 2020  |                          | 19 March 2020           | 14000                  |
| Mauritania                           | 15 March 2020    | 3 April 2020  |                          | 16 March 2020           |                        |
| Mauritius                            | 20 March 2020    | 22 March 2020 |                          | 19 March 2020           | 1399000                |
| Mozambique                           | 23 March 2020    | 26 May 2020   |                          | 23 March 2020           | 2743000                |
| Namibia                              | 15 March 2020    |               |                          | 16 March 2020           |                        |
| Niger                                | 21 March 2020    | 25 March 2020 |                          | 23 March 2020           | 157000                 |
| Nigeria                              | 28 February 2020 | 24 March 2020 |                          | 26 March 2020           |                        |
| Northern Mariana Islands             | 31 March 2020    | 2 April 2020  |                          |                         | 517000                 |
| Puerto Rico                          | 28 March 2020    | 28 March 2020 |                          |                         | 3068000                |
| Rwanda                               | 15 March 2020    |               |                          | 16 March 2020           |                        |
| Sao Tome and Principe                | 9 April 2020     | 1 May 2020    |                          | 20 March 2020           | 33400                  |
| Senegal                              | 3 March 2020     | 2 April 2020  |                          | 16 March 2020           |                        |
| Seychelles                           | 15 March 2020    |               | 16 March 2020            |                         | 362000                 |
| Sierra Leone                         | 1 April 2020     | 24 April 2020 |                          | 31 March 2020           | 57000                  |
| Somalia                              | 17 March 2020    | 10 April 2020 |                          | 18 March 2020           |                        |
| South Africa                         | 6 March 2020     | 27 March 2020 |                          | 18 March 2020           | 10472000               |
| South Sudan                          | 6 April 2020     | 15 May 2020   |                          | 20 March 2020           |                        |
| Sudan                                | 14 March 2020    | 15 March 2020 |                          | 16 March 2020           | 836000                 |
| Swaziland                            | 15 March 2020    | 18 April 2020 |                          | 19 March 2020           | 782000                 |
| Tanzania                             | 17 March 2020    | 29 March 2020 |                          | 19 March 2020           | 1378000                |
| The Gambia                           | 18 March 2020    |               |                          | 18 March 2020           | 552000                 |
| Togo                                 | 7 March 2020     | 28 March 2020 |                          | 20 March 2020           | 573000                 |
| Uganda                               | 22 March 2020    |               |                          | 20 March 2020           |                        |
| Virgin Islands, U.S.                 | 24 March 2020    | 6 April 2020  |                          |                         | 381000                 |
| Zambia                               | 19 March 2020    | 3 April 2020  |                          | 20 March 2020           | 1072000                |
| Zimbabwe                             | 21 March 2020    | 24 March 2020 |                          | 24 March 2020           | 2580000                |
| <b>Number of countries with data</b> | <b>185</b>       | <b>163</b>    | <b>33</b>                | <b>179</b>              | <b>164</b>             |

\*, arrivals in 2018; Data reported according to the European Center for Disease Prevention and Control, the United Nations Educational, Scientific and Cultural Organisation, and the 2018 World Bank report, respectively.
